# Supplementary material for: Human candidate gene polymorphisms and risk of severe malaria in children in Kilifi, Kenya: a case-control association study
Source: PubMed Central journal article supplement (PMC6069675; doi:10.1016/s2352-3026(18)30107-8), 2018-07-20
Supplement: mmc1.pdf [file mmc1.pdf]

# THE LANCET

## Haematology

### Supplementary appendix

This appendix formed part of the original submission and has been peer reviewed. We post it as supplied by the authors.

Supplement to: Ndila CM, Uyoga S, Macharia AW, et al, and the MalariaGEN Consortium. Human candidate gene polymorphisms and risk of severe malaria in children in Kilifi, Kenya: a case-control association study. *Lancet Haematol* 2018; published online July 19. [http://dx.doi.org/10.1016/S2352-3026\(18\)30107](http://dx.doi.org/10.1016/S2352-3026(18)30107).

## Supplementary Material for Ndila *et al.*

### Human candidate gene polymorphisms and risk of severe malaria in children in Kilifi, Kenya: a case-control association study

|                                                                                                                                                                                                                       |       |
|-----------------------------------------------------------------------------------------------------------------------------------------------------------------------------------------------------------------------|-------|
| Table S1: Summary of genes and genetic loci included in the study.                                                                                                                                                    | 2-4   |
| Table S2: Assay definitions for the Agena iPLEX genotyping platform.                                                                                                                                                  | 5-6   |
| Table S3: Odds ratios for all SM for all polymorphisms investigated.                                                                                                                                                  | 7-8   |
| Table S4: Odds ratios for all CM for all polymorphisms investigated.                                                                                                                                                  | 9-10  |
| Table S5: Odds ratios for all SMA for all polymorphisms investigated.                                                                                                                                                 | 11-12 |
| Table S6: Odds ratios for all RD for all polymorphisms investigated.                                                                                                                                                  | 13-14 |
| Table S7: Odds ratios for other-SM for all polymorphisms investigated.                                                                                                                                                | 15-16 |
| Table S8: Tests of association by specific genotypes for the most significant loci in the case-control study.                                                                                                         | 17    |
| Table S9: Odds ratios for CM only for all polymorphisms investigated.                                                                                                                                                 | 18-19 |
| Table S10: Odds ratios for SMA only for all polymorphisms investigated.                                                                                                                                               | 20-21 |
| Table S11: Odds ratios for RD only for all polymorphisms investigated.                                                                                                                                                | 22-23 |
| Table S12: Pairwise interactions between the polymorphisms (1 per gene) at autosomal loci at which we found significant associations in our primary analyses using the likelihood ratio approach (Main Text Table 2). | 24    |
| Table S13: Association of Red Blood Cell indices for all severe malaria cases.                                                                                                                                        | 25    |
| Table S14: Proportions of variance explained by individual markers.                                                                                                                                                   | 26-27 |
| Table S15: Concordance between iPLEX assay for rs186873296 and the BspI RFLP assay for the Dantu hybrid in paediatric cases of severe malaria                                                                         | 28    |
| Figure S1: Flow diagram showing the selection of severe malaria cases.                                                                                                                                                | 29    |
| Figure S2: Manhattan plot showing the distribution of p-values for association tests with severe malaria.                                                                                                             | 30    |
| Figure S3: Network diagram for interaction of polymorphim pairs in severe malaria.                                                                                                                                    | 31    |
| Figure S4: Two-way epistatic interactions between rs334 (HbS) and $\alpha$ <sup>-3.7</sup> -thalassaemia for all severe malaria cases.                                                                                | 32    |
| Figure S5: Linkage disequilibrium among the 13 polymorphisms explaining most of the variance in the population.                                                                                                       | 33    |
| Figure S6: Proportion of variance in the risk of severe malaria among children that is explained by genetic polymorphisms and other factors.                                                                          | 34    |
| Appendix 1: MalariaGEN Consortium members                                                                                                                                                                             | 35-39 |

| #  | Gene Symbol | Gene Description                                                     | SNP ID      | Chr | Position  | Removed in QC |
|----|-------------|----------------------------------------------------------------------|-------------|-----|-----------|---------------|
| 1  | AJAP1       | Adherens junctions associated protein 1                              | rs113788643 | 1   | 4817664   |               |
|    |             |                                                                      | rs6674631   | 1   | 4834821   |               |
| 2  | LPHN2       | Latrophilin 2                                                        | rs146428334 | 1   | 81688714  |               |
|    |             |                                                                      | rs72933304  | 1   | 81726138  |               |
|    |             |                                                                      | rs72933310  | 1   | 81727427  |               |
|    |             |                                                                      | rs72933350  | 1   | 81751439  |               |
|    |             |                                                                      | rs4650365   | 1   | 81770827  |               |
| 3  | GBP7        | Guanylate binding protein 7                                          | rs1803632   | 1   | 89582690  |               |
| 4  | DARC        | Duffy blood group, atypical chemokine receptor                       | rs2814778   | 1   | 159174683 |               |
|    |             |                                                                      | rs55868763  | 1   | 203652140 |               |
|    |             |                                                                      | rs1541255   | 1   | 203652141 |               |
| 5  | ATP2B4      | ATPase, Ca <sup>2+</sup> transporting, plasma membrane 4             | rs10900585  | 1   | 203654024 |               |
|    |             |                                                                      | rs4951074   | 1   | 203660781 |               |
|    |             |                                                                      | rs3753036   | 1   | 203677250 |               |
|    |             |                                                                      | rs3024500   | 1   | 206940831 |               |
| 6  | IL10        | Interleukin 10                                                       | rs1800896   | 1   | 206946897 |               |
|    |             |                                                                      | rs1800890   | 1   | 206949365 |               |
|    |             |                                                                      | rs17047660  | 1   | 207782856 |               |
| 7  | CR1         | Complement receptor 1                                                | rs17047661  | 1   | 207782889 |               |
|    |             |                                                                      | rs1371478   | 2   | 4901589   |               |
| 8  | LOC727982   | Long intergenic non-protein coding RNA 1249                          | rs1371474   | 2   | 4909777   |               |
|    |             |                                                                      | rs10188961  | 2   | 4926593   |               |
|    |             |                                                                      | rs973128    | 2   | 20332487  |               |
| 9  | LAPTM4A     | Lysosomal protein transmembrane 4 alpha                              | rs973128    | 2   | 20332487  |               |
| 10 | SDC1        | Syndecan 1                                                           | rs11899121  | 2   | 20367973  |               |
| 11 | IL1A        | Interleukin 1, alpha                                                 | rs17561     | 2   | 113537223 |               |
| 12 | IL1B        | Interleukin 1, beta                                                  | rs1143634   | 2   | 113590390 |               |
| 13 | ZSWIM2      | Zinc finger, SWIM-type containing 2                                  | rs4316902   | 2   | 188007364 |               |
|    |             |                                                                      | rs144778284 | 2   | 188012821 |               |
| 14 | IL17RE      | Interleukin 17 receptor E                                            | rs708567    | 3   | 9960070   |               |
| 15 | OXNAD1      | Oxidoreductase NAD-binding domain containing 1                       | rs200704287 | 3   | 16407519  | monomorphic   |
|    |             |                                                                      | rs79691057  | 3   | 16408251  | monomorphic   |
|    |             |                                                                      | rs75180423  | 3   | 16408723  | monomorphic   |
| 16 | TLR9        | Toll-like receptor 9                                                 | rs187084    | 3   | 52261031  |               |
| 17 | IL17RD      | Interleukin 17 receptor D                                            | rs6780995   | 3   | 57138419  |               |
| 18 | ARL14       | ADP-ribosylation factor-like 14                                      | rs76033371  | 3   | 160362359 |               |
|    |             |                                                                      | rs75731597  | 3   | 160364808 |               |
|    |             |                                                                      | rs74954675  | 3   | 160381509 |               |
| 19 | B3GALNT1    | Beta-1,3-N-acetylgalactosaminyltransferase 1 (Globoside blood group) | rs12107243  | 3   | 160793678 |               |
| 20 | TLR1        | Toll-like receptor 1                                                 | rs4833095   | 4   | 38799710  |               |
| 21 | TLR6        | Toll-like receptor 6                                                 | rs5743810   | 4   | 38830350  |               |
|    |             |                                                                      | rs5743809   | 4   | 38830514  |               |
| 22 | INPP4B      | Inositol polyphosphate-4-phosphatase, type II, 105kda                | rs77389579  | 4   | 143538511 |               |
|    |             |                                                                      | rs13103597  | 4   | 143558581 |               |
| 23 | USP38       | Ubiquitin specific peptidase 38                                      | rs4266246   | 4   | 143971242 |               |
|    |             |                                                                      | rs28459062  | 4   | 144039139 |               |
| 24 | GAB1        | GRB2-associated binding protein 1                                    | rs7663712   | 4   | 144261117 |               |
| 25 | GUSBP5      | Glucuronidase, beta pseudogene 5                                     | rs148111931 | 4   | 144540045 | monomorphic   |
|    |             |                                                                      | rs184908374 | 4   | 144665753 |               |
|    |             |                                                                      | rs149914432 | 4   | 144666678 |               |
|    |             |                                                                      | rs186790584 | 4   | 144680140 |               |
|    |             |                                                                      | rs184895969 | 4   | 144698528 |               |
| 26 | FREM3       | FRAS1 related extracellular matrix 3                                 | rs186873296 | 4   | 144702474 |               |
|    |             |                                                                      | rs1801033   | 5   | 41199959  |               |
|    |             |                                                                      | rs2706384   | 5   | 131826880 |               |
| 28 | IRF1        | Interferon regulatory factor 1                                       | rs2706384   | 5   | 131826880 |               |
| 29 | IL13        | Interleukin 13                                                       | rs20541     | 5   | 131995964 |               |
| 30 | IL4         | Interleukin 4                                                        | rs2243250   | 5   | 132009154 |               |
| 31 | GABBR1      | Gamma-aminobutyric acid (GABA) B receptor, 1                         | rs192151845 | 6   | 29588309  |               |

|    |                |                                                                   |                         |    |           |             |
|----|----------------|-------------------------------------------------------------------|-------------------------|----|-----------|-------------|
| 32 | <i>HCG4</i>    | HLA complex group 4                                               | rs114980857             | 6  | 29772098  |             |
| 33 | <i>LTA</i>     | Lymphotoxin alpha                                                 | rs2239704               | 6  | 31540141  |             |
|    |                |                                                                   | rs909253                | 6  | 31540313  |             |
|    |                |                                                                   | rs1799964               | 6  | 31542308  |             |
|    |                |                                                                   | rs1800750               | 6  | 31542963  |             |
| 34 | <i>TNF</i>     | Tumour necrosis factor                                            | rs1800629               | 6  | 31543031  |             |
|    |                |                                                                   | rs361525                | 6  | 31543101  |             |
|    |                |                                                                   | rs3093662               | 6  | 31544189  |             |
| 35 | <i>HSPA1B</i>  | Heat shock protein family A (HSP70) member 1B                     | rs6457452               | 6  | 31795550  |             |
| 36 | <i>SNORD48</i> | Small nucleolar RNA, C/D box 48                                   | rs116288147             | 6  | 31803074  |             |
| 37 | <i>CTLA</i>    | SLC44A4 (Solid carrier family 44, member 4)                       | rs2242665               | 6  | 31839309  |             |
| 38 | <i>IL20RA</i>  | Interleukin 20 receptor, alpha                                    | rs1555498               | 6  | 137325847 |             |
|    |                |                                                                   | rs55958968              | 6  | 150942218 |             |
|    |                |                                                                   | rs144224092             | 6  | 150973623 | missingness |
|    |                |                                                                   | rs79100774              | 6  | 150975934 |             |
|    |                |                                                                   | rs114726617             | 6  | 150980481 |             |
|    |                |                                                                   | rs2131263               | 6  | 150981102 |             |
| 39 | <i>PLEKHG1</i> | Pleckstrin homology domain containing, family G member 1          | rs76924464              | 6  | 150982529 |             |
|    |                |                                                                   | rs151293197             | 6  | 150994429 |             |
|    |                |                                                                   | rs142712208             | 6  | 151026346 |             |
|    |                |                                                                   | rs15116938              | 6  | 151046029 |             |
|    |                |                                                                   | rs141555199             | 6  | 151048708 |             |
| 40 | <i>NOD1</i>    | Nucleotide-binding oligomerization domain containing 1            | rs2075820               | 7  | 30492237  |             |
| 41 | <i>CD36</i>    | CD36 molecule (thrombospondin receptor)                           | rs3211938               | 7  | 80300449  |             |
| 42 | <i>TLR4</i>    | Toll-like receptor 4                                              | rs4986790               | 9  | 120475302 |             |
|    |                |                                                                   | rs4986791               | 9  | 120475602 |             |
|    |                |                                                                   | rs8176750               | 9  | 136131057 |             |
|    |                |                                                                   | rs56390333              | 9  | 136131064 |             |
| 43 | <i>ABO</i>     | ABO blood group                                                   | rs8176746               | 9  | 136131322 |             |
|    |                |                                                                   | rs8176719               | 9  | 136132909 |             |
|    |                |                                                                   | rs11016116              | 10 | 129975450 |             |
| 44 | <i>MKI67</i>   | Marker of proliferation Ki-67                                     | rs148494166             | 10 | 129976030 |             |
|    |                |                                                                   | rs115947774             | 10 | 130072795 |             |
| 45 | <i>RHOG</i>    | Ras homolog family member G                                       | rs138826089             | 11 | 3847190   | monomorphic |
| 46 | <i>RRM1</i>    | Ribonucleotide reductase M1                                       | rs116472045             | 11 | 4111415   |             |
| 47 | <i>HBB</i>     | Haemoglobin beta chain                                            | rs334                   | 11 | 5248232   |             |
| 48 | <i>TRIM5</i>   | Tripartite motif containing 5                                     | rs7935564               | 11 | 5718517   |             |
| 49 | <i>RTN3</i>    | Reticulon 3                                                       | rs542998                | 11 | 63487386  |             |
| 50 | <i>GRIP1</i>   | Glutamate receptor interacting protein 1                          | rs192909543             | 12 | 67366471  | monomorphic |
|    |                |                                                                   | rs1394263               | 12 | 67366537  |             |
|    |                |                                                                   | rs1566830               | 12 | 67369898  |             |
| 51 | <i>CAND1</i>   | Cullin-associated and neddylation-dissociated 1                   | rs12307123              | 12 | 67394950  |             |
|    |                |                                                                   | rs10459266              | 12 | 67455888  |             |
|    |                |                                                                   | rs2227507               | 12 | 68642647  |             |
|    |                |                                                                   | rs1012356               | 12 | 68644618  |             |
| 52 | <i>IL22</i>    | Interleukin 22                                                    | rs2227491               | 12 | 68646521  |             |
|    |                |                                                                   | rs2227485               | 12 | 68647713  |             |
|    |                |                                                                   | rs2227478               | 12 | 68648622  |             |
| 53 | <i>TPTE2</i>   | Transmembrane phosphoinositide 3-phosphatase and tensin homolog 2 | rs182873742             | 13 | 20050239  |             |
| 54 | <i>SPTB</i>    | Spectrin, beta, erythrocytic                                      | rs229587                | 14 | 65263300  |             |
| 55 | <i>LTBP2</i>   | Latent transforming growth factor beta binding protein 2          | rs74063230              | 14 | 75066093  | monomorphic |
| 56 | <i>YLPM1</i>   | YLP motif containing 1                                            | rs10139016              | 14 | 75274288  |             |
| 57 | <i>RPS6KLI</i> | Ribosomal protein S6 kinase-like 1                                | rs3742785               | 14 | 75373034  |             |
| 58 | <i>ADCY9</i>   | Adenylate cyclase 9                                               | rs2230739               | 16 | 4033436   |             |
|    |                |                                                                   | rs10775349              | 16 | 4079823   |             |
| 59 | <i>HBA</i>     | Haemoglobin, alpha                                                | $\alpha^+$ thalassaemia | 16 | 222846    |             |
| 60 | <i>IL4R</i>    | Interleukin 4 receptor                                            | rs1805015               | 16 | 27374180  |             |
| 61 | <i>ADORA2B</i> | Adenosine A2b receptor                                            | rs2535611               | 17 | 15861332  |             |
| 62 | <i>NOS2</i>    | Nitric oxide synthase 2A (inducible, hepatocytes)                 | rs2297518               | 17 | 26096597  |             |
|    |                |                                                                   | rs1800482               | 17 | 26128509  |             |

|           |               |                                                 |             |    |           |             |
|-----------|---------------|-------------------------------------------------|-------------|----|-----------|-------------|
|           |               |                                                 | rs9282799   | 17 | 26128728  |             |
|           |               |                                                 | rs8078340   | 17 | 26129212  |             |
| <b>63</b> | <i>BCAS3</i>  | Microtubule associated cell migration factor    | rs184142841 | 17 | 58855323  | monomorphic |
| <b>64</b> | <i>TBX2</i>   | T-box 2                                         | rs73991577  | 17 | 59323072  |             |
| <b>65</b> | <i>EMRI</i>   | ADGRE1 (Adhesion G-protein-coupled receptor E1) | rs373533    | 19 | 6919624   |             |
|           |               |                                                 | rs461645    | 19 | 6919753   |             |
| <b>66</b> | <i>ICAM</i>   | Intercellular adhesion molecule 1               | rs5498      | 19 | 10395683  |             |
| <b>67</b> | <i>GNAS</i>   | Guanine nucleotide binding protein, alpha       | rs8386      | 20 | 57485812  |             |
| <b>68</b> | <i>DERL3</i>  | Derlin 3                                        | rs1128127   | 22 | 24179132  |             |
| <b>60</b> | <i>CD40LG</i> | CD40 ligand (TNF superfamily, member 5)         | rs3092945   | X  | 135729609 |             |
|           |               |                                                 | rs1126535   | X  | 135730555 |             |
| <b>70</b> | <i>G6PD</i>   | Glucose-6-phosphate dehydrogenase               | rs1050829   | X  | 153763492 |             |
|           |               |                                                 | rs1050828   | X  | 153764217 |             |

Chr = chromosome, Removed in QC = SNPs that failed QC and were removed from further analysis.  
Co-ordinate system is with respect to GRCh37.

**Table S1: Summary of genes and genetic loci included in the study.**



|    |       |             |                                |                                 |     |      |      |    |      |     |   |        |                              |   |        |                              |   |        |                              |
|----|-------|-------------|--------------------------------|---------------------------------|-----|------|------|----|------|-----|---|--------|------------------------------|---|--------|------------------------------|---|--------|------------------------------|
| W3 | iPLEX | rs148111931 | ACGTTGGATGTGGTTCTTGGTAGGTGGG   | ACGTTGGATGGAGCTGTGATGGAGTCACTG  | 106 | 98.4 | 68.8 | 53 | 52.4 | dg  | F | 6864.5 | gGGGTGATAGAGTGAAACCCCTG      | A | 7135.7 | gGGGTGATAGAGTGAAACCCCTG      | T | 7191.6 | gGGGTGATAGAGTGAAACCCCTG      |
| W3 | iPLEX | rs182873742 | ACGTTGGATGGCTCTTGCTCATGTGATCTG | ACGTTGGATGAGGAATGAGCATAGGGAGAG  | 104 | 98.5 | 68.8 | 52 | 43.5 | D   | F | 6927.5 | TGTCATCTCCCTCAAACTAGACACC    | C | 7174.7 | TGTCATCTCCCTCAAACTAGACACC    | G | 7214.7 | TGTCATCTCCCTCAAACTAGACACC    |
| W3 | iPLEX | rs184895969 | ACGTTGGATGAGGTCCTCCAAATTTTATC  | ACGTTGGATGTGACCAATACACCTCCCAAC  | 100 | 90.2 | 68.8 | 47 | 30.4 | D   | R | 7012.6 | CAGTTTTTAATGACATCACATTG      | T | 7283.8 | CAGTTTTTAATGACATCACATTG      | C | 7299.8 | CAGTTTTTAATGACATCACATTG      |
| W3 | iPLEX | rs114726617 | ACGTTGGATGTCCAATCAAGGAGCAGAG   | ACGTTGGATGCTCTGTAAGCTCCAAGGCAT  | 119 | 94.6 | 68.8 | 50 | 30.4 | DH  | F | 7079.6 | AAAAAGTATTTGGGTACAACCA       | A | 7350.9 | AAAAAGTATTTGGGTACAACCA       | G | 7366.9 | AAAAAGTATTTGGGTACAACCA       |
| W3 | iPLEX | rs79691057  | ACGTTGGATGGGCATACTACTCTCTCAC   | ACGTTGGATGGGCATAGTGATGACCTGGAC  | 136 | 93.6 | 68.8 | 53 | 37.5 | DA  | R | 7246.7 | AACCTAGCATGACTTCATCTCAC      | G | 7493.9 | AACCTAGCATGACTTCATCTCAC      | A | 7573.8 | AACCTAGCATGACTTCATCTCAC      |
| W3 | iPLEX | rs74063230  | ACGTTGGATGATCTTCCAGACTGGCTCC   | ACGTTGGATGCCAGGCTGAGATAAATGAG   | 111 | 96.7 | 68.8 | 49 | 37.5 | D   | F | 7473.9 | CTGAGATAAAATGAGAAGTCTAGG     | A | 7745.1 | CTGAGATAAAATGAGAAGTCTAGG     | G | 7761.1 | CTGAGATAAAATGAGAAGTCTAGG     |
| W3 | iPLEX | rs10188961  | ACGTTGGATGGCAATGTTTGAATTCAGAG  | ACGTTGGATGATCACCTTACTCTCTCAC    | 95  | 86.4 | 68.8 | 48 | 24   |     | R | 7601   | ACTTCAAAAATAACTGCAACTATTAC   | G | 7848.2 | ACTTCAAAAATAACTGCAACTATTAC   | A | 7928.1 | ACTTCAAAAATAACTGCAACTATTAC   |
| W3 | iPLEX | rs6674631   | ACGTTGGATGATGTCTGTACTACTCTCC   | ACGTTGGATGGGCTTTTGAATAAAGGGCAG  | 93  | 98.4 | 68.8 | 59 | 52   | D   | F | 7624   | TGGATTTGTAGAAGTGCCCTCCCA     | A | 7895.2 | TGGATTTGTAGAAGTGCCCTCCCA     | G | 7911.2 | TGGATTTGTAGAAGTGCCCTCCCA     |
| W3 | iPLEX | rs115947774 | ACGTTGGATGATCCAATCAAGGATCATAG  | ACGTTGGATGTCCAATGCAAGGAATGCC    | 119 | 86.7 | 68.8 | 56 | 42.3 | D   | R | 7803.1 | TAAGTAGATTAACCCCAATCTCAC     | G | 8050.3 | TAAGTAGATTAACCCCAATCTCAC     | A | 8130.2 | TAAGTAGATTAACCCCAATCTCAC     |
| W3 | iPLEX | rs2131263   | ACGTTGGATGGCTCTGTATCTGAAACCAAC | ACGTTGGATGGCCTTACATGTAAGTACTCAC | 128 | 90.3 | 68.8 | 50 | 28   | DA  | F | 7946.2 | gTGATCCAAAATTTAGAAAATCTCAC   | C | 8193.4 | gTGATCCAAAATTTAGAAAATCTCAC   | T | 8273.3 | gTGATCCAAAATTTAGAAAATCTCAC   |
| W3 | iPLEX | rs4316902   | ACGTTGGATGGTCCCATGTTTATATAA    | ACGTTGGATGGCCTTTTGAATAAAGGGCAG  | 118 | 80   | 68.8 | 45 | 15.4 | D   | F | 8082.3 | AGAAATTTAAAAGTAATGTGAAAAATA  | A | 8353.5 | AGAAATTTAAAAGTAATGTGAAAAATA  | G | 8369.5 | AGAAATTTAAAAGTAATGTGAAAAATA  |
| W3 | iPLEX | rs5598968   | ACGTTGGATGGCAACAACCTCAGGAGTTG  | ACGTTGGATGCTTTGGCCTCTCTGGATTG   | 133 | 95.7 | 68.8 | 46 | 18.5 | DA  | F | 8237.4 | GTTTTCTACCTTTAAAATGAATTAAT   | A | 8508.6 | GTTTTCTACCTTTAAAATGAATTAAT   | G | 8524.6 | GTTTTCTACCTTTAAAATGAATTAAT   |
| W3 | iPLEX | rs114726617 | ACGTTGGATGGCTCTGTATCTGAAACCAAC | ACGTTGGATGGCCTTACATGTAAGTACTCAC | 98  | 97.1 | 68.8 | 55 | 37   | D   | F | 8300.4 | GCTTCTGTCAGCAAGAAATAGAAAA    | C | 8547.6 | GCTTCTGTCAGCAAGAAATAGAAAA    | T | 8627.5 | GCTTCTGTCAGCAAGAAATAGAAAA    |
| W3 | iPLEX | rs186873296 | ACGTTGGATGGTCCCATGTTTATATAA    | ACGTTGGATGGCCTTTTGAATAAAGGGCAG  | 100 | 100  | 68.8 | 52 | 27.6 | d   | R | 8862.8 | AGAAATTTAAAAGTAATGTGAAAAATA  | G | 9110   | AGAAATTTAAAAGTAATGTGAAAAATA  | A | 9189.9 | AGAAATTTAAAAGTAATGTGAAAAATA  |
| W3 | iPLEX | rs144778284 | ACGTTGGATGTGCACTTATAGCCCAATTC  | ACGTTGGATGGGTAATAACAAAGGGTGG    | 107 | 97   | 68.8 | 60 | 44.8 |     | R | 8885.8 | GGGTCCCTTTGCAAGGAACATCACAATT | T | 9157   | GGGTCCCTTTGCAAGGAACATCACAATT | C | 9173   | GGGTCCCTTTGCAAGGAACATCACAATT |
| W4 | iPLEX | rs11016116  | ACGTTGGATGTGAGAGGCACTCTGTACC   | ACGTTGGATGGCTTTTATCTCACATGTGCC  | 119 | 98.6 | 18.5 | 46 | 60   | D   | R | 4522   | CACGTACCCGAGCAC              | G | 4769.1 | CACGTACCCGAGCAC              | A | 4849.1 | CACGTACCCGAGCAC              |
| W4 | iPLEX | rs8176750   | ACGTTGGATGAACTGAGGCTTACTCTGG   | ACGTTGGATGCAACCTCCCAAGAAAAATG   | 102 | 94.6 | 85   | 61 | 80   | H   | F | 4578.9 | GGCAGCCGCTCACGG              | I | 4866.1 | GGCAGCCGCTCACGG              | D | 4906   | GGCAGCCGCTCACGG              |
| W4 | iPLEX | rs144224092 | ACGTTGGATGAACTGACCTCTGTGATCC   | ACGTTGGATGGTGGTATCCTTTTACTG     | 136 | 82.3 | 18.5 | 47 | 60   | DA  | F | 4633   | CAGCACTTTGGGAGG              | C | 4880.2 | CAGCACTTTGGGAGG              | T | 4960.1 | CAGCACTTTGGGAGG              |
| W4 | iPLEX | rs10459266  | ACGTTGGATGTCCAAAGTCCCTCCCTTTC  | ACGTTGGATGTCCAAACAGAGGAGTGTAG   | 112 | 99.4 | 78.4 | 46 | 53.3 | dh  | R | 4832.2 | tCTCATCTTGGCAGCA             | C | 5119.4 | tCTCATCTTGGCAGCA             | A | 5159.3 | tCTCATCTTGGCAGCA             |
| W4 | iPLEX | rs192151845 | ACGTTGGATGCACTCACTACTCTCTGCG   | ACGTTGGATGTTAATGACAGACTGGAGGCG  | 112 | 96.6 | 18.5 | 55 | 68.8 | D   | R | 5027.3 | TTGGAGCAGGAGGCG              | G | 5274.5 | TTGGAGCAGGAGGCG              | A | 5354.4 | TTGGAGCAGGAGGCG              |
| W4 | iPLEX | rs7389579   | ACGTTGGATGTGTCATCCCTGTGACTAAG  | ACGTTGGATGGCTGGCTGTGAAAGATGAA   | 122 | 95.6 | 18.5 | 47 | 47.1 | DA  | F | 5043.3 | CTCCAACCTCACACAT             | G | 5330.5 | CTCCAACCTCACACAT             | T | 5370.4 | CTCCAACCTCACACAT             |
| W4 | iPLEX | rs56390333  | ACGTTGGATGTCCAGAGCCCTGGCAG     | ACGTTGGATGGAAGCTGAGGTTCACTGG    | 97  | 59.7 | 18.5 | 55 | 64.7 | dh  | R | 5189.4 | AGAACCACAGGCGGTC             | G | 5436.6 | AGAACCACAGGCGGTC             | C | 5476.6 | AGAACCACAGGCGGTC             |
| W4 | iPLEX | rs973128    | ACGTTGGATGATATTGGAGGCTTAGCCAG  | ACGTTGGATGGCCTTTTGTCTGCTGAG     | 107 | 98.4 | 18.5 | 55 | 55.6 | Ds  | R | 5392.5 | TTATCCCTTGCCCTGGCT           | G | 5639.7 | TTATCCCTTGCCCTGGCT           | C | 5679.7 | TTATCCCTTGCCCTGGCT           |
| W4 | iPLEX | rs148494166 | ACGTTGGATGGGATCTGTTGAGCAGAAG   | ACGTTGGATGATCTGGGAGATCTGCCCTG   | 111 | 98.1 | 18.5 | 46 | 47.1 | d   | F | 5545.6 | cCGTCTAGGTTTGGAA             | C | 5792.8 | cCGTCTAGGTTTGGAA             | T | 5872.7 | cCGTCTAGGTTTGGAA             |
| W4 | iPLEX | rs55868763  | ACGTTGGATGTAGCCGTCGAAGTCTAGAT  | ACGTTGGATGTCCACTCAGTCCCCCATC    | 101 | 96.1 | 18.5 | 52 | 52.6 | DS  | F | 5723.7 | CTCGCTGCCAGACTTCATAC         | C | 5970.9 | CTCGCTGCCAGACTTCATAC         | G | 6010.9 | CTCGCTGCCAGACTTCATAC         |
| W4 | iPLEX | rs4951074   | ACGTTGGATGCAAGTCTATCTCTGCGG    | ACGTTGGATGTCCAAACAGAGGAGTGTAG   | 100 | 100  | 18.5 | 46 | 42.1 | D   | R | 5820.8 | CTCTAGAGATAAAGCAGT           | G | 6068   | CTCTAGAGATAAAGCAGT           | A | 6147.9 | CTCTAGAGATAAAGCAGT           |
| W4 | iPLEX | rs186790584 | ACGTTGGATGATCTCTGGAGAGCTTATG   | ACGTTGGATGTGCCCTTTAGTGTCTCTAC   | 143 | 86.4 | 18.5 | 45 | 38.9 | DA  | F | 5851.8 | cTAAAGCAGCTGATTGAG           | A | 6123   | cTAAAGCAGCTGATTGAG           | T | 6178.9 | cTAAAGCAGCTGATTGAG           |
| W4 | iPLEX | rs76033371  | ACGTTGGATGCCCAGTGTGTTAGCCTTTC  | ACGTTGGATGCTCAGGCTTCTTAGTCTCC   | 132 | 96   | 18.5 | 46 | 40   | DA  | R | 6026.9 | TTCTAGTCTCCCTTAAACAAG        | G | 6274.1 | TTCTAGTCTCCCTTAAACAAG        | A | 6354   | TTCTAGTCTCCCTTAAACAAG        |
| W4 | iPLEX | rs3753036   | ACGTTGGATGGCACTCACTACTCTCTGCG  | ACGTTGGATGTCCAAACAGAGGAGTGTAG   | 120 | 98.4 | 78.4 | 47 | 44.4 | d   | R | 6045   | aaACCCACTCTAAGTGCTA          | G | 6292.1 | aaACCCACTCTAAGTGCTA          | A | 6372.1 | aaACCCACTCTAAGTGCTA          |
| W4 | iPLEX | rs12307123  | ACGTTGGATGTCTGGAGAGACAATCAGAAC | ACGTTGGATGGCCAGTCAACTATCCCTG    | 114 | 97.8 | 18.5 | 46 | 40   | d   | F | 6089   | TGTTTATACTAGCTCTGGTC         | C | 6336.2 | TGTTTATACTAGCTCTGGTC         | T | 6416.1 | TGTTTATACTAGCTCTGGTC         |
| W4 | iPLEX | rs4650365   | ACGTTGGATGTCAACATAAACAATATGAGC | ACGTTGGATGCTGACAGTCTATAGAGTCCC  | 108 | 87.5 | 18.5 | 45 | 50   | Ds  | F | 6317.1 | tgGCTGAACCTCCTACTACT         | C | 6564.3 | tgGCTGAACCTCCTACTACT         | T | 6644.2 | tgGCTGAACCTCCTACTACT         |
| W4 | iPLEX | rs14155199  | ACGTTGGATGCAAGTCTACTGCACTTATAA | ACGTTGGATGTAGAGGGAATTTGTCTAAG   | 108 | 82.8 | 18.5 | 49 | 42.9 | dh  | F | 6445.2 | GTCTAGCTACATAGAAGCTGT        | C | 6692.4 | GTCTAGCTACATAGAAGCTGT        | G | 6732.4 | GTCTAGCTACATAGAAGCTGT        |
| W4 | iPLEX | rs79100774  | ACGTTGGATGCCCCCTGGATGGTTATATTC | ACGTTGGATGTAGAAGAATGATTGGTGG    | 121 | 61.8 | 18.5 | 48 | 38.1 | dA  | F | 6509.3 | ATTGGTGGCTATAGCATAAAG        | C | 6756.4 | ATTGGTGGCTATAGCATAAAG        | G | 6796.5 | ATTGGTGGCTATAGCATAAAG        |
| W4 | iPLEX | rs184908374 | ACGTTGGATGGTGGCAATTTGTTGGTTAC  | ACGTTGGATGCACAACCTCTGGTGTGAATG  | 100 | 97.1 | 18.5 | 51 | 38.1 |     | R | 6773.4 | tTGGTGTGAATGCACCAATAT        | G | 7020.6 | tTGGTGTGAATGCACCAATAT        | A | 7100.5 | tTGGTGTGAATGCACCAATAT        |
| W4 | iPLEX | rs149914432 | ACGTTGGATGAAAGTACTGCCACTGCCAAC | ACGTTGGATGAGCAGAGCAAGTTGGTAG    | 131 | 94.7 | 18.5 | 49 | 31.8 | DAs | F | 6873.5 | AAGTTGGTAGCAAAAAAGAGAAC      | C | 7120.7 | AAGTTGGTAGCAAAAAAGAGAAC      | A | 7144.7 | AAGTTGGTAGCAAAAAAGAGAAC      |
| W4 | iPLEX | rs151293197 | ACGTTGGATGGCAGAGTCCAGATTACAC   | ACGTTGGATGGATTTTCTGTCTCAAGC     | 101 | 87.9 | 18.5 | 52 | 38.1 | d   | F | 7047.6 | ggTGTCTCAAGCAAATGCACAT       | C | 7294.8 | ggTGTCTCAAGCAAATGCACAT       | G | 7334.8 | ggTGTCTCAAGCAAATGCACAT       |
| W4 | iPLEX | rs72933310  | ACGTTGGATGCCTCTATGCTTTTCTATGGC | ACGTTGGATGGTAGGATATCTATGCAATGG  | 96  | 92.9 | 18.5 | 46 | 30.4 | D   | F | 7070.6 | GATATCTATGCAATGGAATACTA      | C | 7317.8 | GATATCTATGCAATGGAATACTA      | T | 7397.7 | GATATCTATGCAATGGAATACTA      |
| W4 | iPLEX | rs6457452   | ACGTTGGATGAAACGGCCAGCCTGAGGAG  | ACGTTGGATGGTTCGCTCTGGAAAGCCTG   | 107 | 92.8 | 18.5 | 54 | 50   | s   | R | 7081.6 | IGGAGTCACTCTGAAAGACGAAA      | T | 7352.8 | IGGAGTCACTCTGAAAGACGAAA      | C | 7368.8 | IGGAGTCACTCTGAAAGACGAAA      |
| W4 | iPLEX | rs72933304  | ACGTTGGATGGGAAAGCTATCCTCAAGGTG | ACGTTGGATGATCTGTTCTGCCCTCAC     | 137 | 94.7 | 18.5 | 58 | 50   | DA  | F | 7174.7 | GTTTCTGCCCTTACCCTTACAA       | C | 7421.9 | GTTTCTGCCCTTACCCTTACAA       | A | 7445.9 | GTTTCTGCCCTTACCCTTACAA       |
| W4 | iPLEX | rs28459062  | ACGTTGGATGAGTCTAGTTCATGGAGAGGG | ACGTTGGATGATCCAGTCCCCTCACTTTC   | 108 | 98.3 | 18.5 | 47 | 30.4 | D   | R | 7236.7 | aCCATCACTTCAATGTTATCTATA     | C | 7507.9 | aCCATCACTTCAATGTTATCTATA     | C | 7523.9 | aCCATCACTTCAATGTTATCTATA     |
| W4 | iPLEX | rs1394263   | ACGTTGGATGCTCATCAGAGTAAATGCTC  | ACGTTGGATGTGGACCTTAGCTGAGTGTG   | 123 | 96.5 | 18.5 | 46 | 26.1 | DA  | R | 7463.9 | gTGAATTAGAATGCATTAGTAAGAA    | T | 7735.1 | gTGAATTAGAATGCATTAGTAAGAA    | C | 7751.1 | gTGAATTAGAATGCATTAGTAAGAA    |
| W4 | iPLEX | rs13103597  | ACGTTGGATGCCCTGCAAACTCTGTCAATC | ACGTTGGATGAAGGGCTACAAAGTTATGG   | 117 | 97.4 | 18.5 | 46 | 24   |     | R | 7654   | TACAAACGTTATGGTTTTAAATATC    | T | 7925.2 | TACAAACGTTATGGTTTTAAATATC    | C | 7941.2 | TACAAACGTTATGGTTTTAAATATC    |
| W4 | iPLEX | rs184142841 | ACGTTGGATGGTTTCTTTAGTACCCTCC   | ACGTTGGATGTCCAAAGAGACATACGG     | 108 | 92.8 | 61.8 | 46 | 20   | D   | R | 7656   | ATGAACACATAAAAAATGTTTCA      | G | 7903.2 | ATGAACACATAAAAAATGTTTCA      | A | 7983.1 | ATGAACACATAAAAAATGTTTCA      |
| W4 | iPLEX | rs75180423  | ACGTTGGATGTGCCATCCAGATGGCAAAC  | ACGTTGGATGGGAAACCTTACTCTAGTGA   | 116 | 93.5 | 18.5 | 45 | 24   | d   | R | 7672   | GATAATTAGTGTCTTACAAATAAA     | C | 7959.2 | GATAATTAGTGTCTTACAAATAAA     | A | 7999.1 | GATAATTAGTGTCTTACAAATAAA     |
| W4 | iPLEX | rs1541255   | ACGTTGGATGTAGCCGTCCGAAGTCTAGAT | ACGTTGGATGTCCACTCAGTCCCCCATC    | 101 | 96.1 | 18.5 | 57 | 50   | DSH | R | 7848.1 | CCGTCCGAAGTCTAGATCTTCTTCC    | G | 8095.3 | CCGTCCGAAGTCTAGATCTTCTTCC    | T | 8119.3 | CCGTCCGAAGTCTAGATCTTCTTCC    |
| W4 | iPLEX | rs142712208 | ACGTTGGATGTTTCTTCTCTGCAGACAC   | ACGTTGGATGGTGTACTAACAATACCAG    | 129 | 86.2 | 18.5 | 45 | 18.5 | A   | F | 8295.4 | CCATTATGATAATTGATGATTAATAAT  | A | 8566.7 | CCATTATGATAATTGATGATTAATAAT  | G | 8582.7 | CCATTATGATAATTGATGATTAATAAT  |
| W4 | iPLEX | rs114980857 | ACGTTGGATGGTCCACTTTCTAGGTCC    | ACGTTGGATGGAGTCCAGGCTGATAAGGTC  | 85  | 96.3 | 18.5 | 56 | 44.4 | d   | F | 8421.5 | GATAAGGTTTCACATGGAGATGAGGAA  | C | 8668.7 | GATAAGGTTTCACATGGAGATGAGGAA  | T | 8748.6 | GATAAGGTTTCACATGGAGATGAGGAA  |
| W4 | iPLEX | rs75731597  | ACGTTGGATGGTTCACATAAGATATGACTG | ACGTTGGATGTGCTTCCATCACAACCTG    | 113 | 85.3 | 85.3 | 45 | 14.3 |     | F | 8547.6 | TGTTTTAATTAATTTCTCTGAAATTA   | C | 8794.8 | TGTTTTAATTAATTTCTCTGAAATTA   | A | 8818.8 | TGTTTTAATTAATTTCTCTGAAATTA   |
| W4 | iPLEX | rs74954675  | ACGTTGGATGTTAAGGCATGCAGAGGTTG  | ACGTTGGATGTACATTTTAAAGAGAG      | 135 | 66.3 | 18.5 | 47 | 21.4 | dA  | R | 8611.7 | GAAAAATCTTTAAATGATCACAATG    | C | 8898.9 | GAAAAATCTTTAAATGATCACAATG    | A | 8938.8 | GAAAAATCTTTAAATGATCACAATG    |

Assay definitions for the Agena iPLEX Mass-Array genotyping platform for the 129 SNPs investigated in this study. The designs were undertaken using the MassARRAY® Assay Design 3.1 software, which grouped the assays into 4 multiplexes assigned W1 - W4 (WELL column). Field definitions are as per the Agena assay design software users' guide (MassARRAY® Assay Design 3.1, Sequenom Inc., San Diego, Ca, USA).

Table S2: Assay definitions for the Agena iPLEX genotyping platform.

| Gene      | SNPID       | Alleles<br>(ancestral<br>/ derived) | Chr | DAF<br>Controls | No. of<br>genotype<br>in controls | Sample | Case<br>Phenotype | DAF<br>Cases | No. of<br>genotypes<br>in cases | MO | Unadjusted <sup>§</sup> |      |      |                        | Adjusted <sup>§</sup> |      |      |                        |
|-----------|-------------|-------------------------------------|-----|-----------------|-----------------------------------|--------|-------------------|--------------|---------------------------------|----|-------------------------|------|------|------------------------|-----------------------|------|------|------------------------|
|           |             |                                     |     |                 |                                   |        |                   |              |                                 |    | OR                      | LCL  | UCL  | P                      | OR                    | LCL  | UCL  | P                      |
| AJAP1     | rs113788643 | A/G                                 | 1   | 0.08            | 3940                              | All    | SM                | 0.07         | 2215                            | A  | 0.95                    | 0.82 | 1.09 | 0.4382                 | 0.92                  | 0.79 | 1.06 | 0.4900                 |
| AJAP1     | rs6674631   | G/A                                 | 1   | 0.13            | 3928                              | All    | SM                | 0.12         | 2212                            | A  | 0.89                    | 0.79 | 1.00 | 0.0434                 | 0.88                  | 0.78 | 1.00 | 0.04                   |
| ATP2B4    | rs10900585  | G/T                                 | 1   | 0.34            | 3762                              | All    | SM                | 0.33         | 2200                            | R  | 1.29                    | 1.07 | 1.56 | 0.0056                 | 1.23                  | 1.10 | 1.81 | 0.0090                 |
| ATP2B4    | rs1541255   | A/G                                 | 1   | 0.33            | 3933                              | All    | SM                | 0.31         | 2211                            | R  | 0.74                    | 0.62 | 0.89 | 0.0012                 | 0.76                  | 0.63 | 0.92 | 0.001                  |
| ATP2B4    | rs3753036   | G/A                                 | 1   | 0.04            | 3939                              | All    | SM                | 0.04         | 2217                            | R  | 1.60                    | 0.42 | 6.07 | 0.4940                 | 1.25                  | 0.28 | 5.49 | 0.8400                 |
| ATP2B4    | rs4951074   | G/A                                 | 1   | 0.32            | 3934                              | All    | SM                | 0.31         | 2215                            | R  | 0.77                    | 0.64 | 0.93 | 0.0068                 | 0.77                  | 0.65 | 0.94 | 0.007                  |
| ATP2B4    | rs55868763  | G/C                                 | 1   | 0.33            | 3931                              | All    | SM                | 0.31         | 2209                            | R  | 0.74                    | 0.62 | 0.89 | 0.0013                 | 0.75                  | 0.61 | 0.92 | 0.0010                 |
| CR1       | rs17047660  | A/G                                 | 1   | 0.16            | 3923                              | All    | SM                | 0.17         | 2228                            | R  | 1.24                    | 0.90 | 1.72 | 0.1932                 | 1.14                  | 0.81 | 1.61 | 0.18                   |
| CR1       | rs17047661  | G/A                                 | 1   | 0.32            | 3934                              | All    | SM                | 0.33         | 2223                            | A  | 1.07                    | 0.98 | 1.15 | 0.1249                 | 1.06                  | 0.98 | 1.16 | 0.1300                 |
| DARC      | rs2814778   | G/A                                 | 1   | 0.00            | 3944                              | All    | SM                | 0.00         | 1933                            | H  | 0.83                    | 0.33 | 2.10 | 0.6934                 | 0.77                  | 0.30 | 1.97 | 0.69                   |
| GBP7      | rs1803632   | G/C                                 | 1   | 0.49            | 3942                              | All    | SM                | 0.51         | 2230                            | R  | 1.11                    | 0.98 | 1.25 | 0.0940                 | 1.10                  | 0.96 | 1.25 | 0.1200                 |
| IL10      | rs1800890   | A/T                                 | 1   | 0.24            | 3945                              | All    | SM                | 0.23         | 2233                            | R  | 0.69                    | 0.55 | 0.88 | 0.0025                 | 0.72                  | 0.56 | 0.93 | 0.002                  |
| IL10      | rs1800896   | T/C                                 | 1   | 0.38            | 3943                              | All    | SM                | 0.36         | 2225                            | R  | 0.90                    | 0.77 | 1.05 | 0.1961                 | 0.91                  | 0.77 | 1.07 | 0.2200                 |
| IL10      | rs3024500   | G/A                                 | 1   | 0.45            | 3928                              | All    | SM                | 0.47         | 2226                            | R  | 1.18                    | 1.04 | 1.34 | 0.0129                 | 1.17                  | 1.02 | 1.33 | 0.01                   |
| LPHN2     | rs146428334 | A/G                                 | 1   | 0.00            | 3930                              | All    | SM                | 0.00         | 2216                            | H  | 1.29                    | 0.74 | 2.23 | 0.3751                 | 1.30                  | 0.74 | 2.30 | 0.3600                 |
| LPHN2     | rs4650365   | T/C                                 | 1   | 0.20            | 3936                              | All    | SM                | 0.19         | 2215                            | H  | 0.85                    | 0.76 | 0.95 | 0.0050                 | 0.86                  | 0.76 | 0.97 | 0.003                  |
| LPHN2     | rs72933304  | C/A                                 | 1   | 0.09            | 3942                              | All    | SM                | 0.07         | 2216                            | A  | 0.80                    | 0.69 | 0.92 | 0.0019                 | 0.83                  | 0.72 | 0.96 | 0.0020                 |
| LPHN2     | rs72933310  | T/C                                 | 1   | 0.09            | 3927                              | All    | SM                | 0.08         | 2214                            | A  | 0.85                    | 0.74 | 0.97 | 0.0158                 | 0.87                  | 0.75 | 0.98 | 0.01                   |
| LPHN2     | rs72933350  | T/C                                 | 1   | 0.05            | 3940                              | All    | SM                | 0.04         | 2215                            | D  | 0.75                    | 0.62 | 0.92 | 0.0037                 | 0.82                  | 0.67 | 0.94 | 0.0040                 |
| IL1A      | rs17561     | G/T                                 | 2   | 0.16            | 3938                              | All    | SM                | 0.18         | 2232                            | R  | 1.47                    | 1.08 | 2.00 | 0.0152                 | 1.49                  | 1.08 | 2.05 | 0.01                   |
| IL1B      | rs1143634   | C/T                                 | 2   | 0.11            | 3941                              | All    | SM                | 0.13         | 2229                            | A  | 1.08                    | 0.96 | 1.21 | 0.1850                 | 1.06                  | 0.94 | 1.19 | 0.2300                 |
| LAPTM4A   | rs973128    | C/G                                 | 2   | 0.44            | 3885                              | All    | SM                | 0.44         | 2183                            | H  | 1.03                    | 0.92 | 1.14 | 0.6460                 | 0.98                  | 0.87 | 1.11 | 0.68                   |
| LOC727982 | rs10188961  | A/G                                 | 2   | 0.40            | 3934                              | All    | SM                | 0.42         | 2211                            | D  | 1.21                    | 1.08 | 1.35 | 0.0009                 | 1.14                  | 1.05 | 1.24 | 0.0007                 |
| LOC727982 | rs1371474   | T/C                                 | 2   | 0.27            | 3933                              | All    | SM                | 0.29         | 2216                            | H  | 1.29                    | 1.16 | 1.43 | 4.19×10 <sup>-6</sup>  | 1.34                  | 1.19 | 1.50 | 3.86×10 <sup>-6</sup>  |
| LOC727982 | rs1371478   | C/T                                 | 2   | 0.27            | 3909                              | All    | SM                | 0.29         | 2209                            | H  | 1.30                    | 1.17 | 1.45 | 1.90×10 <sup>-6</sup>  | 1.35                  | 1.20 | 1.51 | 2.31×10 <sup>-6</sup>  |
| SDC1      | rs11899121  | C/G                                 | 2   | 0.47            | 3921                              | All    | SM                | 0.47         | 2210                            | H  | 1.06                    | 0.96 | 1.18 | 0.2570                 | 1.06                  | 0.95 | 1.19 | 0.23                   |
| ZSWIM2    | rs144778284 | C/T                                 | 2   | 0.00            | 3937                              | All    | SM                | 0.00         | 2216                            | R  | -                       | -    | -    | -                      | -                     | -    | -    | -                      |
| ZSWIM2    | rs4316902   | A/G                                 | 2   | 0.18            | 3910                              | All    | SM                | 0.17         | 2205                            | R  | 0.79                    | 0.57 | 1.08 | 0.1344                 | 0.81                  | 0.58 | 1.14 | 0.12                   |
| ARL14     | rs74954675  | A/C                                 | 3   | 0.08            | 3907                              | All    | SM                | 0.10         | 2200                            | H  | 1.24                    | 1.07 | 1.43 | 0.0039                 | 1.22                  | 1.05 | 1.42 | 0.0030                 |
| ARL14     | rs75731597  | A/C                                 | 3   | 0.08            | 3491                              | All    | SM                | 0.10         | 2173                            | H  | 1.27                    | 1.10 | 1.47 | 0.0013                 | 1.25                  | 1.07 | 1.46 | 0.001                  |
| ARL14     | rs76033371  | A/G                                 | 3   | 0.09            | 3939                              | All    | SM                | 0.10         | 2207                            | H  | 1.22                    | 1.06 | 1.40 | 0.0060                 | 1.19                  | 1.03 | 1.38 | 0.0060                 |
| B3GALNT1  | rs12107243  | G/C                                 | 3   | 0.49            | 3934                              | All    | SM                | 0.49         | 2213                            | D  | 0.95                    | 0.84 | 1.08 | 0.4393                 | 0.97                  | 0.85 | 1.10 | 0.45                   |
| IL17RD    | rs6780995   | A/G                                 | 3   | 0.41            | 3939                              | All    | SM                | 0.40         | 2230                            | R  | 0.90                    | 0.78 | 1.03 | 0.1283                 | 0.91                  | 0.79 | 1.06 | 0.1700                 |
| IL17RE    | rs708567    | A/G                                 | 3   | 0.50            | 3881                              | All    | SM                | 0.50         | 2221                            | R  | 0.97                    | 0.86 | 1.10 | 0.6779                 | 0.98                  | 0.86 | 1.12 | 0.66                   |
| TLR9      | rs187084    | T/C                                 | 3   | 0.33            | 3933                              | All    | SM                | 0.32         | 1937                            | A  | 0.95                    | 0.88 | 1.04 | 0.2620                 | 0.92                  | 0.84 | 1.00 | 0.2200                 |
| FREM3     | rs149914432 | A/C                                 | 4   | 0.10            | 3915                              | All    | SM                | 0.06         | 2202                            | A  | 0.60                    | 0.51 | 0.69 | 8.57×10 <sup>-13</sup> | 0.64                  | 0.53 | 0.78 | 6.20×10 <sup>-13</sup> |
| FREM3     | rs184895969 | C/T                                 | 4   | 0.00            | 3940                              | All    | SM                | 0.00         | 2217                            | H  | 0.83                    | 0.45 | 1.53 | 0.5508                 | 1.00                  | 0.51 | 1.94 | 0.5600                 |
| FREM3     | rs184908374 | G/A                                 | 4   | 0.00            | 3943                              | All    | SM                | 0.00         | 2217                            | H  | 0.95                    | 0.50 | 1.82 | 0.8842                 | 1.14                  | 0.56 | 2.30 | 0.9                    |
| FREM3     | rs186790584 | A/T                                 | 4   | 0.10            | 3941                              | All    | SM                | 0.06         | 2217                            | A  | 0.59                    | 0.50 | 0.68 | 2.71×10 <sup>-13</sup> | 0.60                  | 0.51 | 0.7  | 2.24×10 <sup>-13</sup> |
| FREM3     | rs186873296 | A/G                                 | 4   | 0.10            | 3926                              | All    | SM                | 0.06         | 2206                            | A  | 0.57                    | 0.49 | 0.66 | 4.23×10 <sup>-14</sup> | 0.64                  | 0.53 | 0.79 | 3.18×10 <sup>-14</sup> |
| GAB1      | rs7663712   | A/G                                 | 4   | 0.02            | 3938                              | All    | SM                | 0.03         | 2216                            | H  | 1.09                    | 0.86 | 1.39 | 0.4862                 | 1.04                  | 0.81 | 1.31 | 0.4830                 |
| INPP4B    | rs13103597  | C/T                                 | 4   | 0.27            | 3925                              | All    | SM                | 0.23         | 2215                            | A  | 0.82                    | 0.75 | 0.89 | 7.41×10 <sup>-6</sup>  | 0.89                  | 0.80 | 0.98 | 6.29×10 <sup>-6</sup>  |
| INPP4B    | rs77389579  | G/T                                 | 4   | 0.07            | 3937                              | All    | SM                | 0.04         | 2209                            | A  | 0.61                    | 0.51 | 0.72 | 4.48×10 <sup>-9</sup>  | 0.64                  | 0.53 | 0.77 | 4.79×10 <sup>-9</sup>  |
| TLR1      | rs4833095   | C/T                                 | 4   | 0.09            | 3921                              | All    | SM                | 0.10         | 1936                            | R  | 1.49                    | 0.87 | 2.57 | 0.1519                 | 1.26                  | 0.70 | 2.26 | 0.15                   |
| TLR6      | rs5743809   | T/C                                 | 4   | 0.06            | 3884                              | All    | SM                | 0.06         | 1847                            | R  | 1.41                    | 0.62 | 3.21 | 0.4159                 | 1.52                  | 0.65 | 3.56 | 0.4120                 |
| TLR6      | rs5743810   | C/T                                 | 4   | 0.02            | 3936                              | All    | SM                | 0.01         | 1940                            | R  | -                       | -    | -    | -                      | -                     | -    | -    | -                      |
| USP38     | rs28459062  | T/C                                 | 4   | 0.16            | 3931                              | All    | SM                | 0.18         | 2217                            | A  | 1.14                    | 1.03 | 1.26 | 0.0095                 | 1.10                  | 1.10 | 1.27 | 0.0100                 |
| USP38     | rs4266246   | C/T                                 | 4   | 0.22            | 3928                              | All    | SM                | 0.22         | 2212                            | R  | 1.09                    | 0.86 | 1.40 | 0.4724                 | 1.02                  | 0.79 | 1.31 | 0.416                  |
| C6        | rs1801033   | A/C                                 | 5   | 0.47            | 3927                              | All    | SM                | 0.47         | 1933                            | A  | 0.99                    | 0.92 | 1.07 | 0.8171                 | 0.99                  | 0.91 | 1.07 | 0.8230                 |
| IL13      | rs20541     | C/T                                 | 5   | 0.22            | 3796                              | All    | SM                | 0.21         | 1850                            | R  | 0.88                    | 0.67 | 1.14 | 0.3288                 | 0.86                  | 0.65 | 1.14 | 0.39                   |
| IRF1      | rs2706384   | C/A                                 | 5   | 0.38            | 3819                              | All    | SM                | 0.36         | 1886                            | A  | 0.95                    | 0.87 | 1.03 | 0.1835                 | 0.94                  | 0.86 | 1.02 | 0.2140                 |
| CTL4      | rs2242665   | A/G                                 | 6   | 0.26            | 3853                              | All    | SM                | 0.27         | 1911                            | R  | 1.16                    | 0.94 | 1.43 | 0.1737                 | 1.15                  | 0.92 | 1.43 | 0.17                   |
| GABBR1    | rs192151845 | G/A                                 | 6   | 0.01            | 3943                              | All    | SM                | 0.01         | 2212                            | H  | 1.07                    | 0.69 | 1.66 | 0.7515                 | 1.07                  | 0.68 | 1.69 | 0.8300                 |
| HCG4      | rs114980857 | C/T                                 | 6   | 0.21            | 3843                              | All    | SM                | 0.22         | 2188                            | H  | 1.04                    | 0.93 | 1.17 | 0.4713                 | 1.01                  | 0.89 | 1.14 | 0.495                  |
| HSPA1B    | rs6457452   | C/T                                 | 6   | 0.19            | 3917                              | All    | SM                | 0.18         | 2212                            | D  | 0.88                    | 0.79 | 0.98 | 0.0243                 | 0.88                  | 0.78 | 0.99 | 0.0200                 |
| IL20RA    | rs1555498   | C/T                                 | 6   | 0.46            | 3947                              | All    | SM                | 0.49         | 2228                            | A  | 1.05                    | 0.98 | 1.13 | 0.1810                 | 1.06                  | 0.98 | 1.14 | 0.179                  |
| LTA       | rs2239704   | G/T                                 | 6   | 0.12            | 3896                              | All    | SM                | 0.13         | 2187                            | D  | 1.07                    | 0.95 | 1.21 | 0.2709                 | 1.03                  | 0.90 | 1.18 | 0.3110                 |
| LTA       | rs909253    | T/C                                 | 6   | 0.49            | 3921                              | All    | SM                | 0.49         | 2216                            | H  | 1.03                    | 0.92 | 1.14 | 0.6090                 | 1.06                  | 0.95 | 1.19 | 0.501                  |
| PLEKHG1   | rs114726617 | G/A                                 | 6   | 0.04            | 3940                              | All    | SM                | 0.04         | 2217                            | A  | 1.15                    | 0.95 | 1.39 | 0.1474                 | 1.20                  | 0.98 | 1.47 | 0.1720                 |
| PLEKHG1   | rs141555199 | C/G                                 | 6   | 0.02            | 3943                              | All    | SM                | 0.02         | 2218                            | R  | 0.00                    | 0.00 | -    | 0.1424                 | -                     | -    | -    | -                      |
| PLEKHG1   | rs142712208 | G/A                                 | 6   | 0.03            | 3927                              | All    | SM                | 0.04         | 2218                            | A  | 1.18                    | 0.96 | 1.44 | 0.1147                 | 1.27                  | 1.02 | 1.57 | 0.1160                 |
| PLEKHG1   | rs15116938  | C/T                                 | 6   | 0.03            | 3939                              | All    | SM                | 0.04         | 2216                            | A  | 1.13                    | 0.93 | 1.39 | 0.2207                 | 1.23                  | 0.99 | 1.52 | 0.225                  |
| PLEKHG1   | rs151293197 | C/G                                 | 6   | 0.03            | 3940                              | All    | SM                | 0.04         | 2217                            | A  | 1.12                    | 0.91 | 1.37 | 0.2790                 | 1.19                  | 0.96 | 1.48 | 0.2850                 |
| PLEKHG1   | rs2131263   | C/T                                 | 6   | 0.04            | 3938                              | All    | SM                | 0.04         | 2216                            | A  | 1.14                    | 0.95 | 1.38 | 0.1629                 | 1.20                  | 0.98 | 1.46 | 0.172                  |
| PLEKHG1   | rs55958968  | A/G                                 | 6   | 0.05            | 3932                              | All    | SM                | 0.06         | 2217                            | H  | 1.20                    | 1.01 | 1.43 | 0.0376                 | 1.21                  | 1.01 | 1.45 | 0.0300                 |
| PLEKHG1   | rs76924464  | G/A                                 | 6   | 0.03            | 3940                              | All    | SM                | 0.04         | 2217                            | A  | 1.12                    | 0.92 | 1.37 | 0.2673                 | 1.20                  | 0.97 | 1.48 | 0.273                  |
| PLEKHG1   | rs79100774  | G/C                                 | 6   | 0.03            | 3939                              | All    | SM                | 0.04         | 2217                            | A  | 1.11                    | 0.91 | 1.36 | 0.2934                 | 1.20                  | 0.97 | 1.48 | 0.2980                 |
| SNORD48   | rs116288147 | C/T                                 | 6   | 0.24            | 3896                              | All    | SM                | 0.23         | 2191                            | D  | 0.93                    | 0.83 | 1.03 | 0.1621                 | 0.92                  | 0.82 | 1.04 | 0.138                  |
| TNF       | rs1799964   | T/C                                 | 6   | 0.27            | 3938                              | All    | SM                | 0.27         | 2204                            | H  | 0.95                    | 0.86 | 1.06 | 0.3902                 | 0.94                  | 0.83 | 1.05 | 0.4240                 |
| TNF       | rs1800629   | G/A                                 | 6   | 0.09            | 3940                              | All    | SM                | 0.09         | 2230                            | H  | 0.92                    | 0.80 | 1.06 | 0.2422                 | 0.92                  | 0.80 | 1.07 | 0.286                  |
| TNF       | rs1800750   | G/A                                 | 6   | 0.05            | 3868                              | All    | SM                | 0.05         | 1281                            | A  | 0.94                    | 0.77 | 1.16 | 0.5740                 | 0.93                  | 0.74 | 1.17 | 0.5100                 |
| TNF       | rs3093662   | A/G                                 | 6   | 0.11            | 3936                              | All    | SM                | 0.11         | 2219                            | R  | 0.75                    | 0.45 | 1.23 | 0.2424                 | 0.74                  | 0.45 | 1.23 | 0.247                  |
| TNF       | rs361525    | G/A                                 | 6   | 0.07            | 3948                              | All    | SM                | 0.07         | 2224                            | R  | 0.66                    | 0.29 | 1.4  |                        |                       |      |      |                        |



|                |                                 |     |    |      |      |     |    |      |      |    |      |      |       |                        |      |      |       |                        |
|----------------|---------------------------------|-----|----|------|------|-----|----|------|------|----|------|------|-------|------------------------|------|------|-------|------------------------|
| <i>MKI67</i>   | rs148494166                     | T/C | 10 | 0.00 | 3913 | All | SM | 0.00 | 2137 | H  | 1.36 | 0.63 | 2.91  | 0.4401                 | 1.16 | 0.53 | 2.56  | 0.427                  |
| <i>MKI67</i>   | rs11016116                      | A/G | 10 | 0.02 | 3944 | All | SM | 0.02 | 2218 | R  | 1.65 | 0.41 | 6.68  | 0.4877                 | 1.84 | 0.42 | 8.00  | 0.4810                 |
| <i>MKI67</i>   | rs115947774                     | A/G | 10 | 0.00 | 3931 | All | SM | 0.00 | 2206 | H  | 0.49 | 0.23 | 1.06  | 0.0564                 | 0.48 | 0.22 | 1.05  | 0.05                   |
| <i>HBB</i>     | rs334                           | A/T | 11 | 0.08 | 3949 | All | SM | 0.02 | 2227 | H  | 0.14 | 0.12 | 0.21  | 6.81×10 <sup>-59</sup> | 0.15 | 0.11 | 0.20  | 2.61×10 <sup>-58</sup> |
| <i>RRM1</i>    | rs116472045                     | A/G | 11 | 0.02 | 3939 | All | SM | 0.02 | 2213 | R  | -    | -    | -     | -                      | -    | -    | -     | -                      |
| <i>RTN3</i>    | rs542998                        | T/C | 11 | 0.43 | 3929 | All | SM | 0.44 | 1911 | D  | 1.06 | 0.94 | 1.20  | 0.3118                 | 1.09 | 0.96 | 1.23  | 0.2660                 |
| <i>TRIM5</i>   | rs7935564                       | G/A | 11 | 0.44 | 3871 | All | SM | 0.46 | 1930 | A  | 1.08 | 1.00 | 1.17  | 0.0473                 | 1.00 | 0.92 | 1.09  | 0.044                  |
| <i>CAND1</i>   | rs10459266                      | C/A | 12 | 0.21 | 3938 | All | SM | 0.22 | 2217 | D  | 1.14 | 1.02 | 1.27  | 0.0179                 | 1.13 | 1.01 | 1.27  | 0.0130                 |
| <i>CAND1</i>   | rs12307123                      | C/T | 12 | 0.23 | 3933 | All | SM | 0.24 | 2216 | A  | 1.09 | 1.00 | 1.19  | 0.0566                 | 1.11 | 0.99 | 1.24  | 0.04                   |
| <i>CAND1</i>   | rs1566830                       | G/T | 12 | 0.26 | 3940 | All | SM | 0.28 | 2215 | A  | 1.11 | 1.02 | 1.20  | 0.0188                 | 1.09 | 1.00 | 1.20  | 0.0150                 |
| <i>GRIP1</i>   | rs1394263                       | T/C | 12 | 0.26 | 3914 | All | SM | 0.28 | 2205 | A  | 1.11 | 1.02 | 1.21  | 0.0150                 | 1.10 | 1.01 | 1.20  | 0.012                  |
| <i>IL22</i>    | rs1012356                       | A/T | 12 | 0.49 | 3940 | All | SM | 0.48 | 2225 | H  | 1.08 | 0.97 | 1.20  | 0.1519                 | 1.07 | 0.96 | 1.20  | 0.1480                 |
| <i>IL22</i>    | rs2227478                       | A/G | 12 | 0.38 | 3939 | All | SM | 0.39 | 2230 | R  | 0.97 | 0.84 | 1.13  | 0.7107                 | 0.95 | 0.81 | 1.11  | 0.688                  |
| <i>IL22</i>    | rs2227485                       | G/A | 12 | 0.42 | 3928 | All | SM | 0.41 | 2221 | R  | 0.86 | 0.75 | 0.99  | 0.0402                 | 0.84 | 0.72 | 0.97  | 0.0370                 |
| <i>IL22</i>    | rs2227491                       | C/T | 12 | 0.40 | 3870 | All | SM | 0.42 | 2192 | D  | 1.09 | 0.98 | 1.22  | 0.1196                 | 1.07 | 0.95 | 1.20  | 0.1                    |
| <i>IL22</i>    | rs2227507                       | T/C | 12 | 0.04 | 3948 | All | SM | 0.04 | 2235 | A  | 0.96 | 0.80 | 1.16  | 0.6840                 | 0.96 | 0.79 | 1.17  | 0.7360                 |
| <i>TPTE2</i>   | rs182873742                     | C/G | 13 | 0.00 | 3940 | All | SM | 0.00 | 2202 | H  | 4.92 | 0.50 | 48.34 | 0.1362                 | 4.92 | 0.40 | 60.10 | 0.133                  |
| <i>RPS6KL1</i> | rs3742785                       | C/A | 14 | 0.29 | 3714 | All | SM | 0.30 | 2115 | H  | 1.20 | 1.08 | 1.34  | 0.0010                 | 1.18 | 1.05 | 1.33  | 0.0016                 |
| <i>SPTB</i>    | rs229587                        | T/C | 14 | 0.34 | 3872 | All | SM | 0.34 | 2167 | A  | 1.02 | 0.94 | 1.10  | 0.6677                 | 1.01 | 0.93 | 1.09  | 0.637                  |
| <i>YLFM1</i>   | rs10139016                      | C/T | 14 | 0.25 | 3937 | All | SM | 0.27 | 2214 | D  | 1.12 | 1.01 | 1.25  | 0.0313                 | 1.11 | 0.99 | 1.24  | 0.0300                 |
| <i>ADCY9</i>   | rs10775349                      | C/G | 16 | 0.20 | 3941 | All | SM | 0.20 | 1937 | R  | 1.09 | 0.82 | 1.44  | 0.5625                 | 1.11 | 0.83 | 1.50  | 0.614                  |
| <i>ADCY9</i>   | rs2230739                       | A/G | 16 | 0.09 | 3944 | All | SM | 0.08 | 1940 | H  | 0.87 | 0.74 | 1.01  | 0.0689                 | 0.83 | 0.70 | 0.97  | 0.0500                 |
| <i>HBA</i>     | α <sup>-3.7</sup> -thalassaemia | I/D | 16 | 0.41 | 3946 | All | SM | 0.36 | 2143 | A  | 0.82 | 0.76 | 0.89  | 6.59×10 <sup>-7</sup>  | 0.83 | 0.76 | 0.90  | 2.06×10 <sup>-6</sup>  |
| <i>IL4</i>     | rs2243250                       | T/C | 16 | 0.20 | 3902 | All | SM | 0.22 | 2205 | H  | 1.11 | 0.99 | 1.24  | 0.0632                 | 1.09 | 0.97 | 1.23  | 0.0500                 |
| <i>IL4R</i>    | rs1805015                       | T/C | 16 | 0.42 | 3927 | All | SM | 0.43 | 2228 | H  | 1.05 | 0.94 | 1.17  | 0.3772                 | 1.05 | 0.94 | 1.18  | 0.368                  |
| <i>ADORA2B</i> | rs2535611                       | T/C | 17 | 0.10 | 3911 | All | SM | 0.11 | 1935 | A  | 1.08 | 0.96 | 1.23  | 0.2005                 | 1.06 | 0.93 | 1.21  | 0.2020                 |
| <i>NOS2</i>    | rs1800482                       | G/C | 17 | 0.08 | 3922 | All | SM | 0.07 | 2220 | A  | 0.97 | 0.84 | 1.12  | 0.6718                 | 0.95 | 0.82 | 1.10  | 0.581                  |
| <i>NOS2</i>    | rs2297518                       | G/A | 17 | 0.14 | 3910 | All | SM | 0.13 | 1924 | D  | 0.95 | 0.84 | 1.08  | 0.4227                 | 0.96 | 0.84 | 1.10  | 0.4430                 |
| <i>NOS2</i>    | rs8078340                       | C/T | 17 | 0.21 | 3948 | All | SM | 0.21 | 2233 | R  | 0.82 | 0.62 | 1.09  | 0.1624                 | 0.78 | 0.58 | 1.04  | 0.146                  |
| <i>NOS2</i>    | rs9282799                       | C/T | 17 | 0.03 | 3949 | All | SM | 0.03 | 2224 | H  | 1.14 | 0.91 | 1.44  | 0.2515                 | 1.13 | 0.88 | 1.44  | 0.2990                 |
| <i>TBX2</i>    | rs73991577                      | A/G | 17 | 0.00 | 3937 | All | SM | 0.00 | 2215 | H  | 0.48 | 0.19 | 1.20  | 0.0976                 | 0.52 | 0.20 | 1.34  | 0.1                    |
| <i>EMR1</i>    | rs373533                        | G/T | 19 | 0.46 | 3863 | All | SM | 0.49 | 1927 | A  | 1.09 | 1.01 | 1.18  | 0.0345                 | 1.07 | 0.99 | 1.17  | 0.0400                 |
| <i>EMR1</i>    | rs461645                        | C/T | 19 | 0.47 | 3933 | All | SM | 0.49 | 1939 | A  | 1.09 | 1.00 | 1.17  | 0.0374                 | 1.07 | 0.99 | 1.16  | 0.048                  |
| <i>ICAM</i>    | rs5498                          | A/G | 19 | 0.11 | 3908 | All | SM | 0.12 | 2197 | H  | 1.05 | 0.93 | 1.20  | 0.4327                 | 1.03 | 0.89 | 1.18  | 0.4550                 |
| <i>GNAS</i>    | rs8386                          | C/T | 20 | 0.19 | 3944 | All | SM | 0.19 | 2229 | H  | 0.91 | 0.81 | 1.02  | 0.1060                 | 0.92 | 0.82 | 1.04  | 0.11                   |
| <i>DERL3</i>   | rs1128127                       | G/A | 22 | 0.50 | 3911 | All | SM | 0.47 | 2226 | A  | 0.94 | 0.88 | 1.02  | 0.1241                 | 0.93 | 0.86 | 1.01  | 0.1250                 |
| <i>CD40LG</i>  | rs1126535                       | T/C | X  | 0.15 | 3934 | M+F | SM | 0.16 | 2230 | H  | 0.86 | 0.72 | 1.02  | 0.0843                 | 0.85 | 0.71 | 1.03  | 0.09                   |
| <i>CD40LG</i>  | rs1126535                       | T/C | X  | 0.16 | 1947 | F   | SM | 0.14 | 1080 | A  | 0.85 | 0.73 | 0.99  | 0.0325                 | 0.87 | 0.76 | 1.00  | 0.0425                 |
| <i>CD40LG</i>  | rs1126535                       | C/T | X  | 0.85 | 1987 | M   | SM | 0.83 | 1150 | HM | 0.84 | 0.69 | 1.03  | 0.0903                 | 0.85 | 0.70 | 1.04  | 0.100257               |
| <i>CD40LG</i>  | rs3092945                       | T/C | X  | 0.21 | 3927 | M+F | SM | 0.26 | 2226 | A  | 1.14 | 1.07 | 1.23  | 0.0002                 | 1.15 | 1.06 | 1.23  | 0.0002                 |
| <i>CD40LG</i>  | rs3092945                       | T/C | X  | 0.21 | 1942 | F   | SM | 0.25 | 1082 | A  | 1.25 | 1.10 | 1.42  | 0.0004                 | 1.28 | 1.13 | 1.45  | 0.0002                 |
| <i>CD40LG</i>  | rs3092945                       | C/T | X  | 0.78 | 1985 | M   | SM | 0.74 | 1144 | HM | 0.83 | 0.70 | 0.99  | 0.0338                 | 0.80 | 0.68 | 0.95  | 0.0100                 |
| <i>G6PD</i>    | rs1050828                       | C/T | X  | 0.19 | 3940 | M+F | SM | 0.19 | 2220 | H  | 0.82 | 0.69 | 0.96  | 0.0153                 | 0.80 | 0.68 | 0.96  | 0.015                  |
| <i>G6PD</i>    | rs1050828                       | C/T | X  | 0.20 | 1951 | F   | SM | 0.18 | 1074 | H  | 0.82 | 0.70 | 0.97  | 0.0100                 | 0.81 | 0.69 | 0.96  | 0.0100                 |
| <i>G6PD</i>    | rs1050828                       | C/T | X  | 0.19 | 1989 | M   | SM | 0.20 | 1146 | HM | 1.11 | 0.92 | 1.34  | 0.2686                 | 1.08 | 0.90 | 1.30  | 0.36                   |
| <i>G6PD</i>    | rs1050829                       | T/C | X  | 0.40 | 3928 | M+F | SM | 0.42 | 2221 | H  | 0.85 | 0.73 | 0.99  | 0.0342                 | 0.86 | 0.73 | 1.01  | 0.0540                 |
| <i>G6PD</i>    | rs1050829                       | T/C | X  | 0.41 | 1952 | F   | SM | 0.41 | 1075 | H  | 0.85 | 0.73 | 0.99  | 0.0358                 | 0.86 | 0.74 | 1.00  | 0.04581                |
| <i>G6PD</i>    | rs1050829                       | C/T | X  | 0.60 | 1976 | M   | SM | 0.58 | 1146 | HM | 0.90 | 0.77 | 1.04  | 0.1486                 | 0.93 | 0.79 | 1.05  | 0.1526                 |

\* The rs176719 polymorphism identifies blood-group O in the homozygous deletion form. The derived allele of rs176746 identifies blood-group B. Chr = chromosome; DAF = derived allele frequency; MO = genotype model [A – additive, D – dominant, H – heterozygote, HM – hemizygous males, R – recessive] with respect to the derived allele; OR = Odds Ratio; LCI = Lower Confidence Interval (95%); UCI = Upper Confidence Interval; P = p-value using a logistic regression model as described in methods. § ORs and p-values unadjusted and adjusted for ethnic group, gender and rs334 genotype.

**Table S3: Odds ratios for all SM for all polymorphisms investigated.**

| Gene      | SNPID       | Alleles<br>(ancestral/<br>derived) | Chr | DAF<br>Controls | No. of<br>genotype<br>in controls | Sample | Case<br>Phenotype | DAF<br>Cases | No. of<br>genotypes<br>in cases | MO | Unadjusted |      |      |                       | Adjusted <sup>s</sup> |      |      |                       |
|-----------|-------------|------------------------------------|-----|-----------------|-----------------------------------|--------|-------------------|--------------|---------------------------------|----|------------|------|------|-----------------------|-----------------------|------|------|-----------------------|
|           |             |                                    |     |                 |                                   |        |                   |              |                                 |    | OR         | LCL  | UCL  | P                     | OR                    | LCL  | UCL  | P                     |
| AJAP1     | rs113788643 | A/G                                | 1   | 0.08            | 3940                              | All    | CM                | 0.07         | 1231                            | H  | 0.94       | 0.77 | 1.13 | 0.5004                | 0.92                  | 0.76 | 1.12 | 0.5601                |
| AJAP1     | rs6674631   | G/A                                | 1   | 0.13            | 3928                              | All    | CM                | 0.11         | 1225                            | A  | 0.83       | 0.72 | 0.96 | 0.0100                | 0.83                  | 0.71 | 0.96 | 0.01161               |
| ATP2B4    | rs10900585  | G/T                                | 1   | 0.34            | 3762                              | All    | CM                | 0.32         | 1223                            | R  | 1.21       | 1.06 | 1.54 | 0.0210                | 1.39                  | 0.89 | 2.18 | 0.0187                |
| ATP2B4    | rs1541255   | A/G                                | 1   | 0.33            | 3933                              | All    | CM                | 0.30         | 1226                            | R  | 0.68       | 0.54 | 0.86 | 0.0011                | 0.69                  | 0.54 | 0.89 | 0.0011                |
| ATP2B4    | rs3753036   | G/A                                | 1   | 0.04            | 3939                              | All    | CM                | 0.04         | 1229                            | R  | 2.16       | 0.50 | 9.27 | 0.3208                | 1.51                  | 0.28 | 8.19 | 0.7274                |
| ATP2B4    | rs4951074   | G/A                                | 1   | 0.32            | 3934                              | All    | CM                | 0.30         | 1229                            | R  | 0.73       | 0.58 | 0.93 | 0.0092                | 0.97                  | 0.60 | 1.55 | 0.0084671             |
| ATP2B4    | rs55868763  | G/C                                | 1   | 0.33            | 3931                              | All    | CM                | 0.30         | 1227                            | R  | 0.68       | 0.54 | 0.87 | 0.0011                | 0.67                  | 0.52 | 0.86 | 0.0009                |
| CR1       | rs17047660  | A/G                                | 1   | 0.16            | 3923                              | All    | CM                | 0.18         | 1221                            | A  | 1.14       | 1.01 | 1.29 | 0.0397                | 1.11                  | 0.98 | 1.26 | 0.058625              |
| CR1       | rs17047661  | G/A                                | 1   | 0.32            | 3934                              | All    | CM                | 0.34         | 1217                            | A  | 1.10       | 1.00 | 1.21 | 0.0614                | 1.12                  | 1.01 | 1.24 | 0.0732                |
| DARC      | rs2814778   | G/A                                | 1   | 0.00            | 3944                              | All    | CM                | 0.00         | 1093                            | H  | 0.80       | 0.26 | 2.49 | 0.6942                | 0.74                  | 0.24 | 2.34 | 0.69406               |
| GBP7      | rs1803632   | G/C                                | 1   | 0.49            | 3942                              | All    | CM                | 0.51         | 1223                            | A  | 1.07       | 0.98 | 1.17 | 0.1484                | 1.08                  | 0.98 | 1.18 | 0.1564                |
| IL10      | rs1800890   | A/T                                | 1   | 0.24            | 3945                              | All    | CM                | 0.23         | 1225                            | R  | 0.74       | 0.55 | 0.99 | 0.0387                | 0.76                  | 0.55 | 0.99 | 0.040069              |
| IL10      | rs1800896   | T/C                                | 1   | 0.38            | 3943                              | All    | CM                | 0.36         | 1221                            | R  | 0.87       | 0.72 | 1.06 | 0.1673                | 0.87                  | 0.71 | 1.06 | 0.1683                |
| IL10      | rs3024500   | G/A                                | 1   | 0.45            | 3928                              | All    | CM                | 0.49         | 1222                            | R  | 1.26       | 1.08 | 1.47 | 0.0041                | 1.24                  | 1.06 | 1.46 | 0.0083114             |
| LPHN2     | rs146428334 | A/G                                | 1   | 0.00            | 3930                              | All    | CM                | 0.01         | 1230                            | H  | 1.51       | 0.80 | 2.86 | 0.2188                | 1.51                  | 0.79 | 2.90 | 0.2102                |
| LPHN2     | rs4650365   | T/C                                | 1   | 0.20            | 3936                              | All    | CM                | 0.19         | 1227                            | H  | 0.83       | 0.72 | 0.96 | 0.0091                | 0.84                  | 0.72 | 0.97 | 0.0064098             |
| LPHN2     | rs72933304  | C/A                                | 1   | 0.09            | 3942                              | All    | CM                | 0.07         | 1230                            | A  | 0.82       | 0.69 | 0.98 | 0.0279                | 0.86                  | 0.71 | 0.99 | 0.0371                |
| LPHN2     | rs72933310  | T/C                                | 1   | 0.09            | 3927                              | All    | CM                | 0.08         | 1229                            | D  | 0.86       | 0.72 | 1.03 | 0.1014                | 0.90                  | 0.75 | 1.08 | 0.10928               |
| LPHN2     | rs72933350  | T/C                                | 1   | 0.05            | 3940                              | All    | CM                | 0.04         | 1229                            | D  | 0.76       | 0.60 | 0.96 | 0.0203                | 0.82                  | 0.64 | 1.05 | 0.0245                |
| IL1A      | rs17561     | G/T                                | 2   | 0.16            | 3938                              | All    | CM                | 0.18         | 1224                            | R  | 1.40       | 0.96 | 2.04 | 0.0860                | 1.43                  | 0.97 | 2.11 | 0.084987              |
| IL1B      | rs1143634   | C/T                                | 2   | 0.11            | 3941                              | All    | CM                | 0.12         | 1221                            | H  | 1.07       | 0.91 | 1.25 | 0.4032                | 1.06                  | 0.90 | 1.25 | 0.4466                |
| LAPTM4A   | rs973128    | C/G                                | 2   | 0.44            | 3885                              | All    | CM                | 0.45         | 1214                            | D  | 1.08       | 0.93 | 1.24 | 0.3029                | 1.02                  | 0.88 | 1.18 | 0.28849               |
| LOC727982 | rs10188961  | A/G                                | 2   | 0.40            | 3934                              | All    | CM                | 0.41         | 1225                            | D  | 1.14       | 1.00 | 1.31 | 0.0551                | 1.17                  | 1.01 | 1.35 | 0.0526                |
| LOC727982 | rs1371474   | T/C                                | 2   | 0.27            | 3933                              | All    | CM                | 0.29         | 1230                            | H  | 1.32       | 1.16 | 1.50 | 4.21×10 <sup>-5</sup> | 1.37                  | 1.20 | 1.58 | 5.97×10 <sup>-5</sup> |
| LOC727982 | rs1371478   | C/T                                | 2   | 0.27            | 3909                              | All    | CM                | 0.29         | 1226                            | H  | 1.31       | 1.15 | 1.50 | 4.61×10 <sup>-5</sup> | 1.37                  | 1.19 | 1.57 | 7.19×10 <sup>-5</sup> |
| SDC1      | rs11899121  | C/G                                | 2   | 0.47            | 3921                              | All    | CM                | 0.48         | 1227                            | H  | 1.08       | 0.95 | 1.23 | 0.2659                | 1.06                  | 0.93 | 1.21 | 0.22618               |
| ZSWIM2    | rs144778284 | C/T                                | 2   | 0.00            | 3937                              | All    | CM                | 0.00         | 1229                            | R  | -          | -    | -    | -                     | -                     | -    | -    | -                     |
| ZSWIM2    | rs4316902   | A/G                                | 2   | 0.18            | 3910                              | All    | CM                | 0.17         | 1225                            | R  | 0.71       | 0.47 | 1.08 | 0.0984                | 0.76                  | 0.50 | 1.17 | 0.10588               |
| ARL14     | rs74954675  | A/C                                | 3   | 0.08            | 3907                              | All    | CM                | 0.09         | 1219                            | H  | 1.23       | 1.03 | 1.46 | 0.0227                | 1.24                  | 1.03 | 1.49 | 0.0167                |
| ARL14     | rs75731597  | A/C                                | 3   | 0.08            | 3491                              | All    | CM                | 0.10         | 1206                            | H  | 1.25       | 1.05 | 1.49 | 0.0123                | 1.25                  | 1.04 | 1.51 | 0.010905              |
| ARL14     | rs76033371  | A/G                                | 3   | 0.09            | 3939                              | All    | CM                | 0.10         | 1222                            | H  | 1.18       | 1.00 | 1.40 | 0.0529                | 1.19                  | 1.00 | 1.42 | 0.0452                |
| B3GALNT1  | rs12107243  | G/C                                | 3   | 0.49            | 3934                              | All    | CM                | 0.48         | 1227                            | D  | 0.91       | 0.79 | 1.06 | 0.2386                | 0.93                  | 0.80 | 1.09 | 0.23785               |
| IL17RD    | rs6780995   | A/G                                | 3   | 0.41            | 3939                              | All    | CM                | 0.39         | 1223                            | A  | 0.92       | 0.84 | 1.01 | 0.0763                | 0.93                  | 0.84 | 1.02 | 0.0880                |
| IL17RE    | rs708567    | A/G                                | 3   | 0.50            | 3881                              | All    | CM                | 0.49         | 1220                            | A  | 0.98       | 0.90 | 1.08 | 0.6937                | 0.95                  | 0.81 | 1.10 | 0.65809               |
| TLR9      | rs187084    | T/C                                | 3   | 0.33            | 3933                              | All    | CM                | 0.32         | 1095                            | A  | 0.92       | 0.83 | 1.02 | 0.0973                | 0.89                  | 0.80 | 0.99 | 0.0894                |
| FREM3     | rs149914432 | A/C                                | 4   | 0.10            | 3915                              | All    | CM                | 0.06         | 1221                            | A  | 0.60       | 0.50 | 0.73 | 2.12×10 <sup>-8</sup> | 0.64                  | 0.50 | 0.81 | 3.08×10 <sup>-8</sup> |
| FREM3     | rs184895969 | C/T                                | 4   | 0.00            | 3940                              | All    | CM                | 0.00         | 1230                            | H  | 0.73       | 0.33 | 1.60 | 0.4133                | 0.82                  | 0.35 | 1.95 | 0.4217                |
| FREM3     | rs184908374 | G/A                                | 4   | 0.00            | 3943                              | All    | CM                | 0.00         | 1230                            | H  | 0.90       | 0.40 | 2.01 | 0.7950                | 1.02                  | 0.42 | 2.46 | 0.80742               |
| FREM3     | rs186790584 | A/T                                | 4   | 0.10            | 3941                              | All    | CM                | 0.06         | 1229                            | A  | 0.60       | 0.50 | 0.72 | 1.44×10 <sup>-8</sup> | 0.61                  | 0.50 | 0.8  | 2.38×10 <sup>-8</sup> |
| FREM3     | rs186873296 | A/G                                | 4   | 0.10            | 3926                              | All    | CM                | 0.06         | 1225                            | A  | 0.59       | 0.49 | 0.71 | 7.16×10 <sup>-9</sup> | 0.63                  | 0.49 | 0.79 | 1.12×10 <sup>-8</sup> |
| GAB1      | rs7663712   | A/G                                | 4   | 0.02            | 3938                              | All    | CM                | 0.03         | 1229                            | A  | 1.18       | 0.89 | 1.57 | 0.2524                | 1.15                  | 0.85 | 1.54 | 0.2709                |
| INPP4B    | rs13103597  | C/T                                | 4   | 0.27            | 3925                              | All    | CM                | 0.23         | 1229                            | A  | 0.81       | 0.73 | 0.91 | 0.0002                | 0.88                  | 0.78 | 0.98 | 0.00031243            |
| INPP4B    | rs77389579  | G/T                                | 4   | 0.07            | 3937                              | All    | CM                | 0.05         | 1223                            | A  | 0.63       | 0.51 | 0.78 | 1.48×10 <sup>-5</sup> | 0.66                  | 0.52 | 0.83 | 1.64×10 <sup>-5</sup> |
| TLR1      | rs4833095   | C/T                                | 4   | 0.09            | 3921                              | All    | CM                | 0.10         | 1095                            | R  | 1.39       | 0.72 | 2.70 | 0.3349                | 1.35                  | 0.69 | 2.67 | 0.33249               |
| TLR6      | rs5743809   | T/C                                | 4   | 0.06            | 3884                              | All    | CM                | 0.06         | 1045                            | H  | 1.07       | 0.86 | 1.33 | 0.5686                | 0.73                  | 0.20 | 2.60 | 0.6295                |
| TLR6      | rs5743810   | C/T                                | 4   | 0.02            | 3936                              | All    | CM                | 0.01         | 1098                            | A  | 0.71       | 0.46 | 1.09 | 0.1017                | 0.62                  | 0.39 | 0.97 | 0.10323               |
| USP38     | rs28459062  | T/C                                | 4   | 0.16            | 3931                              | All    | CM                | 0.18         | 1230                            | A  | 1.16       | 1.03 | 1.31 | 0.0130                | 1.15                  | 1.02 | 1.31 | 0.0169                |
| USP38     | rs4266246   | C/T                                | 4   | 0.22            | 3928                              | All    | CM                | 0.22         | 1228                            | H  | 1.08       | 0.94 | 1.24 | 0.2589                | 1.03                  | 0.89 | 1.19 | 0.23556               |
| C6        | rs1801033   | A/C                                | 5   | 0.47            | 3927                              | All    | CM                | 0.48         | 1093                            | D  | 1.07       | 0.92 | 1.24 | 0.3939                | 1.06                  | 0.91 | 1.24 | 0.3683                |
| IL13      | rs20541     | C/T                                | 5   | 0.22            | 3796                              | All    | CM                | 0.21         | 1052                            | R  | 0.77       | 0.55 | 1.08 | 0.1217                | 0.75                  | 0.53 | 1.06 | 0.14752               |
| IRF       | rs2706384   | C/A                                | 5   | 0.38            | 3819                              | All    | CM                | 0.35         | 1072                            | D  | 0.90       | 0.78 | 1.04 | 0.1448                | 0.90                  | 0.78 | 1.04 | 0.1709                |
| CTLA      | rs2242665   | A/G                                | 6   | 0.26            | 3853                              | All    | CM                | 0.26         | 1077                            | H  | 1.02       | 0.89 | 1.18 | 0.7356                | 0.92                  | 0.69 | 1.22 | 0.7311                |
| GABBR1    | rs192151845 | G/A                                | 6   | 0.01            | 3943                              | All    | CM                | 0.01         | 1226                            | H  | 1.25       | 0.76 | 2.08 | 0.3858                | 1.31                  | 0.78 | 2.19 | 0.3749                |
| HCG4      | rs114980857 | C/T                                | 6   | 0.21            | 3843                              | All    | CM                | 0.22         | 1222                            | D  | 1.06       | 0.93 | 1.21 | 0.4043                | 1.04                  | 0.91 | 1.20 | 0.40318               |
| HSPA1B    | rs6457452   | C/T                                | 6   | 0.19            | 3917                              | All    | CM                | 0.18         | 1211                            | H  | 0.90       | 0.78 | 1.04 | 0.1480                | 0.92                  | 0.79 | 1.06 | 0.1841                |
| IL20RA    | rs1555498   | C/T                                | 6   | 0.46            | 3947                              | All    | CM                | 0.48         | 1222                            | R  | 1.03       | 0.88 | 1.20 | 0.7074                | 1.03                  | 0.87 | 1.20 | 0.74783               |
| LTA       | rs2239704   | G/T                                | 6   | 0.12            | 3896                              | All    | CM                | 0.13         | 1206                            | R  | 1.36       | 0.82 | 2.24 | 0.2373                | 1.58                  | 0.94 | 2.67 | 0.2342                |
| LTA       | rs909253    | T/C                                | 6   | 0.49            | 3921                              | All    | CM                | 0.49         | 1219                            | H  | 1.04       | 0.91 | 1.18 | 0.5970                | 1.06                  | 0.93 | 1.22 | 0.5589                |
| PLEKHG1   | rs114726617 | G/A                                | 6   | 0.04            | 3940                              | All    | CM                | 0.04         | 1230                            | A  | 1.20       | 0.95 | 1.50 | 0.1254                | 1.26                  | 0.99 | 1.60 | 0.1354                |
| PLEKHG1   | rs141555199 | C/G                                | 6   | 0.02            | 3943                              | All    | CM                | 0.02         | 1230                            | R  | -          | -    | -    | -                     | -                     | -    | -    | -                     |
| PLEKHG1   | rs142712208 | G/A                                | 6   | 0.03            | 3927                              | All    | CM                | 0.04         | 1231                            | D  | 1.21       | 0.94 | 1.57 | 0.1408                | 1.29                  | 1.00 | 1.68 | 0.1658                |
| PLEKHG1   | rs15116938  | C/T                                | 6   | 0.03            | 3939                              | All    | CM                | 0.04         | 1230                            | A  | 1.15       | 0.90 | 1.46 | 0.2823                | 1.23                  | 0.95 | 1.59 | 0.32486               |
| PLEKHG1   | rs151293197 | C/G                                | 6   | 0.03            | 3940                              | All    | CM                | 0.04         | 1230                            | A  | 1.16       | 0.90 | 1.48 | 0.2509                | 1.24                  | 0.95 | 1.60 | 0.2907                |
| PLEKHG1   | rs2131263   | C/T                                | 6   | 0.04            | 3938                              | All    | CM                | 0.04         | 1230                            | A  | 1.20       | 0.95 | 1.50 | 0.1261                | 1.26                  | 0.99 | 1.60 | 0.13612               |
| PLEKHG1   | rs55958968  | A/G                                | 6   | 0.05            | 3932                              | All    | CM                | 0.06         | 1230                            | H  | 1.17       | 0.94 | 1.46 | 0.1558                | 1.12                  | 0.90 | 1.38 | 0.2841                |
| PLEKHG1   | rs76924464  | G/A                                | 6   | 0.03            | 3940                              | All    | CM                | 0.04         | 1230                            | A  | 1.17       | 0.92 | 1.49 | 0.2128                | 1.25                  | 0.97 | 1.62 | 0.24749               |
| PLEKHG1   | rs79100774  | G/C                                | 6   | 0.03            | 3939                              | All    | CM                | 0.04         | 1230                            | A  | 1.17       | 0.92 | 1.49 | 0.2121                | 1.25                  | 0.97 | 1.62 | 0.2448                |
| SNORD48   | rs116288147 | C/T                                | 6   | 0.24            | 3896                              | All    | CM                | 0.24         | 1210                            | R  | 1.13       | 0.87 | 1.48 | 0.3661                | 1.15                  | 0.86 | 1.53 | 0.49978               |
| TNF       | rs1799964   | T/C                                | 6   | 0.27            | 3938                              | All    | CM                | 0.28         | 1210                            | R  | 1.07       | 0.84 | 1.36 | 0.5924                | 1.09                  | 0.85 | 1.41 | 0.5856                |
| TNF       | rs1800629   | G/A                                | 6   | 0.09            | 3940                              | All    | CM                | 0.09         | 1225                            | D  | 0.97       | 0.82 | 1.15 | 0.7156                | 0.97                  | 0.82 | 1.16 | 0.76027               |
| TNF       | rs1800750   | G/A                                | 6   | 0.05            | 3868                              | All    | CM                | 0.05         | 737                             | D  | 0.89       | 0.68 | 1.17 | 0.3967                | 0.90                  | 0.68 | 1.19 | 0.3455                |
| TNF       | rs3093662   | A/G                                | 6   | 0.11            | 3936                              | All    | CM                | 0.12         | 1219                            | R  | 0.70       | 0.37 | 1.32 | 0.2524                | 0.69                  | 0.36 | 1.31 | 0.25352               |
| TNF       | rs361525    | G/A                                |     |                 |                                   |        |                   |              |                                 |    |            |      |      |                       |                       |      |      |                       |

|                |                                 |     |    |      |      |     |    |      |      |    |      |      |       |                        |      |      |        |                        |
|----------------|---------------------------------|-----|----|------|------|-----|----|------|------|----|------|------|-------|------------------------|------|------|--------|------------------------|
| <i>MKI67</i>   | rs148494166                     | T/C | 10 | 0.00 | 3913 | All | CM | 0.00 | 1193 | H  | 1.89 | 0.82 | 4.37  | 0.1512                 | 1.59 | 0.67 | 3.74   | 0.14647                |
| <i>HBB</i>     | rs334                           | A/T | 11 | 0.08 | 3949 | All | CM | 0.02 | 1222 | H  | 0.14 | 0.09 | 0.21  | 8.64×10 <sup>-39</sup> | 0.14 | 0.09 | 0.21   | 1.67×10 <sup>-38</sup> |
| <i>RRM1</i>    | rs116472045                     | A/G | 11 | 0.02 | 3939 | All | CM | 0.01 | 1227 | A  | 0.66 | 0.43 | 1.03  | 0.0559                 | 0.60 | 0.38 | 0.96   | 0.046517               |
| <i>RTN3</i>    | rs542998                        | T/C | 11 | 0.43 | 3929 | All | CM | 0.42 | 1085 | A  | 0.96 | 0.87 | 1.06  | 0.4499                 | 0.99 | 0.82 | 1.19   | 0.4858                 |
| <i>TRIM5</i>   | rs7935564                       | G/A | 11 | 0.44 | 3871 | All | CM | 0.45 | 1093 | R  | 1.12 | 0.94 | 1.33  | 0.2020                 | 1.00 | 0.84 | 1.19   | 0.19199                |
| <i>CAND1</i>   | rs10459266                      | C/A | 12 | 0.21 | 3938 | All | CM | 0.21 | 1229 | A  | 1.05 | 0.94 | 1.18  | 0.3494                 | 1.04 | 0.92 | 1.16   | 0.3012                 |
| <i>CAND1</i>   | rs12307123                      | C/T | 12 | 0.23 | 3933 | All | CM | 0.24 | 1230 | D  | 1.16 | 1.02 | 1.33  | 0.0242                 | 1.17 | 1.02 | 1.34   | 0.016717               |
| <i>CAND1</i>   | rs1566830                       | G/T | 12 | 0.26 | 3940 | All | CM | 0.28 | 1229 | A  | 1.13 | 1.02 | 1.26  | 0.0174                 | 1.12 | 1.01 | 1.25   | 0.0132                 |
| <i>GRIP1</i>   | rs1394263                       | T/C | 12 | 0.26 | 3914 | All | CM | 0.28 | 1226 | A  | 1.14 | 1.03 | 1.27  | 0.0116                 | 1.13 | 1.02 | 1.26   | 0.0086331              |
| <i>IL22</i>    | rs1012356                       | A/T | 12 | 0.49 | 3940 | All | CM | 0.48 | 1219 | R  | 0.94 | 0.80 | 1.10  | 0.4187                 | 0.96 | 0.82 | 1.13   | 0.4263                 |
| <i>IL22</i>    | rs2227478                       | A/G | 12 | 0.38 | 3939 | All | CM | 0.38 | 1224 | R  | 0.91 | 0.76 | 1.09  | 0.3045                 | 0.88 | 0.73 | 1.07   | 0.3128                 |
| <i>IL22</i>    | rs2227485                       | G/A | 12 | 0.42 | 3928 | All | CM | 0.41 | 1219 | R  | 0.92 | 0.78 | 1.10  | 0.3618                 | 0.89 | 0.74 | 1.07   | 0.3404                 |
| <i>IL22</i>    | rs2227491                       | C/T | 12 | 0.40 | 3870 | All | CM | 0.42 | 1200 | A  | 1.06 | 0.96 | 1.16  | 0.2375                 | 1.04 | 0.94 | 1.15   | 0.23557                |
| <i>IL22</i>    | rs2227507                       | T/C | 12 | 0.04 | 3948 | All | CM | 0.04 | 1226 | H  | 0.96 | 0.76 | 1.22  | 0.7470                 | 0.97 | 0.76 | 1.24   | 0.7489                 |
| <i>TPTE2</i>   | rs182873742                     | C/G | 13 | 0.00 | 3940 | All | CM | 0.00 | 1222 | H  | 3.67 | 0.22 | 61.54 | 0.3809                 | 4.16 | 0.15 | 116.27 | 0.37748                |
| <i>RPS6KLI</i> | rs3742785                       | C/A | 14 | 0.29 | 3714 | All | CM | 0.29 | 1170 | H  | 1.18 | 1.03 | 1.35  | 0.0143                 | 1.19 | 1.03 | 1.37   | 0.0141                 |
| <i>SPTB</i>    | rs229587                        | T/C | 14 | 0.34 | 3872 | All | CM | 0.34 | 1192 | R  | 0.91 | 0.74 | 1.12  | 0.3571                 | 0.91 | 0.73 | 1.13   | 0.40718                |
| <i>YLP1</i>    | rs10139016                      | C/T | 14 | 0.25 | 3937 | All | CM | 0.27 | 1228 | D  | 1.11 | 0.98 | 1.27  | 0.1059                 | 1.10 | 0.96 | 1.26   | 0.1063                 |
| <i>ADCY9</i>   | rs10775349                      | C/G | 16 | 0.20 | 3941 | All | CM | 0.20 | 1097 | H  | 1.05 | 0.91 | 1.22  | 0.4706                 | 1.08 | 0.93 | 1.25   | 0.4308                 |
| <i>ADCY9</i>   | rs2230739                       | A/G | 16 | 0.09 | 3944 | All | CM | 0.07 | 1098 | A  | 0.84 | 0.70 | 1.00  | 0.0503                 | 0.83 | 0.69 | 1.00   | 0.0479                 |
| <i>HBA</i>     | α <sup>-3.7</sup> -thalassaemia | I/D | 16 | 0.41 | 3946 | All | CM | 0.37 | 1189 | A  | 0.83 | 0.75 | 0.91  | 0.0001                 | 0.83 | 0.76 | 0.90   | 0.0001                 |
| <i>ILA</i>     | rs2243250                       | T/C | 16 | 0.20 | 3902 | All | CM | 0.22 | 1212 | D  | 1.13 | 0.98 | 1.29  | 0.0855                 | 1.11 | 0.96 | 1.28   | 0.0858                 |
| <i>ILAR</i>    | rs1805015                       | T/C | 16 | 0.42 | 3927 | All | CM | 0.44 | 1223 | D  | 1.12 | 0.98 | 1.29  | 0.1027                 | 1.15 | 0.99 | 1.33   | 0.093058               |
| <i>ADORA2B</i> | rs2535611                       | T/C | 17 | 0.10 | 3911 | All | CM | 0.12 | 1094 | D  | 1.10 | 0.93 | 1.30  | 0.2651                 | 1.09 | 0.92 | 1.29   | 0.2820                 |
| <i>NOS2</i>    | rs1800482                       | G/C | 17 | 0.08 | 3922 | All | CM | 0.07 | 1218 | H  | 0.94 | 0.78 | 1.14  | 0.5488                 | 0.94 | 0.78 | 1.13   | 0.50249                |
| <i>NOS2</i>    | rs2297518                       | G/A | 17 | 0.14 | 3910 | All | CM | 0.13 | 1091 | A  | 0.92 | 0.80 | 1.06  | 0.2360                 | 0.93 | 0.80 | 1.08   | 0.2342                 |
| <i>NOS2</i>    | rs8078340                       | C/T | 17 | 0.21 | 3948 | All | CM | 0.20 | 1225 | R  | 0.66 | 0.45 | 0.97  | 0.0275                 | 0.64 | 0.43 | 0.94   | 0.028385               |
| <i>NOS2</i>    | rs9282799                       | C/T | 17 | 0.03 | 3949 | All | CM | 0.03 | 1220 | H  | 1.29 | 0.98 | 1.69  | 0.0735                 | 1.27 | 0.95 | 1.70   | 0.0796                 |
| <i>TBX2</i>    | rs73991577                      | A/G | 17 | 0.00 | 3937 | All | CM | 0.00 | 1230 | H  | 0.57 | 0.19 | 1.70  | 0.2890                 | 0.60 | 0.20 | 1.80   | 0.2945                 |
| <i>EMR1</i>    | rs373533                        | G/T | 19 | 0.46 | 3863 | All | CM | 0.49 | 1091 | D  | 1.14 | 0.98 | 1.33  | 0.0908                 | 1.12 | 0.95 | 1.32   | 0.1102                 |
| <i>EMR1</i>    | rs461645                        | C/T | 19 | 0.47 | 3933 | All | CM | 0.49 | 1097 | D  | 1.14 | 0.98 | 1.33  | 0.0924                 | 1.12 | 0.95 | 1.31   | 0.11209                |
| <i>ICAM</i>    | rs5498                          | A/G | 19 | 0.11 | 3908 | All | CM | 0.13 | 1204 | H  | 1.08 | 0.92 | 1.26  | 0.3494                 | 1.05 | 0.89 | 1.24   | 0.3330                 |
| <i>GNAS</i>    | rs8386                          | C/T | 20 | 0.19 | 3944 | All | CM | 0.19 | 1223 | R  | 1.46 | 1.05 | 2.03  | 0.0299                 | 1.42 | 1.01 | 1.99   | 0.029177               |
| <i>DERL3</i>   | rs1128127                       | G/A | 22 | 0.50 | 3911 | All | CM | 0.47 | 1221 | R  | 0.92 | 0.79 | 1.08  | 0.3098                 | 0.91 | 0.77 | 1.07   | 0.3245                 |
| <i>CD40LG</i>  | rs1126535                       | T/C | X  | 0.15 | 3934 | M+F | CM | 0.17 | 1223 | R  | 1.23 | 0.99 | 1.54  | 0.0649                 | 1.20 | 0.95 | 1.51   | 0.089102               |
| <i>CD40LG</i>  | rs1126535                       | T/C | X  | 0.16 | 1947 | F   | CM | 0.15 | 601  | D  | 0.94 | 0.76 | 1.15  | 0.5486                 | 0.95 | 0.77 | 1.16   | 0.5686                 |
| <i>CD40LG</i>  | rs1126535                       | C/T | X  | 0.85 | 1987 | M   | CM | 0.81 | 622  | HM | 0.77 | 0.61 | 0.98  | 0.0348                 | 0.79 | 0.62 | 0.99   | 0.044779               |
| <i>CD40LG</i>  | rs3092945                       | T/C | X  | 0.21 | 3927 | M+F | CM | 0.25 | 1223 | R  | 1.32 | 1.10 | 1.59  | 0.0034                 | 1.38 | 1.14 | 1.67   | 0.0037                 |
| <i>CD40LG</i>  | rs3092945                       | T/C | X  | 0.21 | 1942 | F   | CM | 0.25 | 602  | R  | 1.89 | 1.30 | 2.76  | 0.0012                 | 1.23 | 1.05 | 1.43   | 0.007                  |
| <i>CD40LG</i>  | rs3092945                       | C/T | X  | 0.78 | 1985 | M   | CM | 0.74 | 621  | HM | 0.84 | 0.68 | 1.04  | 0.1097                 | 0.81 | 0.66 | 1.00   | 0.0500                 |
| <i>G6PD</i>    | rs1050828                       | C/T | X  | 0.19 | 3940 | M+F | CM | 0.18 | 1220 | H  | 0.82 | 0.70 | 0.97  | 0.0100                 | 0.80 | 0.68 | 0.96   | 0.0108                 |
| <i>G6PD</i>    | rs1050828                       | C/T | X  | 0.20 | 1951 | F   | CM | 0.18 | 600  | H  | 0.80 | 0.65 | 0.98  | 0.0202                 | 0.79 | 0.64 | 0.97   | 0.0200                 |
| <i>G6PD</i>    | rs1050828                       | C/T | X  | 0.19 | 1989 | M   | CM | 0.18 | 620  | HM | 0.92 | 0.72 | 1.17  | 0.4891                 | 0.91 | 0.72 | 1.15   | 0.45                   |
| <i>G6PD</i>    | rs1050829                       | T/C | X  | 0.40 | 3928 | M+F | CM | 0.41 | 1221 | H  | 0.84 | 0.70 | 1.01  | 0.0609                 | 0.87 | 0.71 | 1.06   | 0.0658                 |
| <i>G6PD</i>    | rs1050829                       | T/C | X  | 0.41 | 1952 | F   | CM | 0.41 | 601  | H  | 0.84 | 0.70 | 1.01  | 0.0631                 | 0.85 | 0.72 | 1.10   | 0.083127               |
| <i>G6PD</i>    | rs1050829                       | C/T | X  | 0.60 | 1976 | M   | CM | 0.58 | 620  | HM | 0.94 | 0.78 | 1.14  | 0.5353                 | 0.95 | 0.79 | 1.17   | 0.5353                 |

\* The rs8176719 polymorphism identifies blood-group O in the homozygous deletion form. The derived allele of rs8176746 identifies blood-group B. Chr = chromosome; DAF = derived allele frequency; MO = genotype model [A – additive, D – dominant, H – heterozygote, HM – hemizygous males, R – recessive] with respect to the derived allele; OR = Odds Ratio; LCI = Lower Confidence Interval (95%); UCI = Upper Confidence Interval; P = p-value using a logistic regression model as described in methods. § ORs and p-values unadjusted and adjusted for ethnic group, gender and rs334 genotype. All individuals having cerebral malaria were included in this analysis even if they were identified with multiple severe phenotypes.

**Table S4: Odds ratios for all-CM for all polymorphisms investigated.**

| Gene      | SNPID       | Alleles<br>(ancestral<br>/ derived) | Chr | DAF<br>Controls | No. of<br>genotype<br>in controls | Sample | Case<br>Phenotype | DAF<br>Cases | No. of<br>genotypes<br>in cases | MO | Unadjusted |      |       |                       | Adjusted <sup>§</sup> |      |       |                       |
|-----------|-------------|-------------------------------------|-----|-----------------|-----------------------------------|--------|-------------------|--------------|---------------------------------|----|------------|------|-------|-----------------------|-----------------------|------|-------|-----------------------|
|           |             |                                     |     |                 |                                   |        |                   |              |                                 |    | OR         | LCL  | UCL   | P                     | OR                    | LCL  | UCL   | P                     |
| AJAP1     | rs113788643 | A/G                                 | 1   | 0.08            | 3940                              | All    | SMA               | 0.07         | 666                             | H  | 0.85       | 0.66 | 1.10  | 0.2075                | 0.82                  | 0.63 | 1.07  | 0.2054                |
| AJAP1     | rs6674631   | G/A                                 | 1   | 0.13            | 3928                              | All    | SMA               | 0.11         | 667                             | A  | 0.84       | 0.70 | 1.00  | 0.0502                | 0.82                  | 0.67 | 0.99  | 0.045017              |
| ATP2B4    | rs10900585  | G/T                                 | 1   | 0.34            | 3762                              | All    | SMA               | 0.31         | 659                             | R  | 1.52       | 1.11 | 2.09  | 0.0034                | 1.00                  | 0.54 | 1.85  | 0.0040                |
| ATP2B4    | rs1541255   | A/G                                 | 1   | 0.33            | 3933                              | All    | SMA               | 0.29         | 665                             | R  | 0.63       | 0.46 | 0.87  | 0.0030                | 0.61                  | 0.43 | 0.84  | 0.003432              |
| ATP2B4    | rs3753036   | G/A                                 | 1   | 0.04            | 3939                              | All    | SMA               | 0.05         | 667                             | D  | 1.21       | 0.91 | 1.60  | 0.1976                | 1.19                  | 0.88 | 1.61  | 0.2236                |
| ATP2B4    | rs4951074   | G/A                                 | 1   | 0.32            | 3934                              | All    | SMA               | 0.29         | 666                             | R  | 0.66       | 0.48 | 0.91  | 0.0087                | 0.67                  | 0.53 | 0.92  | 0.009973              |
| ATP2B4    | rs55868763  | G/C                                 | 1   | 0.33            | 3931                              | All    | SMA               | 0.29         | 661                             | R  | 0.62       | 0.45 | 0.85  | 0.0019                | 0.64                  | 0.48 | 0.89  | 0.0021                |
| CR1       | rs17047660  | A/G                                 | 1   | 0.16            | 3923                              | All    | SMA               | 0.15         | 683                             | H  | 0.87       | 0.72 | 1.05  | 0.1335                | 0.85                  | 0.69 | 1.03  | 0.096844              |
| CR1       | rs17047661  | G/A                                 | 1   | 0.32            | 3934                              | All    | SMA               | 0.33         | 685                             | A  | 1.06       | 0.93 | 1.20  | 0.3728                | 1.06                  | 0.93 | 1.21  | 0.3946                |
| DARC      | rs2814778   | G/A                                 | 1   | 0.00            | 3944                              | All    | SMA               | 0.00         | 556                             | H  | 0.76       | 0.17 | 3.41  | 0.7084                | 0.74                  | 0.16 | 3.35  | 0.71045               |
| GBP7      | rs1803632   | G/C                                 | 1   | 0.49            | 3942                              | All    | SMA               | 0.50         | 685                             | R  | 1.10       | 0.91 | 1.33  | 0.3224                | 1.10                  | 0.90 | 1.34  | 0.4239                |
| IL10      | rs1800890   | A/T                                 | 1   | 0.24            | 3945                              | All    | SMA               | 0.24         | 687                             | R  | 0.83       | 0.58 | 1.19  | 0.3086                | 0.89                  | 0.62 | 1.30  | 0.3312                |
| IL10      | rs1800896   | T/C                                 | 1   | 0.38            | 3943                              | All    | SMA               | 0.38         | 682                             | R  | 1.05       | 0.84 | 1.33  | 0.6612                | 1.08                  | 0.84 | 1.37  | 0.5771                |
| IL10      | rs3024500   | G/A                                 | 1   | 0.45            | 3928                              | All    | SMA               | 0.47         | 682                             | H  | 0.80       | 0.68 | 0.95  | 0.0094                | 0.81                  | 0.68 | 0.97  | 0.012456              |
| LPHN2     | rs146428334 | A/G                                 | 1   | 0.00            | 3930                              | All    | SMA               | 0.00         | 668                             | H  | 0.60       | 0.18 | 1.99  | 0.3751                | 0.58                  | 0.17 | 1.93  | 0.3811                |
| LPHN2     | rs4650365   | T/C                                 | 1   | 0.20            | 3936                              | All    | SMA               | 0.18         | 667                             | D  | 0.85       | 0.71 | 1.01  | 0.0586                | 0.86                  | 0.72 | 1.04  | 0.056572              |
| LPHN2     | rs72933304  | C/A                                 | 1   | 0.09            | 3942                              | All    | SMA               | 0.07         | 666                             | A  | 0.85       | 0.68 | 1.06  | 0.1517                | 0.88                  | 0.70 | 1.11  | 0.1714                |
| LPHN2     | rs72933310  | T/C                                 | 1   | 0.09            | 3927                              | All    | SMA               | 0.08         | 664                             | A  | 0.90       | 0.73 | 1.12  | 0.3428                | 0.92                  | 0.74 | 1.14  | 0.33259               |
| LPHN2     | rs72933350  | T/C                                 | 1   | 0.05            | 3940                              | All    | SMA               | 0.04         | 667                             | D  | 0.72       | 0.52 | 0.98  | 0.0303                | 0.79                  | 0.57 | 1.10  | 0.0344                |
| IL1A      | rs17561     | G/T                                 | 2   | 0.16            | 3938                              | All    | SMA               | 0.17         | 687                             | R  | 1.05       | 0.63 | 1.76  | 0.8487                | 1.06                  | 0.61 | 1.83  | 0.82324               |
| IL1B      | rs1143634   | C/T                                 | 2   | 0.11            | 3941                              | All    | SMA               | 0.13         | 686                             | A  | 1.10       | 0.92 | 1.30  | 0.3102                | 1.06                  | 0.88 | 1.28  | 0.3764                |
| LAPTM4A   | rs973128    | C/G                                 | 2   | 0.44            | 3885                              | All    | SMA               | 0.46         | 658                             | A  | 1.11       | 0.98 | 1.25  | 0.0888                | 1.11                  | 0.98 | 1.26  | 0.079476              |
| LOC727982 | rs10188961  | A/G                                 | 2   | 0.40            | 3934                              | All    | SMA               | 0.45         | 665                             | D  | 1.44       | 1.20 | 1.72  | 0.0001                | 1.48                  | 1.22 | 1.80  | 0.00005               |
| LOC727982 | rs1371474   | T/C                                 | 2   | 0.27            | 3933                              | All    | SMA               | 0.30         | 667                             | H  | 1.32       | 1.11 | 1.55  | 0.0013                | 1.42                  | 1.19 | 1.69  | 0.001172              |
| LOC727982 | rs1371478   | C/T                                 | 2   | 0.27            | 3909                              | All    | SMA               | 0.30         | 663                             | D  | 1.31       | 1.11 | 1.55  | 0.0014                | 1.45                  | 1.22 | 1.74  | 0.0011                |
| SDCI      | rs11899121  | C/G                                 | 2   | 0.47            | 3921                              | All    | SMA               | 0.47         | 666                             | D  | 0.97       | 0.81 | 1.16  | 0.7102                | 1.01                  | 0.90 | 1.15  | 0.91039               |
| ZSWIM2    | rs144778284 | C/T                                 | 2   | 0.00            | 3937                              | All    | SMA               | 0.00         | 667                             | R  | -          | -    | -     | -                     | -                     | -    | -     | -                     |
| ZSWIM2    | rs4316902   | A/G                                 | 2   | 0.18            | 3910                              | All    | SMA               | 0.18         | 666                             | R  | 0.87       | 0.53 | 1.42  | 0.5709                | 0.88                  | 0.52 | 1.48  | 0.58979               |
| ARL14     | rs74954675  | A/C                                 | 3   | 0.08            | 3907                              | All    | SMA               | 0.10         | 662                             | H  | 1.31       | 1.05 | 1.62  | 0.0192                | 1.27                  | 1.00 | 1.60  | 0.0243                |
| ARL14     | rs75731597  | A/C                                 | 3   | 0.08            | 3491                              | All    | SMA               | 0.10         | 646                             | H  | 1.27       | 1.02 | 1.59  | 0.0353                | 1.30                  | 1.07 | 1.59  | 0.046063              |
| ARL14     | rs76033371  | A/G                                 | 3   | 0.09            | 3939                              | All    | SMA               | 0.11         | 661                             | H  | 1.26       | 1.02 | 1.56  | 0.0353                | 1.20                  | 0.95 | 1.50  | 0.0431                |
| B3GALNT1  | rs12107243  | G/C                                 | 3   | 0.49            | 3934                              | All    | SMA               | 0.49         | 667                             | D  | 1.02       | 0.84 | 1.23  | 0.8608                | 1.03                  | 0.91 | 1.17  | 0.92778               |
| ILI7RD    | rs6780995   | A/G                                 | 3   | 0.41            | 3939                              | All    | SMA               | 0.39         | 687                             | R  | 0.84       | 0.67 | 1.05  | 0.1222                | 0.87                  | 0.68 | 1.10  | 0.1597                |
| ILI7RE    | rs708567    | A/G                                 | 3   | 0.50            | 3881                              | All    | SMA               | 0.49         | 685                             | D  | 0.95       | 0.79 | 1.15  | 0.5998                | 0.94                  | 0.77 | 1.15  | 0.54384               |
| TLR9      | rs187084    | T/C                                 | 3   | 0.33            | 3933                              | All    | SMA               | 0.33         | 557                             | H  | 0.95       | 0.79 | 1.14  | 0.5787                | 0.95                  | 0.79 | 1.15  | 0.5583                |
| FREM3     | rs149914432 | A/C                                 | 4   | 0.10            | 3915                              | All    | SMA               | 0.06         | 663                             | A  | 0.58       | 0.45 | 0.74  | 2.26x10 <sup>-6</sup> | 0.68                  | 0.50 | 0.94  | 3.68x10 <sup>-6</sup> |
| FREM3     | rs184895969 | C/T                                 | 4   | 0.00            | 3940                              | All    | SMA               | 0.00         | 668                             | H  | 1.02       | 0.42 | 2.47  | 0.9662                | 1.26                  | 0.48 | 3.27  | 0.9530                |
| FREM3     | rs184908374 | G/A                                 | 4   | 0.00            | 3943                              | All    | SMA               | 0.00         | 666                             | H  | 1.25       | 0.51 | 3.07  | 0.6373                | 1.62                  | 0.61 | 4.31  | 0.62615               |
| FREM3     | rs186790584 | A/T                                 | 4   | 0.10            | 3941                              | All    | SMA               | 0.06         | 667                             | A  | 0.57       | 0.44 | 0.73  | 1.55x10 <sup>-6</sup> | 0.63                  | 0.48 | 0.8   | 2.72x10 <sup>-6</sup> |
| FREM3     | rs186873296 | A/G                                 | 4   | 0.10            | 3926                              | All    | SMA               | 0.05         | 663                             | A  | 0.55       | 0.43 | 0.70  | 4.56x10 <sup>-7</sup> | 0.67                  | 0.44 | 0.83  | 8.20x10 <sup>-7</sup> |
| GAB1      | rs7663712   | A/G                                 | 4   | 0.02            | 3938                              | All    | SMA               | 0.03         | 668                             | R  | -          | -    | -     | -                     | 1.25                  | 0.85 | 1.82  | 0.3793                |
| INPP4B    | rs13103597  | C/T                                 | 4   | 0.27            | 3925                              | All    | SMA               | 0.22         | 666                             | D  | 0.76       | 0.64 | 0.90  | 0.0013                | 0.75                  | 0.64 | 0.89  | 0.001257              |
| INPP4B    | rs77389579  | G/T                                 | 4   | 0.07            | 3937                              | All    | SMA               | 0.04         | 666                             | A  | 0.56       | 0.42 | 0.75  | 3.57x10 <sup>-5</sup> | 0.60                  | 0.43 | 0.82  | 5.35x10 <sup>-5</sup> |
| TLR1      | rs4833095   | C/T                                 | 4   | 0.09            | 3921                              | All    | SMA               | 0.08         | 558                             | H  | 0.79       | 0.60 | 1.03  | 0.0697                | 0.84                  | 0.66 | 1.07  | 0.44251               |
| TLR6      | rs5743809   | T/C                                 | 4   | 0.06            | 3884                              | All    | SMA               | 0.05         | 533                             | H  | 0.89       | 0.65 | 1.20  | 0.4320                | 0.89                  | 0.64 | 1.24  | 0.3248                |
| TLR6      | rs5743810   | C/T                                 | 4   | 0.02            | 3936                              | All    | SMA               | 0.01         | 558                             | A  | 0.78       | 0.44 | 1.37  | 0.3732                | 0.72                  | 0.40 | 1.28  | 0.37936               |
| USP38     | rs28459062  | T/C                                 | 4   | 0.16            | 3931                              | All    | SMA               | 0.17         | 666                             | A  | 1.07       | 0.92 | 1.25  | 0.3788                | 1.04                  | 0.88 | 1.22  | 0.4579                |
| USP38     | rs4266246   | C/T                                 | 4   | 0.22            | 3928                              | All    | SMA               | 0.23         | 667                             | R  | 1.23       | 0.86 | 1.77  | 0.2740                | 1.14                  | 0.78 | 1.66  | 0.25133               |
| C6        | rs1801033   | A/C                                 | 5   | 0.47            | 3927                              | All    | SMA               | 0.46         | 556                             | R  | 0.92       | 0.74 | 1.14  | 0.4372                | 0.89                  | 0.71 | 1.12  | 0.4362                |
| IL13      | rs20541     | C/T                                 | 5   | 0.22            | 3796                              | All    | SMA               | 0.22         | 535                             | R  | 0.63       | 0.38 | 1.03  | 0.0520                | 0.59                  | 0.35 | 1.00  | 0.062928              |
| IRF       | rs2706384   | C/A                                 | 5   | 0.38            | 3819                              | All    | SMA               | 0.37         | 546                             | H  | 1.25       | 1.04 | 1.49  | 0.0164                | 1.28                  | 1.06 | 1.55  | 0.0102                |
| CTLA      | rs2242665   | A/G                                 | 6   | 0.26            | 3853                              | All    | SMA               | 0.25         | 550                             | H  | 0.86       | 0.71 | 1.03  | 0.1016                | 0.81                  | 0.67 | 0.99  | 0.080986              |
| GABBR1    | rs192151845 | G/A                                 | 6   | 0.01            | 3943                              | All    | SMA               | 0.01         | 665                             | H  | 1.13       | 0.59 | 2.18  | 0.7198                | 1.15                  | 0.59 | 2.25  | 0.7063                |
| HCG4      | rs114980857 | C/T                                 | 6   | 0.21            | 3843                              | All    | SMA               | 0.21         | 654                             | R  | 0.87       | 0.57 | 1.31  | 0.4867                | 0.81                  | 0.52 | 1.26  | 0.50211               |
| HSPA1B    | rs6457452   | C/T                                 | 6   | 0.19            | 3917                              | All    | SMA               | 0.17         | 674                             | D  | 0.84       | 0.70 | 1.00  | 0.0478                | 0.81                  | 0.66 | 0.99  | 0.0443                |
| IL20RA    | rs1555498   | C/T                                 | 6   | 0.46            | 3947                              | All    | SMA               | 0.50         | 684                             | R  | 1.16       | 0.96 | 1.40  | 0.1235                | 1.17                  | 0.96 | 1.43  | 0.1376                |
| LTA       | rs2239704   | G/T                                 | 6   | 0.12            | 3896                              | All    | SMA               | 0.11         | 670                             | H  | 0.86       | 0.70 | 1.06  | 0.1431                | 0.81                  | 0.65 | 1.01  | 0.1256                |
| LTA       | rs909253    | T/C                                 | 6   | 0.49            | 3921                              | All    | SMA               | 0.50         | 680                             | D  | 1.10       | 0.91 | 1.33  | 0.3397                | 1.22                  | 0.99 | 1.49  | 0.25607               |
| PLEKHG1   | rs114726617 | G/A                                 | 6   | 0.04            | 3940                              | All    | SMA               | 0.04         | 668                             | R  | 2.32       | 0.60 | 8.93  | 0.2513                | 2.99                  | 0.74 | 12.04 | 0.2482                |
| PLEKHG1   | rs141555199 | C/G                                 | 6   | 0.02            | 3943                              | All    | SMA               | 0.02         | 667                             | R  | -          | -    | -     | -                     | -                     | -    | -     | -                     |
| PLEKHG1   | rs142712208 | G/A                                 | 6   | 0.03            | 3927                              | All    | SMA               | 0.04         | 667                             | R  | 3.51       | 0.87 | 14.27 | 0.1071                | 5.40                  | 1.28 | 22.73 | 0.1055                |
| PLEKHG1   | rs15116938  | C/T                                 | 6   | 0.03            | 3939                              | All    | SMA               | 0.04         | 668                             | R  | 4.83       | 1.34 | 17.36 | 0.0270                | 7.43                  | 1.99 | 27.71 | 0.026517              |
| PLEKHG1   | rs151293197 | C/G                                 | 6   | 0.03            | 3940                              | All    | SMA               | 0.04         | 667                             | R  | 3.52       | 0.87 | 14.30 | 0.1065                | 5.40                  | 1.28 | 22.76 | 0.1049                |
| PLEKHG1   | rs2131263   | C/T                                 | 6   | 0.04            | 3938                              | All    | SMA               | 0.04         | 668                             | R  | 2.32       | 0.60 | 8.92  | 0.2515                | 2.99                  | 0.74 | 12.04 | 0.24833               |
| PLEKHG1   | rs55958968  | A/G                                 | 6   | 0.05            | 3932                              | All    | SMA               | 0.06         | 668                             | H  | 1.21       | 0.93 | 1.58  | 0.1617                | 1.27                  | 0.96 | 1.67  | 0.1399                |
| PLEKHG1   | rs76924464  | G/A                                 | 6   | 0.03            | 3940                              | All    | SMA               | 0.04         | 668                             | R  | 3.51       | 0.87 | 14.26 | 0.1071                | 5.37                  | 1.28 | 22.62 | 0.10551               |
| PLEKHG1   | rs79100774  | G/C                                 | 6   | 0.03            | 3939                              | All    | SMA               | 0.04         | 665                             | R  | 3.53       | 0.87 | 14.32 | 0.1060                | 5.39                  | 1.28 | 22.72 | 0.1044                |
| SNORD48   | rs116288147 | C/T                                 | 6   | 0.24            | 3896                              | All    | SMA               | 0.22         | 658                             | D  | 0.89       | 0.75 | 1.06  | 0.1831                | 0.86                  | 0.72 | 1.03  | 0.17358               |
| TNF       | rs1799964   | T/C                                 | 6   | 0.27            | 3938                              | All    | SMA               | 0.28         | 674                             | R  | 1.10       | 0.81 | 1.49  | 0.5481                | 1.07                  | 0.78 | 1.48  | 0.5174                |
| TNF       | rs1800629   | G/A                                 | 6   | 0.09            | 3940                              | All    | SMA               | 0.10         | 685                             | R  | 1.92       | 0.90 | 4.09  | 0.1097                | 1.84                  | 0.81 | 4.15  | 0.19385               |
| TNF       | rs1800750   | G/A                                 | 6   | 0.05            | 3868                              | All    | SMA               | 0.05         | 423                             | R  | 0.53       | 0.07 | 4.01  | 0.5007                | 0.72                  | 0.09 | 5.54  | 0.5090                |
| TNF       | rs3093662   | A/G                                 | 6   | 0.11            | 3936                              | All    | SMA               | 0.10         | 682                             | R  | 0.43       | 0.16 | 1.20  | 0.0698                | 0.45                  | 0.16 | 1.26  | 0.072694              |
| TNF       | rs361525    | G/A                                 | 6   | 0.07            | 3948                              | All    | SMA               | 0.06         | 684                             | R  | -          | -    | -     | -                     | -                     | -    | -     | -                     |
|           |             |                                     |     |                 |                                   |        |                   |              |                                 |    |            |      |       |                       |                       |      |       |                       |

|                |                                 |     |    |      |      |     |     |      |     |    |      |      |       |                        |      |      |       |                        |
|----------------|---------------------------------|-----|----|------|------|-----|-----|------|-----|----|------|------|-------|------------------------|------|------|-------|------------------------|
| <i>MKI67</i>   | rs148494166                     | T/C | 10 | 0.00 | 3913 | All | SMA | 0.00 | 645 | H  | 0.40 | 0.05 | 3.04  | 0.3102                 | 0.33 | 0.04 | 2.54  | 0.31262                |
| <i>HBB</i>     | rs334                           | A/T | 11 | 0.08 | 3949 | All | SMA | 0.02 | 683 | H  | 0.07 | 0.04 | 0.15  | 2.11×10 <sup>-31</sup> | 0.07 | 0.03 | 0.17  | 2.61×10 <sup>-31</sup> |
| <i>RRM1</i>    | rs116472045                     | A/G | 11 | 0.02 | 3939 | All | SMA | 0.02 | 666 | R  | -    | -    | -     | -                      | -    | -    | -     | -                      |
| <i>RTN3</i>    | rs542998                        | T/C | 11 | 0.43 | 3929 | All | SMA | 0.45 | 546 | D  | 1.14 | 0.94 | 1.39  | 0.1843                 | 1.15 | 0.94 | 1.41  | 0.1740                 |
| <i>TRIM5</i>   | rs7935564                       | G/A | 11 | 0.44 | 3871 | All | SMA | 0.47 | 554 | D  | 1.24 | 1.01 | 1.51  | 0.0381                 | 1.18 | 0.95 | 1.47  | 0.032002               |
| <i>CAND1</i>   | rs10459266                      | C/A | 12 | 0.21 | 3938 | All | SMA | 0.23 | 667 | D  | 1.22 | 1.03 | 1.44  | 0.0218                 | 1.23 | 1.03 | 1.48  | 0.0210                 |
| <i>CAND1</i>   | rs12307123                      | C/T | 12 | 0.23 | 3933 | All | SMA | 0.24 | 666 | D  | 1.14 | 0.97 | 1.35  | 0.1207                 | 1.16 | 0.97 | 1.38  | 0.083643               |
| <i>CAND1</i>   | rs1566830                       | G/T | 12 | 0.26 | 3940 | All | SMA | 0.28 | 666 | A  | 1.13 | 0.99 | 1.29  | 0.0768                 | 1.13 | 0.98 | 1.30  | 0.0594                 |
| <i>GRIP1</i>   | rs1394263                       | T/C | 12 | 0.26 | 3914 | All | SMA | 0.28 | 661 | A  | 1.13 | 0.99 | 1.29  | 0.0741                 | 1.13 | 0.99 | 1.30  | 0.057273               |
| <i>IL22</i>    | rs1012356                       | A/T | 12 | 0.49 | 3940 | All | SMA | 0.49 | 685 | H  | 1.18 | 1.00 | 1.39  | 0.0455                 | 1.17 | 0.99 | 1.40  | 0.0560                 |
| <i>IL22</i>    | rs2227478                       | A/G | 12 | 0.38 | 3939 | All | SMA | 0.38 | 686 | R  | 0.85 | 0.67 | 1.08  | 0.1800                 | 0.87 | 0.68 | 1.12  | 0.20618                |
| <i>IL22</i>    | rs2227485                       | G/A | 12 | 0.42 | 3928 | All | SMA | 0.41 | 681 | H  | 1.27 | 1.08 | 1.50  | 0.0038                 | 1.27 | 1.07 | 1.51  | 0.0060                 |
| <i>IL22</i>    | rs2227491                       | C/T | 12 | 0.40 | 3870 | All | SMA | 0.40 | 676 | H  | 1.13 | 0.96 | 1.33  | 0.1469                 | 0.82 | 0.64 | 1.06  | 0.17937                |
| <i>IL22</i>    | rs2227507                       | T/C | 12 | 0.04 | 3948 | All | SMA | 0.04 | 687 | A  | 0.83 | 0.61 | 1.12  | 0.2136                 | 0.84 | 0.61 | 1.16  | 0.2545                 |
| <i>TPTE2</i>   | rs182873742                     | C/G | 13 | 0.00 | 3940 | All | SMA | 0.00 | 663 | H  | 6.43 | 0.39 | 104.8 | 0.2186                 | 5.95 | 0.26 | 135.3 | 0.21702                |
| <i>RPS6KL1</i> | rs3742785                       | C/A | 14 | 0.29 | 3714 | All | SMA | 0.32 | 650 | D  | 1.33 | 1.12 | 1.57  | 0.0010                 | 1.37 | 1.15 | 1.64  | 0.0010                 |
| <i>SPTB</i>    | rs229587                        | T/C | 14 | 0.34 | 3872 | All | SMA | 0.35 | 660 | R  | 1.13 | 0.88 | 1.45  | 0.3452                 | 1.07 | 0.81 | 1.39  | 0.33503                |
| <i>YLPM1</i>   | rs10139016                      | C/T | 14 | 0.25 | 3937 | All | SMA | 0.28 | 666 | D  | 1.25 | 1.06 | 1.47  | 0.0095                 | 1.26 | 1.06 | 1.51  | 0.0104                 |
| <i>ADCY9</i>   | rs10775349                      | C/G | 16 | 0.20 | 3941 | All | SMA | 0.21 | 557 | H  | 1.08 | 0.89 | 1.30  | 0.4300                 | 1.06 | 0.87 | 1.30  | 0.40226                |
| <i>ADCY9</i>   | rs2230739                       | A/G | 16 | 0.09 | 3944 | All | SMA | 0.08 | 558 | R  | 0.49 | 0.12 | 2.07  | 0.2842                 | 0.50 | 0.12 | 2.13  | 0.2861                 |
| <i>HBA</i>     | α <sup>-3.7</sup> -thalassaemia | I/D | 16 | 0.41 | 3946 | All | SMA | 0.34 | 639 | A  | 0.72 | 0.64 | 0.82  | 1.55×10 <sup>-6</sup>  | 0.72 | 0.65 | 0.84  | 5.45×10 <sup>-6</sup>  |
| <i>IL4</i>     | rs2243250                       | T/C | 16 | 0.20 | 3902 | All | SMA | 0.21 | 677 | R  | 0.69 | 0.43 | 1.11  | 0.1067                 | 1.02 | 0.87 | 1.19  | 0.6437                 |
| <i>IL4R</i>    | rs1805015                       | T/C | 16 | 0.42 | 3927 | All | SMA | 0.42 | 684 | D  | 0.97 | 0.82 | 1.15  | 0.7331                 | 1.03 | 0.86 | 1.24  | 0.64537                |
| <i>ADORA2B</i> | rs2535611                       | T/C | 17 | 0.10 | 3911 | All | SMA | 0.11 | 554 | A  | 1.07 | 0.87 | 1.30  | 0.5378                 | 1.01 | 0.81 | 1.25  | 0.5881                 |
| <i>NOS2</i>    | rs1800482                       | G/C | 17 | 0.08 | 3922 | All | SMA | 0.07 | 683 | R  | 0.46 | 0.11 | 1.96  | 0.2429                 | 0.22 | 0.04 | 1.40  | 0.24753                |
| <i>NOS2</i>    | rs2297518                       | G/A | 17 | 0.14 | 3910 | All | SMA | 0.14 | 553 | R  | 0.87 | 0.45 | 1.71  | 0.6893                 | 0.98 | 0.50 | 1.93  | 0.7002                 |
| <i>NOS2</i>    | rs8078340                       | C/T | 17 | 0.21 | 3948 | All | SMA | 0.20 | 686 | A  | 0.96 | 0.83 | 1.11  | 0.5666                 | 0.93 | 0.80 | 1.08  | 0.42929                |
| <i>NOS2</i>    | rs9282799                       | C/T | 17 | 0.03 | 3949 | All | SMA | 0.03 | 685 | R  | -    | -    | -     | -                      | -    | -    | -     | -                      |
| <i>TBX2</i>    | rs73991577                      | A/G | 17 | 0.00 | 3937 | All | SMA | 0.00 | 667 | H  | 0.27 | 0.04 | 2.03  | 0.1199                 | 0.33 | 0.04 | 2.54  | 0.12192                |
| <i>EMR1</i>    | rs373533                        | G/T | 19 | 0.46 | 3863 | All | SMA | 0.49 | 551 | D  | 1.14 | 0.93 | 1.40  | 0.2161                 | 1.10 | 0.89 | 1.36  | 0.2489                 |
| <i>EMR1</i>    | rs461645                        | C/T | 19 | 0.47 | 3933 | All | SMA | 0.49 | 558 | A  | 1.07 | 0.95 | 1.22  | 0.2667                 | 1.06 | 0.93 | 1.21  | 0.24864                |
| <i>ICAM</i>    | rs5498                          | A/G | 19 | 0.11 | 3908 | All | SMA | 0.12 | 677 | H  | 1.07 | 0.88 | 1.31  | 0.4818                 | 1.02 | 0.83 | 1.27  | 0.5481                 |
| <i>GNAS</i>    | rs8386                          | C/T | 20 | 0.19 | 3944 | All | SMA | 0.19 | 686 | R  | 1.39 | 0.92 | 2.09  | 0.1278                 | 1.35 | 0.88 | 2.07  | 0.11859                |
| <i>DERL3</i>   | rs1128127                       | G/A | 22 | 0.50 | 3911 | All | SMA | 0.47 | 684 | R  | 0.88 | 0.72 | 1.07  | 0.1880                 | 0.84 | 0.68 | 1.04  | 0.2062                 |
| <i>CD40LG</i>  | rs1126535                       | T/C | X  | 0.15 | 3934 | M+F | SMA | 0.16 | 686 | H  | 0.75 | 0.56 | 0.99  | 0.0416                 | 0.75 | 0.56 | 1.02  | 0.071258               |
| <i>CD40LG</i>  | rs1126535                       | T/C | X  | 0.16 | 1947 | F   | SMA | 0.13 | 328 | D  | 0.75 | 0.57 | 0.99  | 0.0393                 | 0.77 | 0.61 | 0.99  | 0.0393                 |
| <i>CD40LG</i>  | rs1126535                       | C/T | X  | 0.85 | 1987 | M   | SMA | 0.81 | 358 | HM | 0.74 | 0.55 | 1.00  | 0.0528                 | 0.76 | 0.58 | 1.10  | 0.056789               |
| <i>CD40LG</i>  | rs3092945                       | T/C | X  | 0.21 | 3927 | M+F | SMA | 0.26 | 683 | A  | 1.17 | 1.05 | 1.31  | 0.0038                 | 1.18 | 1.06 | 1.33  | 0.0031                 |
| <i>CD40LG</i>  | rs3092945                       | T/C | X  | 0.21 | 1942 | F   | SMA | 0.26 | 328 | A  | 1.33 | 1.10 | 1.62  | 0.0037                 | 1.36 | 1.12 | 1.64  | 0.001                  |
| <i>CD40LG</i>  | rs3092945                       | C/T | X  | 0.78 | 1985 | M   | SMA | 0.74 | 355 | HM | 0.81 | 0.63 | 1.05  | 0.1224                 | 0.79 | 0.61 | 1.02  | 0.0700                 |
| <i>G6PD</i>    | rs1050828                       | C/T | X  | 0.19 | 3940 | M+F | SMA | 0.23 | 680 | R  | 1.60 | 1.26 | 2.03  | 0.0002                 | 1.73 | 1.34 | 2.23  | 0.000171               |
| <i>G6PD</i>    | rs1050828                       | C/T | X  | 0.20 | 1951 | F   | SMA | 0.17 | 325 | H  | 0.79 | 0.61 | 1.03  | 0.0743                 | 0.78 | 0.60 | 1.02  | 0.0600                 |
| <i>G6PD</i>    | rs1050828                       | C/T | X  | 0.19 | 1989 | M   | SMA | 0.28 | 355 | HM | 1.72 | 1.32 | 2.23  | 6.98×10 <sup>-5</sup>  | 1.68 | 1.30 | 2.17  | 0.0001                 |
| <i>G6PD</i>    | rs1050829                       | T/C | X  | 0.40 | 3928 | M+F | SMA | 0.45 | 680 | R  | 1.30 | 1.08 | 1.56  | 0.0054                 | 1.16 | 1.03 | 1.31  | 0.0138                 |
| <i>G6PD</i>    | rs1050829                       | T/C | X  | 0.41 | 1952 | F   | SMA | 0.41 | 325 | R  | 1.06 | 0.77 | 1.45  | 0.7268                 | 1.09 | 0.79 | 1.55  | 0.72678                |
| <i>G6PD</i>    | rs1050829                       | C/T | X  | 0.60 | 1976 | M   | SMA | 0.51 | 355 | HM | 0.69 | 0.55 | 0.87  | 0.0016                 | 0.71 | 0.58 | 0.90  | 0.0017                 |

\* The rs8176719 polymorphism identifies blood-group O in the homozygous deletion form. The derived allele of rs8176746 identifies blood-group B. Chr = chromosome; DAF = derived allele frequency; MO = genotype model [A – additive, D – dominant, H – heterozygote, HM – hemizygous males, R – recessive] with respect to the derived allele; OR = Odds Ratio; LCI = Lower Confidence Interval (95%); UCI = Upper Confidence Interval; P = p-value using a logistic regression model as described in methods. § ORs and p-values unadjusted and adjusted for ethnic group, gender and rs334 genotype. All individuals having severe malarial anaemia were included in this analysis even if they were identified with multiple severe phenotypes.

**Table S5: Odds ratios for all SMA for all polymorphisms investigated.**

| Gene      | SNPID       | Alleles<br>(ancestral<br>/ derived) | Chr | DAF<br>Controls | No. of<br>genotype in<br>controls | Sample | Case<br>Phenotype | DAF<br>Cases | No. of<br>genotypes<br>in cases | MO | Unadjusted |      |      |                       | Adjusted <sup>8</sup> |      |       |                       |
|-----------|-------------|-------------------------------------|-----|-----------------|-----------------------------------|--------|-------------------|--------------|---------------------------------|----|------------|------|------|-----------------------|-----------------------|------|-------|-----------------------|
|           |             |                                     |     |                 |                                   |        |                   |              |                                 |    | OR         | LCL  | UCL  | P                     | OR                    | LCL  | UCL   | P                     |
| AJAP1     | rs113788643 | A/G                                 | 1   | 0.08            | 3940                              | All    | RD                | 0.06         | 683                             | A  | 0.81       | 0.64 | 1.02 | 0.0701                | 0.71                  | 0.43 | 1.16  | 0.1850                |
| AJAP1     | rs6674631   | G/A                                 | 1   | 0.13            | 3928                              | All    | RD                | 0.12         | 683                             | A  | 0.90       | 0.75 | 1.07 | 0.2318                | 1.33                  | 0.92 | 1.93  | 0.15938               |
| ATP2B4    | rs10900585  | G/T                                 | 1   | 0.34            | 3762                              | All    | RD                | 0.32         | 680                             | R  | 1.38       | 1.02 | 1.87 | 0.0155                | 1.13                  | 0.52 | 2.44  | 0.0151                |
| ATP2B4    | rs1541255   | A/G                                 | 1   | 0.33            | 3933                              | All    | RD                | 0.30         | 684                             | R  | 0.62       | 0.46 | 0.85 | 0.0019                | 0.64                  | 0.46 | 0.88  | 0.002                 |
| ATP2B4    | rs3753036   | G/A                                 | 1   | 0.04            | 3939                              | All    | RD                | 0.04         | 684                             | H  | 0.82       | 0.59 | 1.13 | 0.2162                | 0.83                  | 0.60 | 1.14  | 0.2218                |
| ATP2B4    | rs4951074   | G/A                                 | 1   | 0.32            | 3934                              | All    | RD                | 0.29         | 683                             | R  | 0.65       | 0.47 | 0.90 | 0.0059                | 0.66                  | 0.52 | 0.91  | 0.0057                |
| ATP2B4    | rs55868763  | G/C                                 | 1   | 0.33            | 3931                              | All    | RD                | 0.30         | 683                             | R  | 0.63       | 0.47 | 0.87 | 0.0025                | 0.65                  | 0.54 | 0.90  | 0.0030                |
| CR1       | rs17047660  | A/G                                 | 1   | 0.16            | 3923                              | All    | RD                | 0.17         | 683                             | A  | 1.10       | 0.94 | 1.29 | 0.2219                | 1.22                  | 0.90 | 1.66  | 0.33548               |
| CR1       | rs17047661  | G/A                                 | 1   | 0.32            | 3934                              | All    | RD                | 0.34         | 683                             | A  | 1.08       | 0.95 | 1.22 | 0.2427                | 1.22                  | 0.73 | 2.03  | 0.2094                |
| DARC      | rs2814778   | G/A                                 | 1   | 0.00            | 3944                              | All    | RD                | 0.00         | 601                             | H  | 0.83       | 0.18 | 3.71 | 0.8003                | 0.87                  | 0.22 | 4.21  | 0.34691               |
| GBP7      | rs1803632   | G/C                                 | 1   | 0.49            | 3942                              | All    | RD                | 0.52         | 683                             | R  | 1.22       | 1.01 | 1.47 | 0.0361                | 1.23                  | 1.10 | 1.53  | 0.0360                |
| IL10      | rs1800890   | A/T                                 | 1   | 0.24            | 3945                              | All    | RD                | 0.23         | 685                             | R  | 0.75       | 0.51 | 1.09 | 0.1200                | 0.75                  | 0.51 | 1.11  | 0.12                  |
| IL10      | rs1800896   | T/C                                 | 1   | 0.38            | 3943                              | All    | RD                | 0.35         | 684                             | D  | 0.89       | 0.76 | 1.05 | 0.1787                | 0.74                  | 0.44 | 1.25  | 0.2693                |
| IL10      | rs3024500   | G/A                                 | 1   | 0.45            | 3928                              | All    | RD                | 0.48         | 682                             | A  | 1.12       | 0.99 | 1.26 | 0.0658                | 1.36                  | 0.98 | 1.90  | 0.057556              |
| LPHN2     | rs146428334 | A/G                                 | 1   | 0.00            | 3930                              | All    | RD                | 0.00         | 684                             | H  | 1.12       | 0.47 | 2.70 | 0.8015                | 1.54                  | 0.36 | 6.61  | 0.5752                |
| LPHN2     | rs4650365   | T/C                                 | 1   | 0.20            | 3936                              | All    | RD                | 0.19         | 684                             | H  | 0.88       | 0.74 | 1.05 | 0.1587                | 0.77                  | 0.28 | 2.11  | 0.48287               |
| LPHN2     | rs72933304  | C/A                                 | 1   | 0.09            | 3942                              | All    | RD                | 0.07         | 683                             | H  | 0.83       | 0.66 | 1.03 | 0.0975                | 0.85                  | 0.68 | 1.07  | 0.1122                |
| LPHN2     | rs72933310  | T/C                                 | 1   | 0.09            | 3927                              | All    | RD                | 0.08         | 683                             | H  | 0.89       | 0.72 | 1.10 | 0.2667                | 1.14                  | 0.75 | 1.74  | 0.52604               |
| LPHN2     | rs72933350  | T/C                                 | 1   | 0.05            | 3940                              | All    | RD                | 0.05         | 684                             | H  | 2.35       | 0.60 | 9.19 | 0.2479                | 1.47                  | 0.92 | 2.35  | 0.1538                |
| IL1A      | rs17561     | G/T                                 | 2   | 0.16            | 3938                              | All    | RD                | 0.19         | 685                             | A  | 1.20       | 1.03 | 1.39 | 0.0203                | 2.39                  | 1.13 | 5.09  | 0.064612              |
| IL1B      | rs1143634   | C/T                                 | 2   | 0.11            | 3941                              | All    | RD                | 0.11         | 683                             | R  | 0.78       | 0.35 | 1.73 | 0.5252                | 0.81                  | 0.55 | 1.20  | 0.3628                |
| LAPTM4A   | rs973128    | C/G                                 | 2   | 0.44            | 3885                              | All    | RD                | 0.44         | 675                             | H  | 1.05       | 0.89 | 1.24 | 0.5620                | 1.07                  | 0.90 | 1.27  | 0.067                 |
| LOC727982 | rs10188961  | A/G                                 | 2   | 0.40            | 3934                              | All    | RD                | 0.43         | 682                             | A  | 1.16       | 1.03 | 1.30 | 0.0165                | 1.17                  | 0.93 | 1.47  | 0.1616                |
| LOC727982 | rs1371474   | T/C                                 | 2   | 0.27            | 3933                              | All    | RD                | 0.29         | 685                             | H  | 1.38       | 1.17 | 1.63 | 0.0001                | 1.69                  | 1.22 | 2.35  | 0.002967              |
| LOC727982 | rs1371478   | C/T                                 | 2   | 0.27            | 3909                              | All    | RD                | 0.29         | 682                             | H  | 1.39       | 1.18 | 1.64 | 0.0001                | 1.47                  | 1.23 | 1.74  | 0.0002                |
| SDC1      | rs11899121  | C/G                                 | 2   | 0.47            | 3921                              | All    | RD                | 0.48         | 684                             | H  | 1.07       | 0.91 | 1.26 | 0.3948                | 1.27                  | 0.87 | 1.85  | 0.29507               |
| ZSWIM2    | rs144778284 | C/T                                 | 2   | 0.00            | 3937                              | All    | RD                | 0.00         | 684                             | R  | -          | -    | -    | -                     | -                     | -    | -     | -                     |
| ZSWIM2    | rs4316902   | A/G                                 | 2   | 0.18            | 3910                              | All    | RD                | 0.16         | 677                             | R  | 0.70       | 0.41 | 1.19 | 0.1706                | 0.79                  | 0.53 | 1.16  | 0.16013               |
| ARL14     | rs74954675  | A/C                                 | 3   | 0.08            | 3907                              | All    | RD                | 0.09         | 677                             | H  | 1.15       | 0.92 | 1.44 | 0.2251                | 1.05                  | 0.70 | 1.60  | 0.8342                |
| ARL14     | rs75731597  | A/C                                 | 3   | 0.08            | 3491                              | All    | RD                | 0.10         | 670                             | H  | 1.23       | 0.98 | 1.53 | 0.0663                | 1.28                  | 0.99 | 1.59  | 0.089                 |
| ARL14     | rs76033371  | A/G                                 | 3   | 0.09            | 3939                              | All    | RD                | 0.10         | 679                             | H  | 1.19       | 0.96 | 1.47 | 0.1146                | 1.08                  | 0.73 | 1.60  | 0.7454                |
| B3GALNT1  | rs12107243  | G/C                                 | 3   | 0.49            | 3934                              | All    | RD                | 0.47         | 683                             | D  | 0.87       | 0.72 | 1.04 | 0.1342                | 0.93                  | 0.74 | 1.18  | 0.39756               |
| IL17RD    | rs6780995   | A/G                                 | 3   | 0.41            | 3939                              | All    | RD                | 0.41         | 685                             | D  | 0.98       | 0.83 | 1.17 | 0.8498                | 0.98                  | 0.63 | 1.51  | 0.8753                |
| IL17RE    | rs708567    | A/G                                 | 3   | 0.50            | 3881                              | All    | RD                | 0.49         | 680                             | D  | 0.94       | 0.78 | 1.13 | 0.5045                | 0.81                  | 0.64 | 1.02  | 0.11682               |
| TLR9      | rs187084    | T/C                                 | 3   | 0.33            | 3933                              | All    | RD                | 0.32         | 601                             | D  | 0.87       | 0.74 | 1.04 | 0.1273                | 0.90                  | 0.81 | 1.58  | 0.4593                |
| FREM3     | rs149914432 | A/C                                 | 4   | 0.10            | 3915                              | All    | RD                | 0.06         | 682                             | D  | 0.55       | 0.43 | 0.71 | 9.65×10 <sup>-7</sup> | 0.48                  | 0.24 | 0.95  | 0.002561              |
| FREM3     | rs184895969 | C/T                                 | 4   | 0.00            | 3940                              | All    | RD                | 0.00         | 684                             | H  | 1.03       | 0.43 | 2.48 | 0.9486                | 1.04                  | 0.55 | 3.40  | 0.0633                |
| FREM3     | rs184908374 | G/A                                 | 4   | 0.00            | 3943                              | All    | RD                | 0.00         | 684                             | H  | 1.05       | 0.40 | 2.77 | 0.9185                | 1.06                  | 0.50 | 2.80  | 0.12848               |
| FREM3     | rs186790584 | A/T                                 | 4   | 0.10            | 3941                              | All    | RD                | 0.06         | 684                             | D  | 0.54       | 0.42 | 0.70 | 6.55×10 <sup>-7</sup> | 0.53                  | 0.40 | 0.7   | 0.0033                |
| FREM3     | rs186873296 | A/G                                 | 4   | 0.10            | 3926                              | All    | RD                | 0.05         | 682                             | D  | 0.53       | 0.41 | 0.69 | 4.67×10 <sup>-7</sup> | 0.61                  | 0.44 | 0.83  | 6.45×10 <sup>-5</sup> |
| GAB1      | rs7663712   | A/G                                 | 4   | 0.02            | 3938                              | All    | RD                | 0.03         | 684                             | H  | 1.21       | 0.85 | 1.73 | 0.3060                | 1.22                  | 0.19 | 1.38  | 0.1530                |
| INPP4B    | rs13103597  | C/T                                 | 4   | 0.27            | 3925                              | All    | RD                | 0.23         | 683                             | A  | 0.78       | 0.66 | 0.93 | 0.0040                | 0.82                  | 0.72 | 0.94  | 0.004952              |
| INPP4B    | rs77389579  | G/T                                 | 4   | 0.07            | 3937                              | All    | RD                | 0.04         | 683                             | A  | 0.58       | 0.44 | 0.78 | 8.53×10 <sup>-5</sup> | 0.62                  | 0.46 | 0.83  | 9.54×10 <sup>-5</sup> |
| TLR1      | rs4833095   | C/T                                 | 4   | 0.09            | 3921                              | All    | RD                | 0.10         | 600                             | R  | 1.79       | 0.84 | 3.79 | 0.1499                | 1.31                  | 0.90 | 1.89  | 0.070727              |
| TLR6      | rs5743809   | T/C                                 | 4   | 0.06            | 3884                              | All    | RD                | 0.06         | 576                             | R  | 1.85       | 0.61 | 5.67 | 0.3081                | 3.71                  | 0.81 | 17.04 | 0.1424                |
| TLR6      | rs5743810   | C/T                                 | 4   | 0.02            | 3936                              | All    | RD                | 0.02         | 602                             | R  | -          | -    | -    | -                     | -                     | -    | -     | -                     |
| USP38     | rs28459062  | T/C                                 | 4   | 0.16            | 3931                              | All    | RD                | 0.17         | 684                             | R  | 1.35       | 0.87 | 2.11 | 0.1952                | 1.05                  | 0.78 | 1.43  | 0.5949                |
| USP38     | rs4266246   | C/T                                 | 4   | 0.22            | 3928                              | All    | RD                | 0.22         | 684                             | A  | 1.02       | 0.88 | 1.17 | 0.8077                | 1.34                  | 0.69 | 2.61  | 0.29847               |
| C6        | rs1801033   | A/C                                 | 5   | 0.47            | 3927                              | All    | RD                | 0.48         | 600                             | H  | 1.08       | 0.91 | 1.28 | 0.3912                | 0.72                  | 0.51 | 1.02  | 0.0586                |
| IL13      | rs20541     | C/T                                 | 5   | 0.22            | 3796                              | All    | RD                | 0.22         | 579                             | H  | 0.98       | 0.81 | 1.18 | 0.8427                | 0.99                  | 0.86 | 1.48  | 0.34347               |
| IRF       | rs2706384   | C/A                                 | 5   | 0.38            | 3819                              | All    | RD                | 0.36         | 586                             | A  | 0.94       | 0.83 | 1.07 | 0.3591                | 1.06                  | 0.67 | 1.69  | 0.5697                |
| CTLA      | rs2242665   | A/G                                 | 6   | 0.26            | 3853                              | All    | RD                | 0.28         | 591                             | R  | 1.20       | 0.87 | 1.65 | 0.2804                | 1.32                  | 1.02 | 1.70  | 0.025206              |
| GABBR1    | rs192151845 | G/A                                 | 6   | 0.01            | 3943                              | All    | RD                | 0.01         | 683                             | H  | 1.30       | 0.70 | 2.39 | 0.4154                | 1.32                  | 0.73 | 3.67  | 0.8750                |
| HCG4      | rs114980857 | C/T                                 | 6   | 0.21            | 3843                              | All    | RD                | 0.20         | 669                             | A  | 0.90       | 0.78 | 1.04 | 0.1628                | 0.89                  | 0.67 | 1.19  | 0.57831               |
| HSPA1B    | rs6457452   | C/T                                 | 6   | 0.19            | 3917                              | All    | RD                | 0.19         | 675                             | A  | 0.96       | 0.83 | 1.12 | 0.6348                | 0.85                  | 0.63 | 1.16  | 0.2810                |
| IL20RA    | rs1555498   | C/T                                 | 6   | 0.46            | 3947                              | All    | RD                | 0.48         | 683                             | H  | 0.86       | 0.73 | 1.01 | 0.0613                | 0.87                  | 0.61 | 1.24  | 0.30236               |
| LTA       | rs2239704   | G/T                                 | 6   | 0.12            | 3896                              | All    | RD                | 0.13         | 673                             | R  | 1.60       | 0.89 | 2.85 | 0.1316                | 1.32                  | 0.91 | 1.91  | 0.0873                |
| LTA       | rs909253    | T/C                                 | 6   | 0.49            | 3921                              | All    | RD                | 0.49         | 680                             | H  | 1.13       | 0.96 | 1.33 | 0.1358                | 1.00                  | 0.79 | 1.25  | 0.91093               |
| PLEKHG1   | rs114726617 | G/A                                 | 6   | 0.04            | 3940                              | All    | RD                | 0.05         | 684                             | D  | 1.29       | 0.96 | 1.72 | 0.0980                | 1.37                  | 0.77 | 2.44  | 0.3355                |
| PLEKHG1   | rs141555199 | C/G                                 | 6   | 0.02            | 3943                              | All    | RD                | 0.03         | 684                             | H  | 1.30       | 0.89 | 1.89 | 0.1833                | 1.32                  | 0.90 | 1.95  | 0.67514               |
| PLEKHG1   | rs142712208 | G/A                                 | 6   | 0.03            | 3927                              | All    | RD                | 0.04         | 685                             | H  | 1.36       | 1.00 | 1.86 | 0.0563                | 1.38                  | 0.74 | 2.57  | 0.3974                |
| PLEKHG1   | rs15116938  | C/T                                 | 6   | 0.03            | 3939                              | All    | RD                | 0.04         | 684                             | H  | 1.26       | 0.92 | 1.72 | 0.1537                | 1.31                  | 0.94 | 1.82  | 0.49189               |
| PLEKHG1   | rs151293197 | C/G                                 | 6   | 0.03            | 3940                              | All    | RD                | 0.04         | 683                             | H  | 1.27       | 0.93 | 1.73 | 0.1466                | 1.32                  | 0.71 | 2.46  | 0.4501                |
| PLEKHG1   | rs2131263   | C/T                                 | 6   | 0.04            | 3938                              | All    | RD                | 0.05         | 684                             | D  | 1.29       | 0.96 | 1.72 | 0.0985                | 1.37                  | 0.77 | 2.44  | 0.33629               |
| PLEKHG1   | rs55958968  | A/G                                 | 6   | 0.05            | 3932                              | All    | RD                | 0.06         | 684                             | H  | 1.17       | 0.90 | 1.52 | 0.2575                | 1.39                  | 0.85 | 2.25  | 0.1400                |
| PLEKHG1   | rs76924464  | G/A                                 | 6   | 0.03            | 3940                              | All    | RD                | 0.04         | 684                             | H  | 1.28       | 0.94 | 1.74 | 0.1315                | 1.29                  | 0.69 | 2.40  | 0.48015               |
| PLEKHG1   | rs79100774  | G/C                                 | 6   | 0.03            | 3939                              | All    | RD                | 0.04         | 683                             | H  | 1.25       | 0.92 | 1.71 | 0.1646                | 1.29                  | 0.69 | 2.41  | 0.4816                |
| SNORD48   | rs116288147 | C/T                                 | 6   | 0.24            | 3896                              | All    | RD                | 0.24         | 675                             | R  | 1.05       | 0.75 | 1.49 | 0.7679                | 1.07                  | 0.81 | 1.59  | 0.7787                |
| TNF       | rs1799964   | T/C                                 | 6   | 0.27            | 3938                              | All    | RD                | 0.27         | 676                             | R  | 0.91       | 0.66 | 1.26 | 0.5853                | 0.95                  | 0.70 | 1.34  | 0.6790                |
| TNF       | rs1800629   | G/A                                 | 6   | 0.09            | 3940                              | All    | RD                | 0.09         | 684                             | R  | 1.92       | 0.90 | 4.09 | 0.1094                | 1.97                  | 0.98 | 4.95  | 0.1199                |
| TNF       | rs1800750   | G/A                                 | 6   | 0.05            | 3868                              | All    | RD                | 0.04         | 352                             | H  | 0.71       | 0.47 | 1.08 | 0.0987                | 0.67                  | 0.25 | 1.81  | 0.3678                |
| TNF       | rs3093662   | A/G                                 | 6   | 0.11            | 3936                              | All    | RD                | 0.11         | 682                             | R  | 0.53       | 0.21 | 1.33 | 0.1384                | 0.87                  | 0.57 | 1.32  | 0.54979               |
| TNF       | rs361525    | G/A                                 | 6   | 0.07            | 3948                              | All    | RD                | 0.07         | 685                             | R  | 0.52       | 0.12 | 2.22 | 0.3342                | 0.54                  | 0.19 | 3.21  |                       |

|                |                                 |     |    |      |      |     |    |      |     |    |      |      |      |                        |      |      |      |                        |
|----------------|---------------------------------|-----|----|------|------|-----|----|------|-----|----|------|------|------|------------------------|------|------|------|------------------------|
| <i>HBB</i>     | rs334                           | A/T | 11 | 0.08 | 3949 | All | RD | 0.02 | 684 | H  | 0.11 | 0.06 | 0.20 | 8.41×10 <sup>-28</sup> | 0.11 | 0.06 | 0.20 | 1.62×10 <sup>-27</sup> |
| <i>RRM1</i>    | rs116472045                     | A/G | 11 | 0.02 | 3939 | All | RD | 0.01 | 682 | R  | -    | -    | -    | -                      | -    | -    | -    | -                      |
| <i>RTN3</i>    | rs542998                        | T/C | 11 | 0.43 | 3929 | All | RD | 0.44 | 592 | R  | 1.16 | 0.93 | 1.43 | 0.1864                 | 0.82 | 0.58 | 1.15 | 0.3977                 |
| <i>TRIM5</i>   | rs7935564                       | G/A | 11 | 0.44 | 3871 | All | RD | 0.47 | 598 | A  | 1.15 | 1.01 | 1.30 | 0.0289                 | 1.29 | 0.87 | 1.90 | 0.091014               |
| <i>CAND1</i>   | rs10459266                      | C/A | 12 | 0.21 | 3938 | All | RD | 0.23 | 684 | D  | 1.22 | 1.03 | 1.44 | 0.0217                 | 1.75 | 1.26 | 2.42 | 0.0009                 |
| <i>CAND1</i>   | rs12307123                      | C/T | 12 | 0.23 | 3933 | All | RD | 0.25 | 682 | D  | 1.24 | 1.05 | 1.46 | 0.0113                 | 1.17 | 0.90 | 1.52 | 0.17144                |
| <i>CAND1</i>   | rs1566830                       | G/T | 12 | 0.26 | 3940 | All | RD | 0.29 | 684 | A  | 1.20 | 1.06 | 1.37 | 0.0049                 | 1.76 | 1.04 | 2.98 | 0.0409                 |
| <i>GRIP1</i>   | rs1394263                       | T/C | 12 | 0.19 | 3944 | All | RD | 0.18 | 683 | H  | 0.92 | 0.77 | 1.09 | 0.3299                 | 0.95 | 0.90 | 2.95 | 0.3499                 |
| <i>IL22</i>    | rs1012356                       | A/T | 12 | 0.49 | 3940 | All | RD | 0.49 | 683 | H  | 1.08 | 0.92 | 1.28 | 0.3359                 | 1.09 | 0.93 | 1.31 | 0.4368                 |
| <i>IL22</i>    | rs2227478                       | A/G | 12 | 0.38 | 3939 | All | RD | 0.38 | 685 | R  | 0.89 | 0.71 | 1.13 | 0.3382                 | 0.90 | 0.72 | 1.73 | 0.24654                |
| <i>IL22</i>    | rs2227485                       | G/A | 12 | 0.42 | 3928 | All | RD | 0.43 | 682 | H  | 1.12 | 0.95 | 1.32 | 0.1632                 | 1.14 | 0.97 | 1.33 | 0.1789                 |
| <i>IL22</i>    | rs2227491                       | C/T | 12 | 0.40 | 3870 | All | RD | 0.40 | 672 | R  | 0.92 | 0.74 | 1.16 | 0.4873                 | 0.97 | 0.81 | 1.57 | 0.38947                |
| <i>IL22</i>    | rs2227507                       | T/C | 12 | 0.04 | 3948 | All | RD | 0.05 | 685 | H  | 1.09 | 0.81 | 1.46 | 0.5699                 | 1.10 | 0.82 | 1.48 | 0.4098                 |
| <i>TPTE2</i>   | rs182873742                     | C/G | 13 | 0.00 | 3940 | All | RD | 0.00 | 678 | H  | -    | -    | -    | -                      | -    | -    | -    | -                      |
| <i>RPS6KL1</i> | rs3742785                       | C/A | 14 | 0.29 | 3714 | All | RD | 0.28 | 656 | H  | 1.06 | 0.89 | 1.26 | 0.4599                 | 1.06 | 0.89 | 1.27 | 0.5001                 |
| <i>SPTB</i>    | rs229587                        | T/C | 14 | 0.34 | 3872 | All | RD | 0.34 | 677 | R  | 1.03 | 0.80 | 1.32 | 0.8388                 | 1.09 | 0.89 | 1.41 | 0.10252                |
| <i>YLP1</i>    | rs10139016                      | C/T | 14 | 0.25 | 3937 | All | RD | 0.24 | 684 | R  | 0.88 | 0.63 | 1.25 | 0.4820                 | 0.78 | 0.37 | 1.61 | 0.5046                 |
| <i>ADCY9</i>   | rs10775349                      | C/G | 16 | 0.20 | 3941 | All | RD | 0.20 | 601 | R  | 1.26 | 0.84 | 1.89 | 0.2805                 | 1.90 | 0.97 | 3.71 | 0.11955                |
| <i>ADCY9</i>   | rs2230739                       | A/G | 16 | 0.09 | 3944 | All | RD | 0.09 | 602 | R  | 0.64 | 0.20 | 2.12 | 0.4431                 | 0.67 | 0.32 | 3.14 | 0.4588                 |
| <i>HBA</i>     | α <sup>-3.7</sup> -thalassaemia | I/D | 16 | 0.41 | 3946 | All | RD | 0.35 | 662 | A  | 0.78 | 0.69 | 0.89 | 0.0001                 | 0.79 | 0.70 | 0.90 | 0.0002                 |
| <i>IL4</i>     | rs2243250                       | T/C | 16 | 0.20 | 3902 | All | RD | 0.22 | 678 | H  | 1.16 | 0.98 | 1.38 | 0.0868                 | 1.21 | 0.98 | 1.78 | 0.1230                 |
| <i>ILAR</i>    | rs1805015                       | T/C | 16 | 0.42 | 3927 | All | RD | 0.42 | 683 | R  | 0.87 | 0.70 | 1.09 | 0.2154                 | 1.12 | 0.81 | 1.56 | 0.63147                |
| <i>ADORA2B</i> | rs2535611                       | T/C | 17 | 0.10 | 3911 | All | RD | 0.13 | 600 | A  | 1.23 | 1.03 | 1.49 | 0.0289                 | 1.28 | 0.86 | 1.89 | 0.2169                 |
| <i>NOS2</i>    | rs1800482                       | G/C | 17 | 0.08 | 3922 | All | RD | 0.07 | 679 | D  | 0.94 | 0.75 | 1.19 | 0.6226                 | 0.98 | 0.56 | 1.21 | 0.40375                |
| <i>NOS2</i>    | rs2297518                       | G/A | 17 | 0.14 | 3910 | All | RD | 0.14 | 598 | R  | 1.17 | 0.65 | 2.08 | 0.6096                 | 2.02 | 0.85 | 4.79 | 0.1207                 |
| <i>NOS2</i>    | rs8078340                       | C/T | 17 | 0.21 | 3948 | All | RD | 0.20 | 684 | R  | 0.59 | 0.36 | 0.99 | 0.0311                 | 0.61 | 0.40 | 0.99 | 0.032                  |
| <i>NOS2</i>    | rs9282799                       | C/T | 17 | 0.03 | 3949 | All | RD | 0.03 | 682 | H  | 1.19 | 0.84 | 1.69 | 0.3324                 | 1.21 | 0.87 | 1.72 | 0.3590                 |
| <i>TBX2</i>    | rs73991577                      | A/G | 17 | 0.00 | 3937 | All | RD | 0.00 | 683 | H  | 0.27 | 0.04 | 2.05 | 0.1239                 | 0.30 | 0.10 | 2.95 | 0.21332                |
| <i>EMR1</i>    | rs373533                        | G/T | 19 | 0.46 | 3863 | All | RD | 0.47 | 598 | H  | 1.09 | 0.92 | 1.29 | 0.3338                 | 1.04 | 0.72 | 1.51 | 0.9102                 |
| <i>EMR1</i>    | rs461645                        | C/T | 19 | 0.47 | 3933 | All | RD | 0.48 | 601 | H  | 1.11 | 0.94 | 1.32 | 0.2165                 | 1.07 | 0.73 | 1.55 | 0.80482                |
| <i>ICAM</i>    | rs5498                          | A/G | 19 | 0.11 | 3908 | All | RD | 0.13 | 673 | H  | 1.16 | 0.95 | 1.41 | 0.1383                 | 1.16 | 0.98 | 3.22 | 0.3534                 |
| <i>GNAS</i>    | rs8386                          | C/T | 20 | 0.26 | 3914 | All | RD | 0.29 | 683 | A  | 1.22 | 1.07 | 1.38 | 0.0028                 | 1.25 | 1.10 | 1.43 | 0.0029                 |
| <i>DERL3</i>   | rs1128127                       | G/A | 22 | 0.50 | 3911 | All | RD | 0.47 | 683 | A  | 0.92 | 0.82 | 1.03 | 0.1591                 | 0.88 | 0.61 | 1.26 | 0.3972                 |
| <i>CD40LG</i>  | rs1126535                       | T/C | X  | 0.15 | 3934 | M+F | RD | 0.15 | 683 | H  | 0.82 | 0.62 | 1.08 | 0.1493                 | 0.59 | 0.37 | 0.94 | 0.020226               |
| <i>CD40LG</i>  | rs1126535                       | T/C | X  | 0.16 | 1947 | F   | RD | 0.14 | 326 | D  | 0.82 | 0.62 | 1.07 | 0.1314                 | 0.84 | 0.63 | 1.09 | 0.1414                 |
| <i>CD40LG</i>  | rs1126535                       | C/T | X  | 0.85 | 1987 | M   | RD | 0.83 | 357 | HM | 0.87 | 0.64 | 1.19 | 0.3922                 | 0.88 | 0.65 | 1.20 | 0.41218                |
| <i>CD40LG</i>  | rs3092945                       | T/C | X  | 0.21 | 3927 | M+F | RD | 0.24 | 680 | H  | 1.28 | 1.01 | 1.63 | 0.0468                 | 1.15 | 0.81 | 1.64 | 0.3059                 |
| <i>CD40LG</i>  | rs3092945                       | T/C | X  | 0.21 | 1942 | F   | RD | 0.24 | 325 | D  | 1.29 | 1.01 | 1.63 | 0.0387                 | 1.31 | 1.03 | 1.66 | 0.02                   |
| <i>CD40LG</i>  | rs3092945                       | C/T | X  | 0.78 | 1985 | M   | RD | 0.77 | 355 | HM | 0.95 | 0.72 | 1.24 | 0.7021                 | 0.93 | 0.71 | 1.21 | 0.6100                 |
| <i>G6PD</i>    | rs1050828                       | C/T | X  | 0.19 | 3940 | M+F | RD | 0.18 | 680 | D  | 0.90 | 0.74 | 1.09 | 0.2865                 | 1.05 | 0.64 | 1.70 | 0.64676                |
| <i>G6PD</i>    | rs1050828                       | C/T | X  | 0.20 | 1951 | F   | RD | 0.19 | 325 | H  | 0.89 | 0.58 | 1.38 | 0.6110                 | 0.88 | 0.68 | 1.14 | 0.3500                 |
| <i>G6PD</i>    | rs1050828                       | C/T | X  | 0.19 | 1989 | M   | RD | 0.17 | 355 | HM | 0.89 | 0.66 | 1.21 | 0.8900                 | 0.87 | 0.64 | 1.17 | 0.36                   |
| <i>G6PD</i>    | rs1050829                       | T/C | X  | 0.40 | 3928 | M+F | RD | 0.40 | 681 | H  | 0.88 | 0.70 | 1.12 | 0.2922                 | 0.79 | 0.51 | 1.21 | 0.4246                 |
| <i>G6PD</i>    | rs1050829                       | T/C | X  | 0.41 | 1952 | F   | RD | 0.40 | 325 | H  | 0.89 | 0.70 | 1.12 | 0.3148                 | 0.91 | 0.72 | 1.16 | 0.32475                |
| <i>G6PD</i>    | rs1050829                       | C/T | X  | 0.60 | 1976 | M   | RD | 0.61 | 356 | HM | 1.01 | 0.80 | 1.28 | 0.9095                 | 1.02 | 0.82 | 1.30 | 0.9195                 |

\* The rs8176719 polymorphism identifies blood-group O in the homozygous deletion form. The derived allele of rs8176746 identifies blood-group B. Chr = chromosome; DAF = derived allele frequency; MO = genotype model [A – additive, D – dominant, H – heterozygote, HM – hemizygous males, R – recessive] with respect to the derived allele; OR = Odds Ratio; LCI = Lower Confidence Interval (95%); UCI = Upper Confidence Interval; P = p-value using a logistic regression model as described in methods. § ORs and p-values unadjusted and adjusted for ethnic group, gender and rs334 genotype. All individuals having respiratory distress were included in this analysis even if they were identified with multiple severe phenotypes.

**Table S6: Odds ratios for all RD for all polymorphisms investigated.**

| Gene      | SNP ID      | Alleles<br>(ancestral<br>/ derived) | Chr | DAF<br>Controls | No. of<br>genotype<br>in controls | Sample | Case<br>Phenotype | DAF<br>Cases | No. of<br>genotypes<br>in cases | MO | Unadjusted |      |      |        | Adjusted <sup>§</sup> |      |      |          |
|-----------|-------------|-------------------------------------|-----|-----------------|-----------------------------------|--------|-------------------|--------------|---------------------------------|----|------------|------|------|--------|-----------------------|------|------|----------|
|           |             |                                     |     |                 |                                   |        |                   |              |                                 |    | OR         | LCL  | UCL  | P      | OR                    | LCL  | UCL  | P        |
| AJAP1     | rs113788643 | A/G                                 | 1   | 0.08            | 3940                              | All    | Other SM          | 0.08         | 430                             | R  | -          | -    | -    | -      | -                     | -    | -    | -        |
| AJAP1     | rs6674631   | G/A                                 | 1   | 0.13            | 3928                              | All    | Other SM          | 0.13         | 431                             | R  | 0.89       | 0.43 | 1.88 | 0.7641 | 0.96                  | 0.46 | 2.04 | 0.78675  |
| ATP2B4    | rs10900585  | G/T                                 | 1   | 0.34            | 3762                              | All    | Other SM          | 0.35         | 426                             | H  | 1.19       | 1.05 | 1.64 | 0.0123 | 1.04                  | 0.63 | 1.69 | 0.1783   |
| ATP2B4    | rs1541255   | A/G                                 | 1   | 0.33            | 3933                              | All    | Other SM          | 0.33         | 431                             | R  | 0.84       | 0.60 | 1.18 | 0.3120 | 0.85                  | 0.60 | 1.21 | 0.34498  |
| ATP2B4    | rs3753036   | G/A                                 | 1   | 0.04            | 3939                              | All    | Other SM          | 0.03         | 432                             | A  | 0.82       | 0.56 | 1.20 | 0.2965 | 0.78                  | 0.52 | 1.17 | 0.2440   |
| ATP2B4    | rs4951074   | G/A                                 | 1   | 0.32            | 3934                              | All    | Other SM          | 0.32         | 431                             | R  | 0.89       | 0.63 | 1.27 | 0.5203 | 1.07                  | 0.73 | 1.59 | 0.51529  |
| ATP2B4    | rs55868763  | G/C                                 | 1   | 0.33            | 3931                              | All    | Other SM          | 0.33         | 431                             | R  | 0.85       | 0.61 | 1.20 | 0.3462 | 0.90                  | 0.62 | 1.29 | 0.3814   |
| CR1       | rs17047660  | A/G                                 | 1   | 0.16            | 3923                              | All    | Other SM          | 0.16         | 436                             | H  | 0.85       | 0.67 | 1.07 | 0.1564 | 0.83                  | 0.65 | 1.05 | 0.14157  |
| CR1       | rs17047661  | G/A                                 | 1   | 0.32            | 3934                              | All    | Other SM          | 0.31         | 434                             | R  | 0.91       | 0.64 | 1.30 | 0.6158 | 0.86                  | 0.59 | 1.25 | 0.5502   |
| DARC      | rs2814778   | G/A                                 | 1   | 0.00            | 3944                              | All    | Other SM          | 0.00         | 379                             | H  | 0.58       | 0.07 | 4.45 | 0.5675 | 0.59                  | 0.08 | 4.56 | 0.56766  |
| GBP7      | rs1803632   | G/C                                 | 1   | 0.49            | 3942                              | All    | Other SM          | 0.51         | 434                             | R  | 1.18       | 0.94 | 1.47 | 0.1615 | 1.12                  | 0.89 | 1.41 | 0.1942   |
| IL10      | rs1800890   | A/T                                 | 1   | 0.24            | 3945                              | All    | Other SM          | 0.21         | 434                             | R  | 0.42       | 0.23 | 0.76 | 0.0013 | 0.43                  | 0.23 | 0.79 | 0.001385 |
| IL10      | rs1800896   | T/C                                 | 1   | 0.38            | 3943                              | All    | Other SM          | 0.35         | 433                             | R  | 0.81       | 0.60 | 1.11 | 0.1788 | 0.91                  | 0.78 | 1.06 | 0.1865   |
| IL10      | rs3024500   | G/A                                 | 1   | 0.45            | 3928                              | All    | Other SM          | 0.48         | 434                             | R  | 1.18       | 0.93 | 1.50 | 0.1701 | 1.18                  | 0.92 | 1.50 | 0.17602  |
| LPHN2     | rs146428334 | A/G                                 | 1   | 0.00            | 3930                              | All    | Other SM          | 0.01         | 430                             | H  | 1.55       | 0.60 | 4.04 | 0.3916 | 1.61                  | 0.61 | 4.26 | 0.3839   |
| LPHN2     | rs4650365   | T/C                                 | 1   | 0.20            | 3936                              | All    | Other SM          | 0.17         | 432                             | A  | 0.80       | 0.66 | 0.97 | 0.0183 | 0.82                  | 0.67 | 1.00 | 0.020669 |
| LPHN2     | rs72933304  | C/A                                 | 1   | 0.09            | 3942                              | All    | Other SM          | 0.06         | 431                             | D  | 0.67       | 0.49 | 0.91 | 0.0076 | 0.68                  | 0.50 | 0.94 | 0.0092   |
| LPHN2     | rs72933310  | T/C                                 | 1   | 0.09            | 3927                              | All    | Other SM          | 0.07         | 431                             | A  | 0.71       | 0.54 | 0.94 | 0.0132 | 0.73                  | 0.55 | 0.97 | 0.016043 |
| LPHN2     | rs72933350  | T/C                                 | 1   | 0.05            | 3940                              | All    | Other SM          | 0.03         | 430                             | A  | 0.61       | 0.41 | 0.91 | 0.0095 | 0.66                  | 0.44 | 0.99 | 0.0109   |
| IL1A      | rs17561     | G/T                                 | 2   | 0.16            | 3938                              | All    | Other SM          | 0.19         | 434                             | R  | 1.89       | 1.16 | 3.09 | 0.0162 | 1.94                  | 1.16 | 3.22 | 0.02727  |
| IL1B      | rs1143634   | C/T                                 | 2   | 0.11            | 3941                              | All    | Other SM          | 0.14         | 434                             | A  | 1.20       | 0.97 | 1.47 | 0.0905 | 1.20                  | 0.95 | 1.52 | 0.1054   |
| LAPTM4A   | rs973128    | C/G                                 | 2   | 0.44            | 3885                              | All    | Other SM          | 0.43         | 419                             | R  | 0.86       | 0.66 | 1.13 | 0.2753 | 0.87                  | 0.66 | 1.15 | 0.33759  |
| LOC727982 | rs10188961  | A/G                                 | 2   | 0.40            | 3934                              | All    | Other SM          | 0.44         | 431                             | A  | 1.20       | 1.04 | 1.39 | 0.0123 | 1.23                  | 1.06 | 1.43 | 0.0082   |
| LOC727982 | rs1371474   | T/C                                 | 2   | 0.27            | 3933                              | All    | Other SM          | 0.29         | 430                             | D  | 1.18       | 0.97 | 1.45 | 0.1032 | 1.22                  | 0.99 | 1.51 | 0.077484 |
| LOC727982 | rs1371478   | C/T                                 | 2   | 0.27            | 3909                              | All    | Other SM          | 0.29         | 429                             | D  | 1.18       | 0.97 | 1.45 | 0.0998 | 1.23                  | 1.00 | 1.52 | 0.0751   |
| SDC1      | rs11899121  | C/G                                 | 2   | 0.47            | 3921                              | All    | Other SM          | 0.44         | 429                             | R  | 0.81       | 0.62 | 1.04 | 0.0902 | 0.84                  | 0.65 | 1.09 | 0.11306  |
| ZSWIM2    | rs144778284 | C/T                                 | 2   | 0.00            | 3937                              | All    | Other SM          | 0.00         | 431                             | H  | 0.98       | 0.29 | 3.31 | 0.9741 | 1.11                  | 0.32 | 3.80 | 0.9907   |
| ZSWIM2    | rs4316902   | A/G                                 | 2   | 0.18            | 3910                              | All    | Other SM          | 0.16         | 430                             | R  | 0.42       | 0.18 | 0.96 | 0.0188 | 0.38                  | 0.16 | 0.95 | 0.007496 |
| ARL14     | rs74954675  | A/C                                 | 3   | 0.08            | 3907                              | All    | Other SM          | 0.10         | 429                             | A  | 1.15       | 0.91 | 1.47 | 0.2497 | 1.17                  | 0.91 | 1.50 | 0.2553   |
| ARL14     | rs75731597  | A/C                                 | 3   | 0.08            | 3491                              | All    | Other SM          | 0.10         | 424                             | D  | 1.21       | 0.93 | 1.58 | 0.1547 | 1.25                  | 0.95 | 1.64 | 0.16415  |
| ARL14     | rs76033371  | A/G                                 | 3   | 0.09            | 3939                              | All    | Other SM          | 0.10         | 431                             | D  | 1.14       | 0.88 | 1.47 | 0.3286 | 1.17                  | 0.90 | 1.52 | 0.3341   |
| B3GALNT1  | rs12107243  | G/C                                 | 3   | 0.49            | 3934                              | All    | Other SM          | 0.50         | 430                             | R  | 1.10       | 0.87 | 1.38 | 0.4298 | 1.16                  | 0.91 | 1.47 | 0.34802  |
| IL17RD    | rs6780995   | A/G                                 | 3   | 0.41            | 3939                              | All    | Other SM          | 0.41         | 433                             | H  | 1.27       | 1.04 | 1.55 | 0.0207 | 1.26                  | 1.03 | 1.55 | 0.0164   |
| IL17RE    | rs708567    | A/G                                 | 3   | 0.50            | 3881                              | All    | Other SM          | 0.49         | 430                             | R  | 0.84       | 0.66 | 1.07 | 0.1501 | 1.14                  | 0.93 | 1.40 | 0.14898  |
| TLR9      | rs187084    | T/C                                 | 3   | 0.33            | 3933                              | All    | Other SM          | 0.34         | 381                             | H  | 1.10       | 0.89 | 1.36 | 0.3896 | 1.13                  | 0.91 | 1.41 | 0.3953   |
| FREM3     | rs149914432 | A/C                                 | 4   | 0.10            | 3915                              | All    | Other SM          | 0.06         | 429                             | A  | 0.62       | 0.47 | 0.83 | 0.0006 | 0.76                  | 0.53 | 0.86 | 0.000667 |
| FREM3     | rs184895969 | C/T                                 | 4   | 0.00            | 3940                              | All    | Other SM          | 0.00         | 431                             | H  | 0.50       | 0.12 | 2.11 | 0.2983 | 0.54                  | 0.12 | 2.42 | 0.3061   |
| FREM3     | rs184908374 | G/A                                 | 4   | 0.00            | 3943                              | All    | Other SM          | 0.00         | 432                             | H  | 0.61       | 0.14 | 2.59 | 0.4702 | 0.67                  | 0.15 | 3.02 | 0.48043  |
| FREM3     | rs186790584 | A/T                                 | 4   | 0.10            | 3941                              | All    | Other SM          | 0.06         | 432                             | D  | 0.57       | 0.42 | 0.78 | 0.0002 | 0.60                  | 0.43 | 0.8  | 0.0002   |
| FREM3     | rs186873296 | A/G                                 | 4   | 0.10            | 3926                              | All    | Other SM          | 0.05         | 428                             | D  | 0.55       | 0.40 | 0.75 | 0.0001 | 0.56                  | 0.42 | 0.78 | 0.000195 |
| GAB1      | rs7663712   | A/G                                 | 4   | 0.02            | 3938                              | All    | Other SM          | 0.02         | 431                             | R  | -          | -    | -    | -      | -                     | -    | -    | -        |
| INPP4B    | rs13103597  | C/T                                 | 4   | 0.27            | 3925                              | All    | Other SM          | 0.24         | 431                             | A  | 0.88       | 0.75 | 1.04 | 0.1337 | 0.99                  | 0.82 | 1.19 | 0.11272  |
| INPP4B    | rs77389579  | G/T                                 | 4   | 0.07            | 3937                              | All    | Other SM          | 0.04         | 430                             | D  | 0.53       | 0.37 | 0.77 | 0.0003 | 0.60                  | 0.43 | 0.8  | 0.0004   |
| TLR1      | rs4833095   | C/T                                 | 4   | 0.09            | 3921                              | All    | Other SM          | 0.09         | 380                             | R  | 0.61       | 0.14 | 2.56 | 0.4632 | 0.54                  | 0.13 | 2.31 | 0.46587  |
| TLR6      | rs5743809   | T/C                                 | 4   | 0.06            | 3884                              | All    | Other SM          | 0.07         | 358                             | A  | 1.31       | 0.97 | 1.76 | 0.0857 | 1.35                  | 0.99 | 1.82 | 0.0759   |
| TLR6      | rs5743810   | C/T                                 | 4   | 0.02            | 3936                              | All    | Other SM          | 0.02         | 380                             | R  | -          | -    | -    | -      | -                     | -    | -    | -        |
| USP38     | rs28459062  | T/C                                 | 4   | 0.16            | 3931                              | All    | Other SM          | 0.17         | 432                             | H  | 1.26       | 1.01 | 1.56 | 0.0417 | 1.18                  | 0.94 | 1.48 | 0.0472   |
| USP38     | rs4266246   | C/T                                 | 4   | 0.22            | 3928                              | All    | Other SM          | 0.21         | 429                             | H  | 0.92       | 0.75 | 1.15 | 0.4720 | 1.10                  | 0.69 | 1.74 | 0.50541  |
| C6        | rs1801033   | A/C                                 | 5   | 0.47            | 3927                              | All    | Other SM          | 0.47         | 380                             | H  | 0.92       | 0.75 | 1.14 | 0.4473 | 0.93                  | 0.74 | 1.15 | 0.3876   |
| IL13      | rs20541     | C/T                                 | 5   | 0.22            | 3796                              | All    | Other SM          | 0.22         | 360                             | H  | 1.01       | 0.80 | 1.28 | 0.9132 | 1.02                  | 0.81 | 1.29 | 0.81604  |
| IRF       | rs2706384   | C/A                                 | 5   | 0.38            | 3819                              | All    | Other SM          | 0.35         | 365                             | D  | 0.89       | 0.72 | 1.11 | 0.3095 | 0.90                  | 0.72 | 1.13 | 0.3295   |
| CTLA4     | rs2242665   | A/G                                 | 6   | 0.26            | 3853                              | All    | Other SM          | 0.32         | 378                             | A  | 1.32       | 1.12 | 1.55 | 0.0011 | 1.33                  | 1.13 | 1.58 | 0.001307 |
| GABBR1    | rs192151845 | G/A                                 | 6   | 0.01            | 3943                              | All    | Other SM          | 0.01         | 431                             | H  | 0.97       | 0.41 | 2.27 | 0.9385 | 0.86                  | 0.34 | 2.14 | 0.9572   |
| HCG4      | rs114980857 | C/T                                 | 6   | 0.21            | 3843                              | All    | Other SM          | 0.22         | 426                             | D  | 1.04       | 0.85 | 1.28 | 0.7093 | 1.01                  | 0.85 | 1.21 | 0.77903  |
| HSPA1B    | rs6457452   | C/T                                 | 6   | 0.19            | 3917                              | All    | Other SM          | 0.16         | 434                             | D  | 0.79       | 0.64 | 0.98 | 0.0332 | 0.81                  | 0.65 | 1.01 | 0.0233   |
| IL20RA    | rs1555498   | C/T                                 | 6   | 0.46            | 3947                              | All    | Other SM          | 0.51         | 434                             | D  | 1.33       | 1.05 | 1.68 | 0.0163 | 1.29                  | 1.01 | 1.65 | 0.016524 |
| LTA       | rs2239704   | G/T                                 | 6   | 0.12            | 3896                              | All    | Other SM          | 0.15         | 425                             | H  | 1.37       | 1.09 | 1.72 | 0.0083 | 1.28                  | 1.01 | 1.62 | 0.0112   |
| LTA       | rs909253    | T/C                                 | 6   | 0.49            | 3921                              | All    | Other SM          | 0.46         | 428                             | A  | 0.92       | 0.80 | 1.06 | 0.2466 | 0.90                  | 0.70 | 1.15 | 0.28612  |
| PLEKHG1   | rs114726617 | G/A                                 | 6   | 0.04            | 3940                              | All    | Other SM          | 0.04         | 431                             | R  | -          | -    | -    | -      | -                     | -    | -    | -        |
| PLEKHG1   | rs141555199 | C/G                                 | 6   | 0.02            | 3943                              | All    | Other SM          | 0.03         | 432                             | H  | 1.55       | 1.02 | 2.35 | 0.0514 | 1.60                  | 1.02 | 2.49 | 0.043208 |
| PLEKHG1   | rs142712208 | G/A                                 | 6   | 0.03            | 3927                              | All    | Other SM          | 0.04         | 431                             | R  | -          | -    | -    | -      | -                     | -    | -    | -        |
| PLEKHG1   | rs15116938  | C/T                                 | 6   | 0.03            | 3939                              | All    | Other SM          | 0.04         | 430                             | R  | -          | -    | -    | -      | -                     | -    | -    | -        |
| PLEKHG1   | rs151293197 | C/G                                 | 6   | 0.03            | 3940                              | All    | Other SM          | 0.03         | 432                             | R  | -          | -    | -    | -      | -                     | -    | -    | -        |
| PLEKHG1   | rs2131263   | C/T                                 | 6   | 0.04            | 3938                              | All    | Other SM          | 0.04         | 430                             | R  | -          | -    | -    | -      | -                     | -    | -    | -        |
| PLEKHG1   | rs55958968  | A/G                                 | 6   | 0.05            | 3932                              | All    | Other SM          | 0.06         | 431                             | H  | 1.25       | 0.91 | 1.72 | 0.1760 | 1.22                  | 0.88 | 1.70 | 0.1995   |
| PLEKHG1   | rs76924464  | G/A                                 | 6   | 0.03            | 3940                              | All    | Other SM          | 0.03         | 431                             | R  | -          | -    | -    | -      | -                     | -    | -    | -        |
| PLEKHG1   | rs79100774  | G/C                                 | 6   | 0.03            | 3939                              | All    | Other SM          | 0.03         | 432                             | R  | -          | -    | -    | -      | -                     | -    | -    | -        |
| SNORD48   | rs116288147 | C/T                                 | 6   | 0.24            | 3896                              | All    | Other SM          | 0.21         | 428                             | D  | 0.80       | 0.65 | 0.98 | 0.0331 | 0.82                  | 0.66 | 1.01 | 0.026942 |
| TNF       | rs1799964   | T/C                                 | 6   | 0.27            | 3938                              | All    | Other SM          | 0.27         | 431                             | H  | 0.85       | 0.69 | 1.05 | 0.1238 | 0.84                  | 0.68 | 1.04 | 0.1314   |
| TNF       | rs1800629   | G/A                                 | 6   | 0.09            | 3940                              | All    | Other SM          | 0.08         | 433                             | A  | 0.80       | 0.61 | 1.04 | 0.0862 | 0.78                  | 0.59 | 1.03 | 0.10066  |
| TNF       | rs1800750   | G/A                                 | 6   | 0.05            | 3868                              | All    | Other SM          | 0.05         | 232                             | H  | 0.86       | 0.53 | 1.40 | 0.5408 | 0.74                  | 0.44 | 1.24 | 0.4297   |
| TNF       | rs3093662   | A/G                                 | 6   | 0.11            | 3936                              | All    | Other SM          | 0.11         | 431                             | A  | 0.94       | 0.75 | 1.19 | 0.6219 | 0.94                  | 0.75 | 1.19 | 0.62045  |
| TNF       | rs361525    | G/A                                 | 6   | 0.07            | 3948                              | All    | Other SM          | 0.06         | 432                             | H  | 0.87       | 0.63 | 1.19 | 0.3623 | 0.82                  | 0.60 | 1.14 | 0.3187   |
| CD36      | rs3211938   | T/G                                 | 7   | 0.10            | 3942                              | All    | Other SM          | 0.11         | 435                             | A  | 1.19       | 0.95 | 1.49 | 0.1294 | 1.24                  | 0.99 | 1.56 | 0.13664  |
| NOD1      | rs2075820   | G/A                                 | 7   | 0.38            | 3941                              | All    | Other SM          |              |                                 |    |            |      |      |        |                       |      |      |          |



|                |                             |     |    |      |      |     |          |      |     |    |      |      |      |        |      |      |      |          |
|----------------|-----------------------------|-----|----|------|------|-----|----------|------|-----|----|------|------|------|--------|------|------|------|----------|
| <i>RRM1</i>    | rs116472045                 | A/G | 11 | 0.02 | 3939 | All | Other SM | 0.02 | 431 | H  | 1.21 | 0.70 | 2.10 | 0.5093 | 1.22 | 0.70 | 2.13 | 0.47035  |
| <i>RTN3</i>    | rs542998                    | T/C | 11 | 0.43 | 3929 | All | Other SM | 0.47 | 375 | D  | 1.28 | 1.01 | 1.62 | 0.0402 | 1.31 | 1.02 | 1.67 | 0.0343   |
| <i>TRIM5</i>   | rs7935564                   | G/A | 11 | 0.44 | 3871 | All | Other SM | 0.46 | 378 | R  | 1.21 | 0.93 | 1.56 | 0.1638 | 1.08 | 0.83 | 1.41 | 0.15605  |
| <i>CAND1</i>   | rs10459266                  | C/A | 12 | 0.21 | 3938 | All | Other SM | 0.23 | 432 | D  | 1.16 | 0.94 | 1.42 | 0.1658 | 1.17 | 0.95 | 1.45 | 0.1441   |
| <i>CAND1</i>   | rs12307123                  | C/T | 12 | 0.23 | 3933 | All | Other SM | 0.22 | 432 | H  | 0.99 | 0.80 | 1.22 | 0.9170 | 1.00 | 0.84 | 1.19 | 0.8852   |
| <i>CAND1</i>   | rs1566830                   | G/T | 12 | 0.26 | 3940 | All | Other SM | 0.26 | 431 | R  | 1.14 | 0.77 | 1.68 | 0.5241 | 1.14 | 0.76 | 1.69 | 0.4937   |
| <i>GRIP1</i>   | rs1394263                   | T/C | 12 | 0.26 | 3914 | All | Other SM | 0.26 | 428 | R  | 1.18 | 0.80 | 1.73 | 0.4130 | 1.17 | 0.79 | 1.73 | 0.38613  |
| <i>IL22</i>    | rs1012356                   | A/T | 12 | 0.49 | 3940 | All | Other SM | 0.48 | 433 | H  | 1.16 | 0.95 | 1.42 | 0.1362 | 1.17 | 0.95 | 1.44 | 0.0929   |
| <i>IL22</i>    | rs2227478                   | A/G | 12 | 0.38 | 3939 | All | Other SM | 0.40 | 433 | H  | 0.86 | 0.70 | 1.05 | 0.1377 | 0.90 | 0.73 | 1.11 | 0.17122  |
| <i>IL22</i>    | rs2227485                   | G/A | 12 | 0.42 | 3928 | All | Other SM | 0.41 | 432 | R  | 0.88 | 0.67 | 1.15 | 0.3423 | 0.84 | 0.64 | 1.12 | 0.3101   |
| <i>IL22</i>    | rs2227491                   | C/T | 12 | 0.40 | 3870 | All | Other SM | 0.43 | 429 | D  | 1.24 | 1.00 | 1.54 | 0.0520 | 1.24 | 0.99 | 1.56 | 0.035985 |
| <i>IL22</i>    | rs2227507                   | T/C | 12 | 0.04 | 3948 | All | Other SM | 0.04 | 435 | R  | 0.91 | 0.11 | 7.33 | 0.9290 | 0.80 | 0.10 | 6.56 | 0.9341   |
| <i>TPTE2</i>   | rs182873742                 | C/G | 13 | 0.00 | 3940 | All | Other SM | 0.00 | 427 | H  | -    | -    | -    | -      | -    | -    | -    | -        |
| <i>RPS6K1</i>  | rs3742785                   | C/A | 14 | 0.29 | 3714 | All | Other SM | 0.30 | 406 | H  | 1.21 | 0.98 | 1.49 | 0.0746 | 1.14 | 0.92 | 1.42 | 0.1143   |
| <i>SPTB</i>    | rs229587                    | T/C | 14 | 0.34 | 3872 | All | Other SM | 0.37 | 422 | R  | 1.36 | 1.02 | 1.81 | 0.0398 | 1.34 | 1.00 | 1.80 | 0.043333 |
| <i>YLP1</i>    | rs10139016                  | C/T | 14 | 0.25 | 3937 | All | Other SM | 0.26 | 431 | R  | 1.15 | 0.78 | 1.69 | 0.4848 | 1.10 | 0.74 | 1.64 | 0.4388   |
| <i>ADCY9</i>   | rs10775349                  | C/G | 16 | 0.20 | 3941 | All | Other SM | 0.20 | 379 | H  | 0.89 | 0.71 | 1.12 | 0.3107 | 0.87 | 0.68 | 1.10 | 0.30031  |
| <i>ADCY9</i>   | rs2230739                   | A/G | 16 | 0.09 | 3944 | All | Other SM | 0.07 | 380 | H  | 0.72 | 0.52 | 1.00 | 0.0407 | 0.69 | 0.50 | 0.97 | 0.0431   |
| <i>HBA</i>     | $\alpha^{37}$ -thalassaemia | ID  | 16 | 0.41 | 3946 | All | Other SM | 0.37 | 421 | D  | 0.80 | 0.65 | 0.98 | 0.0322 | 0.80 | 0.64 | 0.98 | 0.042911 |
| <i>IL4</i>     | rs2243250                   | T/C | 16 | 0.20 | 3902 | All | Other SM | 0.21 | 428 | R  | 1.12 | 0.70 | 1.79 | 0.6423 | 1.03 | 0.86 | 1.23 | 0.7517   |
| <i>IL4R</i>    | rs1805015                   | T/C | 16 | 0.42 | 3927 | All | Other SM | 0.42 | 434 | A  | 0.96 | 0.84 | 1.11 | 0.6062 | 0.99 | 0.86 | 1.15 | 0.71347  |
| <i>ADORA2B</i> | rs2535611                   | T/C | 17 | 0.10 | 3911 | All | Other SM | 0.11 | 380 | R  | 1.76 | 0.82 | 3.80 | 0.1753 | 1.76 | 0.81 | 3.84 | 0.1728   |
| <i>NOS2</i>    | rs1800482                   | G/C | 17 | 0.08 | 3922 | All | Other SM | 0.08 | 432 | R  | 0.36 | 0.05 | 2.66 | 0.2383 | 0.31 | 0.04 | 2.40 | 0.24072  |
| <i>NOS2</i>    | rs2297518                   | G/A | 17 | 0.14 | 3910 | All | Other SM | 0.14 | 377 | A  | 1.02 | 0.82 | 1.26 | 0.8720 | 1.04 | 0.84 | 1.30 | 0.8338   |
| <i>NOS2</i>    | rs8078340                   | C/T | 17 | 0.21 | 3948 | All | Other SM | 0.23 | 435 | R  | 1.37 | 0.88 | 2.13 | 0.1832 | 1.28 | 0.82 | 2.02 | 0.17457  |
| <i>NOS2</i>    | rs9282799                   | C/T | 17 | 0.03 | 3949 | All | Other SM | 0.02 | 432 | R  | -    | -    | -    | -      | -    | -    | -    | -        |
| <i>TBX2</i>    | rs73991577                  | A/G | 17 | 0.00 | 3937 | All | Other SM | 0.00 | 430 | R  | -    | -    | -    | -      | -    | -    | -    | -        |
| <i>EMR1</i>    | rs373533                    | G/T | 19 | 0.46 | 3863 | All | Other SM | 0.51 | 379 | R  | 1.31 | 1.03 | 1.67 | 0.0303 | 1.32 | 1.03 | 1.68 | 0.0260   |
| <i>EMR1</i>    | rs461645                    | C/T | 19 | 0.47 | 3933 | All | Other SM | 0.52 | 380 | R  | 1.33 | 1.05 | 1.69 | 0.0194 | 1.33 | 1.04 | 1.70 | 0.016471 |
| <i>ICAM</i>    | rs5498                      | A/G | 19 | 0.11 | 3908 | All | Other SM | 0.12 | 427 | R  | 1.12 | 0.53 | 2.38 | 0.7671 | 1.10 | 0.51 | 2.36 | 0.7497   |
| <i>GNAS</i>    | rs8386                      | C/T | 20 | 0.19 | 3944 | All | Other SM | 0.16 | 434 | A  | 0.84 | 0.70 | 1.02 | 0.0755 | 0.84 | 0.69 | 1.02 | 0.057606 |
| <i>DERL3</i>   | rs1128127                   | G/A | 22 | 0.50 | 3911 | All | Other SM | 0.48 | 434 | D  | 0.95 | 0.76 | 1.18 | 0.6360 | 0.98 | 0.78 | 1.23 | 0.6265   |
| <i>CD40LG</i>  | rs1126535                   | T/C | X  | 0.15 | 3934 | M+F | Other SM | 0.15 | 434 | H  | 0.95 | 0.68 | 1.31 | 0.7387 | 0.91 | 0.65 | 1.28 | 0.69642  |
| <i>CD40LG</i>  | rs1126535                   | T/C | X  | 0.16 | 1947 | F   | Other SM | 0.14 | 209 | R  | 0.35 | 0.09 | 1.47 | 0.0942 | 0.37 | 0.10 | 1.48 | 0.0952   |
| <i>CD40LG</i>  | rs1126535                   | C/T | X  | 0.85 | 1987 | M   | Other SM | 0.83 | 225 | HM | 0.87 | 0.60 | 1.26 | 0.4637 | 0.89 | 0.61 | 1.28 | 0.4837   |
| <i>CD40LG</i>  | rs3092945                   | T/C | X  | 0.21 | 3927 | M+F | Other SM | 0.26 | 434 | D  | 1.30 | 1.05 | 1.61 | 0.0165 | 1.25 | 1.00 | 1.56 | 0.0183   |
| <i>CD40LG</i>  | rs3092945                   | T/C | X  | 0.21 | 1942 | F   | Other SM | 0.26 | 210 | D  | 1.35 | 1.01 | 1.80 | 0.0431 | 1.36 | 1.03 | 1.81 | 0.0451   |
| <i>CD40LG</i>  | rs3092945                   | C/T | X  | 0.78 | 1985 | M   | Other SM | 0.73 | 224 | HM | 0.80 | 0.59 | 1.10 | 0.1835 | 0.81 | 0.60 | 1.15 | 0.2135   |
| <i>G6PD</i>    | rs1050828                   | C/T | X  | 0.19 | 3940 | M+F | Other SM | 0.19 | 431 | H  | 0.75 | 0.55 | 1.04 | 0.0826 | 0.73 | 0.52 | 1.02 | 0.082567 |
| <i>G6PD</i>    | rs1050828                   | C/T | X  | 0.20 | 1951 | F   | Other SM | 0.17 | 207 | H  | 0.75 | 0.55 | 1.04 | 0.0827 | 0.76 | 0.56 | 1.06 | 0.0927   |
| <i>G6PD</i>    | rs1050828                   | C/T | X  | 0.19 | 1989 | M   | Other SM | 0.20 | 224 | HM | 1.07 | 0.76 | 1.52 | 0.6975 | 1.09 | 0.78 | 1.55 | 0.7075   |
| <i>G6PD</i>    | rs1050829                   | T/C | X  | 0.40 | 3928 | M+F | Other SM | 0.41 | 433 | H  | 0.75 | 0.56 | 1.01 | 0.0561 | 0.83 | 0.61 | 1.12 | 0.0876   |
| <i>G6PD</i>    | rs1050829                   | T/C | X  | 0.41 | 1952 | F   | Other SM | 0.41 | 208 | H  | 0.75 | 0.56 | 1.01 | 0.0555 | 0.76 | 0.57 | 1.02 | 0.0655   |
| <i>G6PD</i>    | rs1050829                   | C/T | X  | 0.60 | 1976 | M   | Other SM | 0.59 | 225 | HM | 0.94 | 0.71 | 1.24 | 0.6541 | 0.95 | 0.73 | 1.25 | 0.6741   |

\* The rs8176719 polymorphism identifies blood-group O in the homozygous deletion form. The derived allele of rs8176746 identifies blood-group B. Chr = chromosome; DAF = derived allele frequency; MO = genotype model [A – additive, D – dominant, H – heterozygote, HM – hemizygous males, R – recessive] with respect to the derived allele; OR = Odds Ratio; LCI = Lower Confidence Interval (95%); UCI = Upper Confidence Interval; P = p-value using a logistic regression model as described in methods. § ORs and p-values unadjusted and adjusted for ethnic group, gender and rs334 genotype. Other SM includes those individuals who did not have CM, SMA or RD.

**Table S7: Odds ratios for other SM for all polymorphisms investigated.**

| Gene                       | SNPID                          | Genotype  | SM               |                        | CM               |                        | SMA              |                        | RD               |                        | Death            |                       |
|----------------------------|--------------------------------|-----------|------------------|------------------------|------------------|------------------------|------------------|------------------------|------------------|------------------------|------------------|-----------------------|
|                            |                                |           | OR (95% CI)      | P <sup>†</sup>         | OR (95% CI)      | P <sup>†</sup>         | OR (95% CI)      | P <sup>†</sup>         | OR (95% CI)      | P <sup>†</sup>         | OR (95% CI)      | P <sup>†</sup>        |
| <i>ATP2B4</i>              | rs1541255                      | norm (AA) | 1                |                        | 1                |                        | 1                |                        | 1                |                        | 1                |                       |
|                            |                                | het (AG)  | 0.98 (0.88-1.10) | 0.8                    | 0.91 (0.80-1.05) | 0.22                   | 0.89 (0.75-1.06) | 0.22                   | 0.94 (0.79-1.12) | 0.53                   | 0.97 (0.74-1.26) | 0.83                  |
|                            |                                | hom (GG)  | 0.73 (0.60-0.89) | 0.001                  | 0.65 (0.51-0.83) | 0.0007                 | 0.60 (0.44-0.83) | 0.002                  | 0.61 (0.44-0.84) | 0.002                  | 0.79 (0.49-1.25) | 0.32                  |
| <i>IL10</i>                | rs1800890                      | norm (AA) | 1                |                        | 1                |                        | 1                |                        | 1                |                        | 1                |                       |
|                            |                                | het (AT)  | 1.03 (0.92-1.15) | 0.59                   | 1.01 (0.88-1.15) | 0.82                   | 1.06 (0.89-1.26) | 0.45                   | 1.03 (0.86-1.22) | 0.71                   | 0.90 (0.69-1.19) | 0.48                  |
|                            |                                | hom (TT)  | 0.70 (0.55-0.89) | 0.004                  | 0.74 (0.54-1.00) | 0.05                   | 0.85 (0.59-1.23) | 0.4                    | 0.76 (0.52-1.11) | 0.15                   | 0.93 (0.53-1.58) | 0.79                  |
| <i>LPHN2</i>               | rs72933304                     | norm (CC) | 1                |                        | 1                |                        | 1                |                        | 1                |                        | 1                |                       |
|                            |                                | het (AC)  | 0.82 (0.70-0.95) | 0.01                   | 0.84 (0.69-1.01) | 0.07                   | 0.86 (0.68-1.09) | 0.23                   | 0.84 (0.66-1.06) | 0.15                   | 0.79 (0.55-1.15) | 0.23                  |
|                            |                                | hom (AA)  | 0.46 (0.20-1.02) | 0.05                   | 0.51 (0.19-1.35) | 0.18                   | 0.58 (0.17-1.96) | 0.38                   | 0.58 (0.17-1.94) | 0.38                   | -                | -                     |
| <i>LOC727982</i>           | rs1371478                      | norm (CC) | 1                |                        | 1                |                        | 1                |                        | 1                |                        | 1                |                       |
|                            |                                | het (CT)  | 1.30 (1.16-1.49) | 2.70×10 <sup>-6</sup>  | 1.31 (1.14-1.50) | 9.41×10 <sup>-5</sup>  | 1.34 (1.12-1.59) | 0.0008                 | 1.37 (1.15-1.62) | 0.0002                 | 1.37 (1.05-1.78) | 0.01                  |
|                            |                                | hom (TT)  | 1.02 (0.83-1.26) | 0.78                   | 0.96 (0.74-1.25) | 0.79                   | 1.16 (0.85-1.59) | 0.35                   | 0.89 (0.63-1.26) | 0.53                   | 1.12 (0.69-1.81) | 0.62                  |
| <i>ARL14</i>               | rs75731597                     | norm (AA) | 1                |                        | 1                |                        | 1                |                        | 1                |                        | 1                |                       |
|                            |                                | het (AC)  | 1.26 (1.09-1.46) | 0.001                  | 1.25 (1.04-1.49) | 0.01                   | 1.25 (1.02-1.59) | 0.03                   | 1.22 (0.98-1.53) | 0.06                   | 1.55 (1.13-2.14) | 0.006                 |
|                            |                                | hom (CC)  | 0.80 (0.45-1.43) | 0.46                   | 0.73 (0.35-1.55) | 0.43                   | 1.07 (0.47-2.44) | 0.86                   | 0.73 (0.28-1.88) | 0.52                   | 1.23 (0.37-4.07) | 0.72                  |
| <i>FREM3</i>               | rs186873296                    | norm (AA) | 1                |                        | 1                |                        | 1                |                        | 1                |                        | 1                |                       |
|                            |                                | het (AG)  | 0.57 (0.49-0.68) | 3.22×10 <sup>-11</sup> | 0.62 (0.50-0.75) | 1.68×10 <sup>-6</sup>  | 0.56 (0.43-0.73) | 2.67×10 <sup>-5</sup>  | 0.54 (0.41-0.70) | 5.76×10 <sup>-6</sup>  | 0.57 (0.38-0.86) | 0.007                 |
|                            |                                | hom (GG)  | 0.26 (0.11-0.62) | 0.002                  | 0.15 (0.03-0.64) | 0.01                   | 0.14 (0.01-1.04) | 0.05                   | 0.40 (0.12-1.32) | 0.13                   | 0.36 (0.04-2.66) | 0.31                  |
| <i>INPP4B</i>              | rs77389579                     | norm (GG) | 1                |                        | 1                |                        | 1                |                        | 1                |                        | 1                |                       |
|                            |                                | het (GT)  | 0.61 (0.51-0.73) | 7.11×10 <sup>-8</sup>  | 0.64 (0.51-0.80) | 0.0001                 | 0.56 (0.41-0.75) | 0.0001                 | 0.61 (0.45-0.81) | 0.0007                 | 0.51 (0.32-0.83) | 0.006                 |
|                            |                                | hom (TT)  | 0.25 (0.05-1.12) | 0.07                   | 0.22 (0.02-1.70) | 0.14                   | 0.41 (0.05-3.14) | 0.39                   | -                | -                      | -                | -                     |
| <i>ABO</i>                 | rs876719*                      | non-O     | 1                |                        | 1                |                        | 1                |                        | 1                |                        | 1                |                       |
|                            |                                | O         | 0.74 (0.66-0.82) | 3.09×10 <sup>-8</sup>  | 0.78 (0.69-0.89) | 0.0003                 | 0.67 (0.57-0.80) | 4.13×10 <sup>-6</sup>  | 0.71 (0.60-0.83) | 4.61×10 <sup>-5</sup>  | 0.67 (0.52-0.87) | 0.002                 |
| <i>ABO</i>                 | rs8176746*                     | norm (CC) | 1                |                        | 1                |                        | 1                |                        | 1                |                        | 1                |                       |
|                            |                                | het (AC)  | 1.35 (1.19-1.52) | 9.85×10 <sup>-7</sup>  | 1.19 (1.03-1.39) | 0.01                   | 1.14 (1.17-1.70) | 0.0002                 | 1.24 (1.03-1.50) | 0.02                   | 1.26 (0.94-1.68) | 0.11                  |
|                            |                                | hom (AA)  | 1.79 (1.29-2.49) | 0.0004                 | 1.46 (0.97-2.20) | 0.06                   | 2.13 (1.35-3.36) | 0.001                  | 2.37 (1.53-3.65) | 9.01×10 <sup>-5</sup>  | 1.61 (0.76-3.41) | 0.20                  |
| <i>HBB</i>                 | rs334                          | norm (AA) | 1                |                        | 1                |                        | 1                |                        | 1                |                        | 1                |                       |
|                            |                                | het (AT)  | 0.15 (0.11-0.20) | 2.98×10 <sup>-39</sup> | 0.14 (0.09-0.21) | 2.01×10 <sup>-23</sup> | 0.07 (0.04-0.15) | 5.28×10 <sup>-14</sup> | 0.11 (0.06-0.19) | 1.58×10 <sup>-14</sup> | 0.26 (0.14-0.48) | 2.07×10 <sup>-5</sup> |
|                            |                                | hom (TT)  | 0.57 (0.28-1.14) | 0.11                   | 0.77 (0.35-1.69) | 0.51                   | 1.32 (0.60-2.90) | 0.48                   | 1.14 (0.50-2.61) | 0.74                   | 1.31 (0.39-4.33) | 0.65                  |
| <i>RPS6K1</i>              | rs3742785                      | norm (CC) | 1                |                        | 1                |                        | 1                |                        | 1                |                        | 1                |                       |
|                            |                                | het (AC)  | 1.20 (1.07-1.34) | 0.001                  | 1.16 (1.01-1.34) | 0.03                   | 1.37 (1.15-1.64) | 0.0004                 | 1.04 (0.87-1.24) | 0.62                   | 0.94 (0.71-1.23) | 0.66                  |
|                            |                                | hom (AA)  | 0.99 (0.81-1.20) | 0.93                   | 0.88 (0.69-1.14) | 0.35                   | 1.20 (0.89-1.61) | 0.2                    | 0.86 (0.63-1.18) | 0.37                   | 0.70 (0.42-1.17) | 0.18                  |
| <i>HBA</i>                 | α <sup>3.7</sup> -thalassaemia | norm      | 1                |                        | 1                |                        | 1                |                        | 1                |                        | 1                |                       |
|                            |                                | het       | 0.83 (0.70-0.93) | 0.002                  | 0.89 (0.77-1.02) | 0.11                   | 0.75 (0.63-0.90) | 0.002                  | 0.79 (0.66-0.94) | 0.01                   | 0.74 (0.56-0.97) | 0.03                  |
|                            |                                | hom       | 0.66 (0.55-0.78) | 1.70×10 <sup>-6</sup>  | 0.65 (0.52-0.80) | 9.68×10 <sup>-5</sup>  | 0.50 (0.38-0.67) | 4.12×10 <sup>-6</sup>  | 0.61 (0.47-0.81) | 0.0004                 | 0.46 (0.29-0.73) | 0.0009                |
| <i>CD40LG</i> <sup>§</sup> | rs3092945                      | norm (TT) | 1                |                        | 1                |                        | 1                |                        | 1                |                        | 1                |                       |
|                            |                                | het (CT)  | 1.12 (0.95-1.13) | 0.14                   | 0.98 (0.81-1.20) | 0.92                   | 1.18 (0.92-1.51) | 0.16                   | 1.28 (1.00-1.64) | 0.04                   | 1.30 (0.88-1.92) | 0.18                  |
|                            |                                | hom (CC)  | 1.31 (1.13-1.53) | 0.0003                 | 1.32 (1.09-1.59) | 0.003                  | 1.37 (1.09-1.72) | 0.006                  | 1.07 (0.84-1.37) | 0.55                   | 1.00 (0.68-1.46) | 0.98                  |
| <i>G6PD</i> <sup>§</sup>   | rs1050828                      | norm (CC) | 1                |                        | 1                |                        | 1                |                        | 1                |                        | 1                |                       |
|                            |                                | het (CT)  | 0.82 (0.69-0.96) | 0.01                   | 0.79 (0.64-0.97) | 0.02                   | 0.80 (0.61-1.04) | 0.1                    | 0.88 (0.68-1.13) | 0.33                   | 0.60 (0.38-0.94) | 0.02                  |
|                            |                                | hom (TT)  | 1.10 (0.93-1.30) | 0.25                   | 0.94 (0.76-1.17) | 0.63                   | 1.58 (1.24-2.00) | 0.0001                 | 0.92 (0.70-1.21) | 0.58                   | 0.69 (0.44-1.09) | 0.11                  |

\* The rs8176719 polymorphism identifies blood-group O in the homozygous deletion form. The derived allele of rs8176746 identifies blood-group B. †Analyses are adjusted for ethnic group, gender and rs334 genotype. Chr: chromosome; MAF; minor allele frequency; OR: Odds Ratio (95% Confidence Interval); P: p-value. Individuals with multiple phenotypes were included in each of those groups for analysis. §Hemizygous males are coded as homozygotes.

**Table S8: Tests of association by specific genotypes for the most significant loci in the case-control study.**

| Gene      | SNPID       | Alleles<br>(ancestral/<br>derived) | Chr | DAF<br>Controls | No. of<br>genotype<br>in controls | Sample | Case<br>Phenotype | DAF<br>Cases | No. of<br>genotypes<br>in cases | MO | Unadjusted |      |       |                       | Adjusted <sup>s</sup> |      |       |                       |
|-----------|-------------|------------------------------------|-----|-----------------|-----------------------------------|--------|-------------------|--------------|---------------------------------|----|------------|------|-------|-----------------------|-----------------------|------|-------|-----------------------|
|           |             |                                    |     |                 |                                   |        |                   |              |                                 |    | OR         | LCL  | UCL   | P                     | OR                    | LCL  | UCL   | P                     |
| AJAP1     | rs113788643 | A/G                                | 1   | 0.08            | 3940                              | All    | CM only           | 0.08         | 670                             | R  | 1.43       | 0.58 | 3.51  | 0.4556                | 1.55                  | 0.61 | 3.94  | 0.3815                |
| AJAP1     | rs6674631   | G/A                                | 1   | 0.13            | 3928                              | All    | CM only           | 0.11         | 666                             | R  | 0.49       | 0.23 | 1.08  | 0.0535                | 0.55                  | 0.25 | 1.22  | 0.0571                |
| ATP2B4    | rs10900585  | G/T                                | 1   | 0.34            | 3762                              | All    | CM only           | 0.34         | 666                             | R  | 1.20       | 0.90 | 1.60  | 0.2112                | 1.06                  | 0.70 | 1.59  | 0.1700                |
| ATP2B4    | rs1541255   | A/G                                | 1   | 0.33            | 3933                              | All    | CM only           | 0.32         | 665                             | R  | 0.80       | 0.60 | 1.06  | 0.1141                | 0.81                  | 0.60 | 1.09  | 0.0951                |
| ATP2B4    | rs3753036   | G/A                                | 1   | 0.04            | 3939                              | All    | CM only           | 0.05         | 668                             | R  | 2.46       | 0.46 | 13.03 | 0.3241                | 1.08                  | 0.80 | 1.46  | 0.6336                |
| ATP2B4    | rs4951074   | G/A                                | 1   | 0.32            | 3934                              | All    | CM only           | 0.31         | 669                             | R  | 0.87       | 0.65 | 1.17  | 0.3565                | 1.12                  | 0.62 | 2.03  | 0.33082               |
| ATP2B4    | rs55868763  | G/C                                | 1   | 0.33            | 3931                              | All    | CM only           | 0.32         | 667                             | R  | 0.80       | 0.60 | 1.07  | 0.1275                | 0.82                  | 0.60 | 1.12  | 0.1091                |
| CR1       | rs17047660  | A/G                                | 1   | 0.16            | 3923                              | All    | CM only           | 0.19         | 659                             | A  | 1.18       | 1.01 | 1.37  | 0.0431                | 1.17                  | 0.99 | 1.37  | 0.051                 |
| CR1       | rs17047661  | G/A                                | 1   | 0.32            | 3934                              | All    | CM only           | 0.34         | 655                             | A  | 1.09       | 0.96 | 1.24  | 0.1812                | 1.18                  | 0.89 | 1.57  | 0.1841                |
| DARC      | rs2814778   | G/A                                | 1   | 0.00            | 3944                              | All    | CM only           | 0.00         | 583                             | H  | 0.71       | 0.16 | 3.19  | 0.6403                | 0.67                  | 0.15 | 3.04  | 0.63892               |
| GBP7      | rs1803632   | G/C                                | 1   | 0.49            | 3942                              | All    | CM only           | 0.50         | 662                             | H  | 1.03       | 0.87 | 1.22  | 0.7072                | 1.05                  | 0.86 | 1.28  | 0.6713                |
| IL10      | rs1800890   | A/T                                | 1   | 0.24            | 3945                              | All    | CM only           | 0.22         | 662                             | R  | 0.66       | 0.44 | 0.99  | 0.0372                | 0.66                  | 0.43 | 1.00  | 0.0369                |
| IL10      | rs1800896   | T/C                                | 1   | 0.38            | 3943                              | All    | CM only           | 0.37         | 660                             | H  | 1.11       | 0.94 | 1.31  | 0.2197                | 1.10                  | 0.93 | 1.31  | 0.2420                |
| IL10      | rs3024500   | G/A                                | 1   | 0.45            | 3928                              | All    | CM only           | 0.48         | 661                             | R  | 1.16       | 0.95 | 1.41  | 0.1518                | 1.16                  | 0.94 | 1.42  | 0.17422               |
| LPHN2     | rs146428334 | A/G                                | 1   | 0.00            | 3930                              | All    | CM only           | 0.01         | 669                             | H  | 1.76       | 0.83 | 3.75  | 0.1603                | 1.87                  | 0.87 | 4.02  | 0.1530                |
| LPHN2     | rs4650365   | T/C                                | 1   | 0.20            | 3936                              | All    | CM only           | 0.19         | 666                             | H  | 0.79       | 0.66 | 0.95  | 0.0107                | 0.79                  | 0.65 | 0.95  | 0.00521               |
| LPHN2     | rs72933304  | C/A                                | 1   | 0.09            | 3942                              | All    | CM only           | 0.07         | 669                             | R  | 0.19       | 0.03 | 1.41  | 0.0339                | 0.20                  | 0.03 | 1.47  | 0.0350                |
| LPHN2     | rs72933310  | T/C                                | 1   | 0.09            | 3927                              | All    | CM only           | 0.08         | 669                             | A  | 0.87       | 0.70 | 1.07  | 0.1792                | 0.90                  | 0.72 | 1.12  | 0.18514               |
| LPHN2     | rs72933350  | T/C                                | 1   | 0.05            | 3940                              | All    | CM only           | 0.04         | 669                             | A  | 0.74       | 0.55 | 1.00  | 0.0447                | 0.79                  | 0.58 | 1.08  | 0.0529                |
| IL1A      | rs17561     | G/T                                | 2   | 0.16            | 3938                              | All    | CM only           | 0.18         | 661                             | R  | 1.32       | 0.82 | 2.12  | 0.2705                | 1.41                  | 0.86 | 2.31  | 0.2744                |
| IL1B      | rs1143634   | C/T                                | 2   | 0.11            | 3941                              | All    | CM only           | 0.13         | 660                             | R  | 1.25       | 0.64 | 2.44  | 0.5140                | 1.40                  | 0.71 | 2.77  | 0.5136                |
| LAPTM4A   | rs973128    | C/G                                | 2   | 0.44            | 3885                              | All    | CM only           | 0.44         | 661                             | D  | 0.99       | 0.82 | 1.18  | 0.8719                | 0.93                  | 0.78 | 1.11  | 0.7362                |
| LOC727982 | rs10188961  | A/G                                | 2   | 0.40            | 3934                              | All    | CM only           | 0.40         | 667                             | D  | 1.09       | 0.92 | 1.30  | 0.3197                | 1.13                  | 0.94 | 1.35  | 0.3328                |
| LOC727982 | rs1371474   | T/C                                | 2   | 0.27            | 3933                              | All    | CM only           | 0.29         | 669                             | H  | 1.29       | 1.09 | 1.53  | 0.0031                | 1.33                  | 1.12 | 1.58  | 0.0045                |
| LOC727982 | rs1371478   | C/T                                | 2   | 0.27            | 3909                              | All    | CM only           | 0.29         | 668                             | H  | 1.30       | 1.10 | 1.54  | 0.0022                | 1.34                  | 1.13 | 1.60  | 0.0033                |
| SDC1      | rs11899121  | C/G                                | 2   | 0.47            | 3921                              | All    | CM only           | 0.49         | 666                             | D  | 1.15       | 0.95 | 1.39  | 0.1534                | 1.15                  | 0.95 | 1.40  | 0.17548               |
| ZSWIM2    | rs144778284 | C/T                                | 2   | 0.00            | 3937                              | All    | CM only           | 0.00         | 669                             | H  | 0.21       | 0.03 | 1.56  | 0.0507                | 0.23                  | 0.03 | 1.73  | 0.0518                |
| ZSWIM2    | rs4316902   | A/G                                | 2   | 0.18            | 3910                              | All    | CM only           | 0.18         | 667                             | H  | 1.04       | 0.87 | 1.25  | 0.6799                | 1.07                  | 0.89 | 1.29  | 0.65552               |
| ARL14     | rs74954675  | A/C                                | 3   | 0.08            | 3907                              | All    | CM only           | 0.10         | 662                             | H  | 1.32       | 1.06 | 1.64  | 0.0147                | 1.37                  | 1.10 | 1.72  | 0.0109                |
| ARL14     | rs75731597  | A/C                                | 3   | 0.08            | 3491                              | All    | CM only           | 0.11         | 657                             | H  | 1.34       | 1.08 | 1.66  | 0.0101                | 1.39                  | 1.11 | 1.74  | 0.01012               |
| ARL14     | rs76033371  | A/G                                | 3   | 0.09            | 3939                              | All    | CM only           | 0.11         | 665                             | H  | 1.25       | 1.01 | 1.55  | 0.0412                | 1.30                  | 1.04 | 1.62  | 0.0377                |
| B3GALNT1  | rs12107243  | G/C                                | 3   | 0.49            | 3934                              | All    | CM only           | 0.49         | 668                             | D  | 0.94       | 0.77 | 1.13  | 0.4921                | 0.98                  | 0.86 | 1.11  | 0.49661               |
| ILI7RD    | rs6780995   | A/G                                | 3   | 0.41            | 3939                              | All    | CM only           | 0.39         | 660                             | A  | 0.92       | 0.82 | 1.04  | 0.1948                | 0.92                  | 0.82 | 1.04  | 0.2194                |
| ILI7RE    | rs708567    | A/G                                | 3   | 0.50            | 3881                              | All    | CM only           | 0.49         | 660                             | H  | 0.98       | 0.83 | 1.16  | 0.8002                | 0.96                  | 0.81 | 1.14  | 0.75464               |
| TLR9      | rs187084    | T/C                                | 3   | 0.33            | 3933                              | All    | CM only           | 0.31         | 584                             | A  | 0.90       | 0.79 | 1.02  | 0.1075                | 0.86                  | 0.75 | 0.99  | 0.1035                |
| FREM3     | rs149914432 | A/C                                | 4   | 0.10            | 3915                              | All    | CM only           | 0.05         | 661                             | A  | 0.53       | 0.41 | 0.68  | 7.7x10 <sup>-08</sup> | 0.54                  | 0.43 | 0.70  | 9.7x10 <sup>-08</sup> |
| FREM3     | rs184895969 | C/T                                | 4   | 0.00            | 3940                              | All    | CM only           | 0.00         | 669                             | H  | 0.66       | 0.23 | 1.89  | 0.4161                | 0.83                  | 0.25 | 2.70  | 0.4234                |
| FREM3     | rs184908374 | G/A                                | 4   | 0.00            | 3943                              | All    | CM only           | 0.00         | 669                             | H  | 0.82       | 0.28 | 2.36  | 0.7000                | 1.02                  | 0.31 | 3.39  | 0.71109               |
| FREM3     | rs186790584 | A/T                                | 4   | 0.10            | 3941                              | All    | CM only           | 0.05         | 668                             | A  | 0.52       | 0.41 | 0.67  | 6.1x10 <sup>-08</sup> | 0.59                  | 0.45 | 0.8   | 7.0x10 <sup>-08</sup> |
| FREM3     | rs186873296 | A/G                                | 4   | 0.10            | 3926                              | All    | CM only           | 0.05         | 667                             | A  | 0.51       | 0.39 | 0.66  | 2.6x10 <sup>-08</sup> | 0.52                  | 0.41 | 0.67  | 3.8x10 <sup>-08</sup> |
| GAB1      | rs7663712   | A/G                                | 4   | 0.02            | 3938                              | All    | CM only           | 0.03         | 668                             | R  | -          | -    | -     | -                     | -                     | -    | -     | -                     |
| INPP4B    | rs13103597  | C/T                                | 4   | 0.27            | 3925                              | All    | CM only           | 0.22         | 668                             | A  | 0.76       | 0.66 | 0.88  | 0.0001                | 0.81                  | 0.69 | 0.96  | 0.00016               |
| INPP4B    | rs77389579  | G/T                                | 4   | 0.07            | 3937                              | All    | CM only           | 0.05         | 663                             | A  | 0.63       | 0.48 | 0.83  | 0.0005                | 0.69                  | 0.52 | 0.9   | 0.0005                |
| TLR1      | rs4833095   | C/T                                | 4   | 0.09            | 3921                              | All    | CM only           | 0.10         | 585                             | R  | 1.43       | 0.62 | 3.29  | 0.4185                | 1.31                  | 0.56 | 3.08  | 0.41949               |
| TLR6      | rs5743809   | T/C                                | 4   | 0.06            | 3884                              | All    | CM only           | 0.06         | 558                             | R  | 0.46       | 0.06 | 3.51  | 0.3999                | 0.45                  | 0.06 | 3.51  | 0.3992                |
| TLR6      | rs5743810   | C/T                                | 4   | 0.02            | 3936                              | All    | CM only           | 0.01         | 587                             | A  | 0.76       | 0.44 | 1.32  | 0.3147                | 0.61                  | 0.34 | 1.09  | 0.31328               |
| USP38     | rs28459062  | T/C                                | 4   | 0.16            | 3931                              | All    | CM only           | 0.20         | 669                             | A  | 1.26       | 1.09 | 1.47  | 0.0024                | 1.29                  | 1.08 | 1.55  | 0.0029                |
| USP38     | rs4266246   | C/T                                | 4   | 0.22            | 3928                              | All    | CM only           | 0.22         | 667                             | H  | 1.12       | 0.94 | 1.33  | 0.2077                | 1.04                  | 0.87 | 1.25  | 0.18183               |
| C6        | rs1801033   | A/C                                | 5   | 0.47            | 3927                              | All    | CM only           | 0.47         | 584                             | H  | 0.97       | 0.82 | 1.16  | 0.7761                | 1.00                  | 0.83 | 1.19  | 0.7991                |
| IL13      | rs20541     | C/T                                | 5   | 0.22            | 3796                              | All    | CM only           | 0.21         | 557                             | R  | 0.73       | 0.46 | 1.14  | 0.1514                | 0.70                  | 0.44 | 1.11  | 0.17                  |
| IRF       | rs2706384   | C/A                                | 5   | 0.38            | 3819                              | All    | CM only           | 0.36         | 572                             | H  | 0.90       | 0.75 | 1.08  | 0.2449                | 0.90                  | 0.75 | 1.08  | 0.2643                |
| CTLA4     | rs2242665   | A/G                                | 6   | 0.26            | 3853                              | All    | CM only           | 0.26         | 575                             | R  | 0.91       | 0.64 | 1.31  | 0.6257                | 0.84                  | 0.58 | 1.22  | 0.64253               |
| GABBR1    | rs192151845 | G/A                                | 6   | 0.01            | 3943                              | All    | CM only           | 0.01         | 666                             | H  | 1.07       | 0.54 | 2.12  | 0.8487                | 1.12                  | 0.56 | 2.25  | 0.8349                |
| HCG4      | rs114980857 | C/T                                | 6   | 0.21            | 3843                              | All    | CM only           | 0.24         | 667                             | D  | 1.21       | 1.02 | 1.43  | 0.0269                | 1.19                  | 1.00 | 1.42  | 0.026352              |
| HSPA1B    | rs6457452   | C/T                                | 6   | 0.19            | 3917                              | All    | CM only           | 0.18         | 658                             | D  | 0.89       | 0.74 | 1.06  | 0.1928                | 0.89                  | 0.74 | 1.07  | 0.1974                |
| IL20RA    | rs1555498   | C/T                                | 6   | 0.46            | 3947                              | All    | CM only           | 0.48         | 661                             | H  | 1.07       | 0.91 | 1.27  | 0.4116                | 1.09                  | 0.92 | 1.30  | 0.40271               |
| LTA       | rs2239704   | G/T                                | 6   | 0.12            | 3896                              | All    | CM only           | 0.13         | 653                             | H  | 1.09       | 0.89 | 1.33  | 0.3982                | 1.04                  | 0.85 | 1.28  | 0.4347                |
| LTA       | rs909253    | T/C                                | 6   | 0.49            | 3921                              | All    | CM only           | 0.48         | 661                             | H  | 0.90       | 0.76 | 1.06  | 0.2128                | 0.92                  | 0.77 | 1.09  | 0.21919               |
| PLEKHG1   | rs114726617 | G/A                                | 6   | 0.04            | 3940                              | All    | CM only           | 0.04         | 669                             | A  | 1.13       | 0.84 | 1.51  | 0.4271                | 1.17                  | 0.86 | 1.60  | 0.4339                |
| PLEKHG1   | rs141555199 | C/G                                | 6   | 0.02            | 3943                              | All    | CM only           | 0.02         | 669                             | R  | -          | -    | -     | -                     | -                     | -    | -     | -                     |
| PLEKHG1   | rs142712208 | G/A                                | 6   | 0.03            | 3927                              | All    | CM only           | 0.03         | 669                             | D  | 1.10       | 0.78 | 1.54  | 0.5876                | 1.19                  | 0.85 | 1.66  | 0.6292                |
| PLEKHG1   | rs15116938  | C/T                                | 6   | 0.03            | 3939                              | All    | CM only           | 0.03         | 669                             | A  | 1.04       | 0.75 | 1.44  | 0.8199                | 1.13                  | 0.81 | 1.58  | 0.86408               |
| PLEKHG1   | rs151293197 | C/G                                | 6   | 0.03            | 3940                              | All    | CM only           | 0.03         | 669                             | R  | 2.15       | 0.42 | 10.94 | 0.3883                | 2.83                  | 0.53 | 15.15 | 0.3812                |
| PLEKHG1   | rs2131263   | C/T                                | 6   | 0.04            | 3938                              | All    | CM only           | 0.04         | 669                             | A  | 1.13       | 0.84 | 1.51  | 0.4282                | 1.17                  | 0.86 | 1.60  | 0.435                 |
| PLEKHG1   | rs55958968  | A/G                                | 6   | 0.05            | 3932                              | All    | CM only           | 0.05         | 669                             | R  | -          | -    | -     | -                     | -                     | -    | -     | -                     |
| PLEKHG1   | rs76924464  | G/A                                | 6   | 0.03            | 3940                              | All    | CM only           | 0.03         | 669                             | R  | 2.15       | 0.42 | 10.95 | 0.3879                | 2.82                  | 0.53 | 15.09 | 0.38075               |
| PLEKHG1   | rs79100774  | G/C                                | 6   | 0.03            | 3939                              | All    | CM only           | 0.03         | 670                             | R  | 2.15       | 0.42 | 10.94 | 0.3885                | 2.83                  | 0.53 | 15.15 | 0.3813                |
| SNORD48   | rs116288147 | C/T                                | 6   | 0.24            | 3896                              | All    | CM only           | 0.24         | 659                             | H  | 0.96       | 0.81 | 1.14  | 0.6533                | 0.97                  | 0.81 | 1.17  | 0.75804               |
| TNF       | rs1799964   | T/C                                | 6   | 0.27            | 3938                              | All    | CM only           | 0.28         | 654                             | R  | 1.11       | 0.82 | 1.51  | 0.5068                | 1.14                  | 0.83 | 1.57  | 0.5155                |
| TNF       | rs1800629   | G/A                                | 6   | 0.09            | 3940                              | All    | CM only           | 0.08         | 663                             | A  | 0.91       | 0.73 | 1.12  | 0.3730                | 0.91                  | 0.73 | 1.13  | 0.38746               |
| TNF       | rs1800750   | G/A                                | 6   | 0.05            | 3868                              | All    | CM only           | 0.05         | 423                             | R  | 1.08       | 0.25 | 4.70  | 0.9215                | 0.97                  | 0.69 | 1.39  | 0.9179                |
| TNF       | rs3093662   | A/G                                | 6   | 0.11            | 3936                              | All    | CM only           | 0.12         | 659                             | H  | 1.10       | 0.90 | 1.35  | 0.3498                | 1.09                  | 0.89 | 1.35  | 0.38042               |
| TNF       | rs361525    | G/A                                | 6   | 0.07            | 3948                              | All    | CM only           | 0.07         | 658                             | R  | 0.84       | 0.25 | 2.83  | 0.7698                |                       |      |       |                       |

|                |                                |     |    |      |      |     |         |      |     |    |      |      |      |        |      |      |      |          |
|----------------|--------------------------------|-----|----|------|------|-----|---------|------|-----|----|------|------|------|--------|------|------|------|----------|
| <i>TRIM5</i>   | rs7935564                      | G/A | 11 | 0.44 | 3871 | All | CM only | 0.45 | 585 | H  | 0.91 | 0.76 | 1.08 | 0.2738 | 0.90 | 0.75 | 1.08 | 0.29658  |
| <i>CAND1</i>   | rs10459266                     | C/A | 12 | 0.21 | 3938 | All | CM only | 0.21 | 668 | R  | 1.19 | 0.82 | 1.73 | 0.3615 | 1.18 | 0.81 | 1.72 | 0.3127   |
| <i>CAND1</i>   | rs12307123                     | C/T | 12 | 0.23 | 3933 | All | CM only | 0.24 | 669 | A  | 1.09 | 0.95 | 1.25 | 0.2477 | 1.07 | 0.93 | 1.23 | 0.25064  |
| <i>CAND1</i>   | rs1566830                      | G/T | 12 | 0.26 | 3940 | All | CM only | 0.27 | 669 | A  | 1.10 | 0.96 | 1.25 | 0.1684 | 1.08 | 0.94 | 1.24 | 0.1629   |
| <i>GRIP1</i>   | rs1394263                      | T/C | 12 | 0.26 | 3914 | All | CM only | 0.27 | 666 | A  | 1.10 | 0.97 | 1.26 | 0.1508 | 1.08 | 0.95 | 1.24 | 0.14575  |
| <i>IL22</i>    | rs1012356                      | A/T | 12 | 0.49 | 3940 | All | CM only | 0.47 | 659 | D  | 0.91 | 0.75 | 1.09 | 0.2982 | 0.93 | 0.77 | 1.12 | 0.2899   |
| <i>IL22</i>    | rs2227478                      | A/G | 12 | 0.38 | 3939 | All | CM only | 0.39 | 661 | H  | 1.02 | 0.86 | 1.20 | 0.8511 | 1.07 | 0.90 | 1.27 | 0.84254  |
| <i>IL22</i>    | rs2227485                      | G/A | 12 | 0.42 | 3928 | All | CM only | 0.40 | 659 | A  | 0.93 | 0.83 | 1.05 | 0.2441 | 0.93 | 0.82 | 1.05 | 0.2562   |
| <i>IL22</i>    | rs2227491                      | C/T | 12 | 0.40 | 3870 | All | CM only | 0.43 | 646 | A  | 1.11 | 0.98 | 1.25 | 0.0932 | 1.09 | 0.97 | 1.24 | 0.090368 |
| <i>IL22</i>    | rs2227507                      | T/C | 12 | 0.04 | 3948 | All | CM only | 0.04 | 663 | R  | 1.79 | 0.47 | 6.82 | 0.4140 | 1.61 | 0.41 | 6.25 | 0.4152   |
| <i>TPTE2</i>   | rs182873742                    | C/G | 13 | 0.00 | 3940 | All | CM only | 0.00 | 665 | H  | -    | -    | -    | -      | -    | -    | -    | -        |
| <i>RPS6KL1</i> | rs3742785                      | C/A | 14 | 0.29 | 3714 | All | CM only | 0.30 | 632 | H  | 1.20 | 1.01 | 1.43 | 0.0366 | 1.17 | 0.98 | 1.40 | 0.0376   |
| <i>SPTB</i>    | rs229587                       | T/C | 14 | 0.34 | 3872 | All | CM only | 0.33 | 642 | R  | 0.78 | 0.58 | 1.03 | 0.0712 | 0.80 | 0.60 | 1.07 | 0.080607 |
| <i>YLP1</i>    | rs10139016                     | C/T | 14 | 0.25 | 3937 | All | CM only | 0.28 | 668 | D  | 1.27 | 1.07 | 1.50 | 0.0050 | 1.24 | 1.04 | 1.47 | 0.0049   |
| <i>ADCY9</i>   | rs10775349                     | C/G | 16 | 0.20 | 3941 | All | CM only | 0.20 | 587 | R  | 0.76 | 0.45 | 1.27 | 0.2732 | 0.81 | 0.48 | 1.36 | 0.27141  |
| <i>ADCY9</i>   | rs2230739                      | A/G | 16 | 0.09 | 3944 | All | CM only | 0.07 | 587 | H  | 0.77 | 0.60 | 1.01 | 0.0492 | 0.76 | 0.58 | 0.99 | 0.0499   |
| <i>HBA</i>     | α <sup>3.7</sup> -thalassaemia | I/D | 16 | 0.41 | 3946 | All | CM only | 0.37 | 646 | A  | 0.85 | 0.75 | 0.97 | 0.0126 | 0.76 | 0.59 | 0.99 | 0.022178 |
| <i>IL4</i>     | rs2243250                      | T/C | 16 | 0.20 | 3902 | All | CM only | 0.23 | 655 | D  | 1.19 | 1.00 | 1.41 | 0.0495 | 1.17 | 0.98 | 1.39 | 0.0439   |
| <i>IL4R</i>    | rs1805015                      | T/C | 16 | 0.42 | 3927 | All | CM only | 0.45 | 661 | D  | 1.20 | 1.00 | 1.44 | 0.0437 | 1.24 | 1.02 | 1.49 | 0.040194 |
| <i>ADORA2B</i> | rs2535611                      | T/C | 17 | 0.10 | 3911 | All | CM only | 0.10 | 586 | R  | 0.28 | 0.07 | 1.16 | 0.0330 | 0.25 | 0.06 | 1.06 | 0.0325   |
| <i>NOS2</i>    | rs1800482                      | G/C | 17 | 0.08 | 3922 | All | CM only | 0.07 | 659 | H  | 0.90 | 0.71 | 1.15 | 0.4109 | 0.89 | 0.69 | 1.14 | 0.36808  |
| <i>NOS2</i>    | rs2297518                      | G/A | 17 | 0.14 | 3910 | All | CM only | 0.12 | 582 | A  | 0.86 | 0.71 | 1.04 | 0.1051 | 0.86 | 0.71 | 1.04 | 0.1030   |
| <i>NOS2</i>    | rs8078340                      | C/T | 17 | 0.21 | 3948 | All | CM only | 0.20 | 662 | R  | 0.70 | 0.43 | 1.14 | 0.1306 | 0.68 | 0.42 | 1.11 | 0.13073  |
| <i>NOS2</i>    | rs9282799                      | C/T | 17 | 0.03 | 3949 | All | CM only | 0.04 | 659 | H  | 1.44 | 1.03 | 2.00 | 0.0378 | 1.36 | 0.95 | 1.93 | 0.0484   |
| <i>TBX2</i>    | rs73991577                     | A/G | 17 | 0.00 | 3937 | All | CM only | 0.00 | 669 | H  | 0.79 | 0.23 | 2.69 | 0.6962 | 0.81 | 0.23 | 2.83 | 0.70518  |
| <i>EMR1</i>    | rs373533                       | G/T | 19 | 0.46 | 3863 | All | CM only | 0.50 | 584 | A  | 1.13 | 1.00 | 1.28 | 0.0503 | 1.12 | 0.99 | 1.28 | 0.0577   |
| <i>EMR1</i>    | rs461645                       | C/T | 19 | 0.47 | 3933 | All | CM only | 0.50 | 587 | A  | 1.12 | 0.99 | 1.27 | 0.0728 | 1.11 | 0.98 | 1.26 | 0.082877 |
| <i>ICAM</i>    | rs5498                         | A/G | 19 | 0.11 | 3908 | All | CM only | 0.12 | 652 | H  | 0.99 | 0.80 | 1.21 | 0.9097 | 0.96 | 0.78 | 1.19 | 0.9401   |
| <i>GNAS</i>    | rs8386                         | C/T | 20 | 0.19 | 3944 | All | CM only | 0.20 | 660 | R  | 1.65 | 1.11 | 2.45 | 0.0186 | 1.65 | 1.10 | 2.48 | 0.018891 |
| <i>DERL3</i>   | rs1128127                      | G/A | 22 | 0.50 | 3911 | All | CM only | 0.48 | 660 | D  | 0.93 | 0.77 | 1.12 | 0.4317 | 0.91 | 0.75 | 1.11 | 0.4094   |
| <i>CD40LG</i>  | rs1126535                      | T/C | X  | 0.15 | 3934 | M+F | CM only | 0.17 | 662 | R  | 1.16 | 0.87 | 1.55 | 0.3039 | 1.18 | 0.87 | 1.58 | 0.30855  |
| <i>CD40LG</i>  | rs1126535                      | T/C | X  | 0.16 | 1947 | F   | CM only | 0.15 | 330 | D  | 0.92 | 0.71 | 1.20 | 0.5552 | 0.93 | 0.73 | 1.22 | 0.5652   |
| <i>CD40LG</i>  | rs1126535                      | C/T | X  | 0.85 | 1987 | M   | CM only | 0.82 | 332 | HM | 0.82 | 0.60 | 1.12 | 0.2124 | 0.84 | 0.62 | 1.22 | 0.2324   |
| <i>CD40LG</i>  | rs3092945                      | T/C | X  | 0.21 | 3927 | M+F | CM only | 0.26 | 663 | R  | 1.47 | 1.17 | 1.85 | 0.0013 | 1.52 | 1.20 | 1.92 | 0.0013   |
| <i>CD40LG</i>  | rs3092945                      | T/C | X  | 0.21 | 1942 | F   | CM only | 0.25 | 331 | R  | 2.27 | 1.46 | 3.52 | 0.0005 | 2.28 | 1.48 | 3.56 | 0.0005   |
| <i>CD40LG</i>  | rs3092945                      | C/T | X  | 0.78 | 1985 | M   | CM only | 0.73 | 332 | HM | 0.78 | 0.60 | 1.02 | 0.0736 | 0.79 | 0.63 | 1.09 | 0.0836   |
| <i>G6PD</i>    | rs1050828                      | C/T | X  | 0.19 | 3940 | M+F | CM only | 0.17 | 661 | D  | 0.83 | 0.69 | 1.02 | 0.0697 | 0.85 | 0.69 | 1.04 | 0.069691 |
| <i>G6PD</i>    | rs1050828                      | C/T | X  | 0.20 | 1951 | F   | CM only | 0.18 | 329 | H  | 0.79 | 0.61 | 1.02 | 0.0687 | 0.80 | 0.64 | 1.03 | 0.0787   |
| <i>G6PD</i>    | rs1050828                      | C/T | X  | 0.19 | 1989 | M   | CM only | 0.16 | 332 | HM | 0.84 | 0.61 | 1.15 | 0.2796 | 0.86 | 0.65 | 1.16 | 0.2996   |
| <i>G6PD</i>    | rs1050829                      | T/C | X  | 0.40 | 3928 | M+F | CM only | 0.41 | 660 | H  | 0.83 | 0.66 | 1.05 | 0.1242 | 0.87 | 0.68 | 1.12 | 0.1188   |
| <i>G6PD</i>    | rs1050829                      | T/C | X  | 0.41 | 1952 | F   | CM only | 0.42 | 329 | H  | 0.83 | 0.65 | 1.05 | 0.1193 | 0.85 | 0.68 | 1.07 | 0.1293   |
| <i>G6PD</i>    | rs1050829                      | C/T | X  | 0.60 | 1976 | M   | CM only | 0.60 | 331 | HM | 0.99 | 0.78 | 1.26 | 0.9445 | 0.99 | 0.81 | 1.28 | 0.9645   |

\* The rs8176719 polymorphism identifies blood-group O in the homozygous deletion form. The derived allele of rs8176746 identifies blood-group B. Chr = chromosome; DAF = derived allele frequency; MO = genotype model [A – additive, D – dominant, H – heterozygote, HM – hemizygous males, R – recessive] with respect to the derived allele; OR = Odds Ratio; LCI = Lower Confidence Interval (95%); UCI = Upper Confidence Interval; P = p-value using a logistic regression model as described in methods. § ORs and p-values unadjusted and adjusted for ethnic group, gender and rs334 genotype. Only those individuals solely having CM were included in this analysis.

**Table S9: Odds ratios for CM only for all polymorphisms investigated.**

| Gene      | SNPID       | Alleles (ancestral/derived) | Chr | DAF Controls | No. of genotype in controls | Sample | Case Phenotype | DAF Cases | No. of genotypes in cases | M O | Unadjusted |      |       |        | Adjusted <sup>§</sup> |      |       |        |
|-----------|-------------|-----------------------------|-----|--------------|-----------------------------|--------|----------------|-----------|---------------------------|-----|------------|------|-------|--------|-----------------------|------|-------|--------|
|           |             |                             |     |              |                             |        |                |           |                           |     | OR         | LCL  | UCL   | P      | OR                    | LCL  | UCL   | P      |
| AJAP1     | rs113788643 | A/G                         | 1   | 0.92         | 3940                        | All    | SMA only       | 0.91      | 227                       | R   | 1.94       | 0.58 | 6.45  | 0.3201 | 2.00                  | 0.60 | 6.69  | 0.3042 |
| AJAP1     | rs6674631   | G/A                         | 1   | 0.87         | 3928                        | All    | SMA only       | 0.88      | 228                       | R   | 0.91       | 0.68 | 1.22  | 0.5193 | 0.63                  | 0.20 | 2.04  | 0.4130 |
| ATP2B4    | rs10900585  | G/T                         | 1   | 0.66         | 3762                        | All    | SMA only       | 0.66      | 226                       | H   | 1.16       | 0.89 | 1.52  | 0.2687 | 1.18                  | 0.90 | 1.55  | 0.2251 |
| ATP2B4    | rs1541255   | A/G                         | 1   | 0.67         | 3933                        | All    | SMA only       | 0.67      | 226                       | R   | 0.86       | 0.54 | 1.37  | 0.5178 | 0.85                  | 0.53 | 1.34  | 0.4698 |
| ATP2B4    | rs3753036   | G/A                         | 1   | 0.96         | 3939                        | All    | SMA only       | 0.94      | 228                       | H   | 1.46       | 0.96 | 2.23  | 0.0932 | 1.45                  | 0.95 | 2.22  | 0.0993 |
| ATP2B4    | rs4951074   | G/A                         | 1   | 0.68         | 3934                        | All    | SMA only       | 0.68      | 227                       | H   | 1.17       | 0.89 | 1.53  | 0.2518 | 1.18                  | 0.90 | 1.55  | 0.2202 |
| ATP2B4    | rs55868763  | G/C                         | 1   | 0.67         | 3931                        | All    | SMA only       | 0.68      | 225                       | R   | 0.83       | 0.52 | 1.33  | 0.4231 | 0.82                  | 0.51 | 1.31  | 0.3877 |
| CR1       | rs17047660  | A/G                         | 1   | 0.84         | 3923                        | All    | SMA only       | 0.86      | 230                       | A   | 0.85       | 0.65 | 1.12  | 0.2318 | 0.83                  | 0.63 | 1.10  | 0.1810 |
| CR1       | rs17047661  | G/A                         | 1   | 0.68         | 3934                        | All    | SMA only       | 0.67      | 229                       | R   | 1.16       | 0.76 | 1.77  | 0.4879 | 1.23                  | 0.81 | 1.88  | 0.3447 |
| DARC      | rs2814778   | G/A                         | 1   | 1.00         | 3944                        | All    | SMA only       | 1.00      | 207                       | A   | 1.47       | 0.19 | 11.28 | 0.7265 | 1.30                  | 0.17 | 10.16 | 0.8073 |
| GBP7      | rs1803632   | G/C                         | 1   | 0.51         | 3942                        | All    | SMA only       | 0.52      | 230                       | H   | 0.91       | 0.70 | 1.19  | 0.5015 | 0.91                  | 0.69 | 1.18  | 0.4696 |
| IL10      | rs1800890   | A/T                         | 1   | 0.76         | 3945                        | All    | SMA only       | 0.74      | 230                       | H   | 1.17       | 0.89 | 1.53  | 0.2694 | 1.20                  | 0.91 | 1.57  | 0.2016 |
| IL10      | rs1800896   | T/C                         | 1   | 0.62         | 3943                        | All    | SMA only       | 0.61      | 227                       | R   | 1.25       | 0.87 | 1.78  | 0.2372 | 1.28                  | 0.90 | 1.84  | 0.1802 |
| IL10      | rs3024500   | G/A                         | 1   | 0.55         | 3928                        | All    | SMA only       | 0.55      | 229                       | H   | 0.76       | 0.58 | 0.99  | 0.0401 | 0.75                  | 0.57 | 0.98  | 0.0348 |
| LPHN2     | rs146428334 | A/G                         | 1   | 1.00         | 3930                        | All    | SMA only       | 1.00      | 228                       | A   | 0.52       | 0.07 | 3.81  | 0.4754 | 0.58                  | 0.08 | 4.29  | 0.5627 |
| LPHN2     | rs4650365   | T/C                         | 1   | 0.80         | 3936                        | All    | SMA only       | 0.81      | 228                       | H   | 0.83       | 0.62 | 1.11  | 0.2109 | 0.82                  | 0.61 | 1.10  | 0.1755 |
| LPHN2     | rs72933304  | C/A                         | 1   | 0.91         | 3942                        | All    | SMA only       | 0.93      | 228                       | R   | -          | -    | -     | -      | -                     | -    | -     | -      |
| LPHN2     | rs72933310  | T/C                         | 1   | 0.91         | 3927                        | All    | SMA only       | 0.92      | 228                       | R   | -          | -    | -     | -      | -                     | -    | -     | -      |
| LPHN2     | rs72933350  | T/C                         | 1   | 0.95         | 3940                        | All    | SMA only       | 0.96      | 228                       | A   | 0.77       | 0.47 | 1.26  | 0.2768 | 0.73                  | 0.44 | 1.20  | 0.1959 |
| IL1A      | rs17561     | G/T                         | 2   | 0.84         | 3938                        | All    | SMA only       | 0.85      | 230                       | H   | 0.75       | 0.55 | 1.03  | 0.0697 | 0.73                  | 0.53 | 1.01  | 0.0486 |
| IL1B      | rs1143634   | C/T                         | 2   | 0.89         | 3941                        | All    | SMA only       | 0.88      | 230                       | R   | 1.77       | 0.70 | 4.47  | 0.2657 | 1.61                  | 0.63 | 4.10  | 0.3464 |
| LAPTM4A   | rs973128    | C/G                         | 2   | 0.56         | 3885                        | All    | SMA only       | 0.53      | 225                       | R   | 1.28       | 0.93 | 1.77  | 0.1417 | 1.27                  | 0.92 | 1.75  | 0.1620 |
| LOC727982 | rs10188961  | A/G                         | 2   | 0.60         | 3934                        | All    | SMA only       | 0.58      | 227                       | D   | 1.14       | 0.86 | 1.52  | 0.3559 | 1.19                  | 0.89 | 1.58  | 0.2394 |
| LOC727982 | rs1371474   | T/C                         | 2   | 0.73         | 3933                        | All    | SMA only       | 0.71      | 228                       | H   | 1.16       | 0.89 | 1.53  | 0.2753 | 1.19                  | 0.91 | 1.57  | 0.2075 |
| LOC727982 | rs1371478   | C/T                         | 2   | 0.73         | 3909                        | All    | SMA only       | 0.72      | 226                       | H   | 1.14       | 0.87 | 1.50  | 0.3360 | 1.17                  | 0.89 | 1.54  | 0.2564 |
| SDC1      | rs11899121  | C/G                         | 2   | 0.53         | 3921                        | All    | SMA only       | 0.53      | 226                       | H   | 1.05       | 0.80 | 1.37  | 0.7268 | 1.06                  | 0.81 | 1.38  | 0.6948 |
| ZSWIM2    | rs144778284 | C/T                         | 2   | 1.00         | 3937                        | All    | SMA only       | 1.00      | 228                       | A   | 1.65       | 0.38 | 7.08  | 0.5285 | 1.34                  | 0.31 | 5.78  | 0.7062 |
| ZSWIM2    | rs4316902   | A/G                         | 2   | 0.82         | 3910                        | All    | SMA only       | 0.79      | 226                       | A   | 1.20       | 0.95 | 1.51  | 0.1352 | 1.22                  | 0.96 | 1.54  | 0.1087 |
| ARL14     | rs74954675  | A/C                         | 3   | 0.92         | 3907                        | All    | SMA only       | 0.89      | 228                       | H   | 1.56       | 1.11 | 2.18  | 0.0131 | 1.46                  | 1.04 | 2.05  | 0.0348 |
| ARL14     | rs75731597  | A/C                         | 3   | 0.92         | 3491                        | All    | SMA only       | 0.90      | 221                       | H   | 1.40       | 0.99 | 1.99  | 0.0649 | 1.33                  | 0.94 | 1.89  | 0.1191 |
| ARL14     | rs76033371  | A/G                         | 3   | 0.91         | 3939                        | All    | SMA only       | 0.89      | 228                       | H   | 1.48       | 1.06 | 2.06  | 0.0248 | 1.38                  | 0.99 | 1.93  | 0.0636 |
| B3GALNT1  | rs12107243  | G/C                         | 3   | 0.51         | 3934                        | All    | SMA only       | 0.50      | 228                       | D   | 1.15       | 0.84 | 1.58  | 0.3725 | 1.13                  | 0.82 | 1.55  | 0.4518 |
| IL17RD    | rs6780995   | A/G                         | 3   | 0.59         | 3939                        | All    | SMA only       | 0.60      | 230                       | H   | 1.23       | 0.94 | 1.60  | 0.1339 | 1.23                  | 0.94 | 1.61  | 0.1288 |
| IL17RE    | rs708567    | A/G                         | 3   | 0.50         | 3881                        | All    | SMA only       | 0.53      | 229                       | R   | 0.79       | 0.57 | 1.09  | 0.1401 | 0.80                  | 0.57 | 1.10  | 0.1633 |
| TLR9      | rs187084    | T/C                         | 3   | 0.67         | 3933                        | All    | SMA only       | 0.67      | 208                       | R   | 0.94       | 0.60 | 1.46  | 0.7783 | 0.92                  | 0.59 | 1.44  | 0.7131 |
| FREM3     | rs149914432 | A/C                         | 4   | 0.90         | 3915                        | All    | SMA only       | 0.94      | 226                       | A   | 0.56       | 0.38 | 0.84  | 0.0024 | 0.56                  | 0.38 | 0.84  | 0.0026 |
| FREM3     | rs184895969 | C/T                         | 4   | 1.00         | 3940                        | All    | SMA only       | 1.00      | 228                       | A   | 1.12       | 0.27 | 4.69  | 0.8829 | 1.01                  | 0.24 | 4.25  | 0.9932 |
| FREM3     | rs184908374 | G/A                         | 4   | 1.00         | 3943                        | All    | SMA only       | 1.00      | 228                       | A   | 1.39       | 0.33 | 5.89  | 0.6719 | 1.23                  | 0.29 | 5.27  | 0.7822 |
| FREM3     | rs186790584 | A/T                         | 4   | 0.90         | 3941                        | All    | SMA only       | 0.95      | 228                       | A   | 0.54       | 0.36 | 0.82  | 0.0015 | 0.55                  | 0.36 | 0.83  | 0.0018 |
| FREM3     | rs186873296 | A/G                         | 4   | 0.90         | 3926                        | All    | SMA only       | 0.95      | 226                       | A   | 0.51       | 0.33 | 0.78  | 0.0006 | 0.51                  | 0.33 | 0.78  | 0.0007 |
| GAB1      | rs7663712   | A/G                         | 4   | 0.98         | 3938                        | All    | SMA only       | 0.98      | 228                       | A   | 0.79       | 0.40 | 1.55  | 0.4748 | 0.82                  | 0.42 | 1.62  | 0.5562 |
| INPP4B    | rs13103597  | C/T                         | 4   | 0.73         | 3925                        | All    | SMA only       | 0.77      | 228                       | D   | 0.83       | 0.66 | 1.03  | 0.0912 | 0.79                  | 0.60 | 1.04  | 0.0849 |
| INPP4B    | rs77389579  | G/T                         | 4   | 0.93         | 3937                        | All    | SMA only       | 0.95      | 228                       | A   | 0.65       | 0.41 | 1.01  | 0.0430 | 0.64                  | 0.41 | 1.00  | 0.0383 |
| TLR1      | rs4833095   | C/T                         | 4   | 0.91         | 3921                        | All    | SMA only       | 0.92      | 208                       | H   | 0.65       | 0.42 | 1.05  | 0.0643 | 0.69                  | 0.45 | 1.06  | 0.0743 |
| TLR6      | rs5743809   | T/C                         | 4   | 0.94         | 3884                        | All    | SMA only       | 0.96      | 200                       | H   | 0.65       | 0.37 | 1.13  | 0.1036 | 0.63                  | 0.36 | 1.10  | 0.0822 |
| TLR6      | rs5743810   | C/T                         | 4   | 0.98         | 3936                        | All    | SMA only       | 0.98      | 208                       | R   | -          | -    | -     | -      | -                     | -    | -     | -      |
| USP38     | rs28459062  | T/C                         | 4   | 0.84         | 3931                        | All    | SMA only       | 0.83      | 227                       | H   | 1.06       | 0.79 | 1.43  | 0.6870 | 1.06                  | 0.79 | 1.44  | 0.6864 |
| USP38     | rs4266246   | C/T                         | 4   | 0.78         | 3928                        | All    | SMA only       | 0.76      | 227                       | R   | 1.85       | 1.13 | 3.02  | 0.0227 | 1.89                  | 1.15 | 3.09  | 0.0195 |
| C6        | rs1801033   | A/C                         | 5   | 0.53         | 3927                        | All    | SMA only       | 0.53      | 207                       | H   | 0.94       | 0.71 | 1.24  | 0.6586 | 0.92                  | 0.70 | 1.22  | 0.5694 |
| IL13      | rs20541     | C/T                         | 5   | 0.78         | 3796                        | All    | SMA only       | 0.78      | 195                       | R   | 0.48       | 0.20 | 1.19  | 0.0763 | 0.46                  | 0.19 | 1.13  | 0.0560 |
| IRF       | rs2706384   | C/A                         | 5   | 0.62         | 3819                        | All    | SMA only       | 0.65      | 204                       | R   | 0.67       | 0.42 | 1.06  | 0.0695 | 0.68                  | 0.43 | 1.08  | 0.0904 |
| CTL4      | rs2242665   | A/G                         | 6   | 0.74         | 3853                        | All    | SMA only       | 0.78      | 204                       | D   | 0.69       | 0.52 | 0.92  | 0.0115 | 0.69                  | 0.52 | 0.93  | 0.0131 |
| GABBR1    | rs192151845 | G/A                         | 6   | 0.99         | 3943                        | All    | SMA only       | 1.00      | 227                       | A   | 0.31       | 0.04 | 2.23  | 0.1529 | 0.31                  | 0.04 | 2.27  | 0.1612 |
| HCG4      | rs114980857 | C/T                         | 6   | 0.79         | 3843                        | All    | SMA only       | 0.79      | 225                       | R   | 0.70       | 0.34 | 1.45  | 0.3171 | 0.73                  | 0.35 | 1.49  | 0.3625 |
| HSPA1B    | rs6457452   | C/T                         | 6   | 0.81         | 3917                        | All    | SMA only       | 0.84      | 230                       | A   | 0.79       | 0.61 | 1.02  | 0.0675 | 0.79                  | 0.61 | 1.02  | 0.0586 |
| IL20RA    | rs1555498   | C/T                         | 6   | 0.54         | 3947                        | All    | SMA only       | 0.48      | 229                       | R   | 1.22       | 1.01 | 1.47  | 0.0363 | 1.31                  | 0.97 | 1.77  | 0.0824 |
| LTA       | rs2239704   | G/T                         | 6   | 0.88         | 3896                        | All    | SMA only       | 0.90      | 223                       | R   | -          | -    | -     | -      | -                     | -    | -     | -      |
| LTA       | rs909253    | T/C                         | 6   | 0.51         | 3921                        | All    | SMA only       | 0.46      | 227                       | D   | 1.38       | 0.99 | 1.92  | 0.0502 | 1.42                  | 1.02 | 1.98  | 0.0340 |
| PLEKHG1   | rs114726617 | G/A                         | 6   | 0.96         | 3940                        | All    | SMA only       | 0.96      | 228                       | R   | 2.17       | 0.27 | 17.39 | 0.5100 | 2.09                  | 0.26 | 16.98 | 0.5279 |
| PLEKHG1   | rs141555199 | C/G                         | 6   | 0.98         | 3943                        | All    | SMA only       | 0.98      | 228                       | A   | 0.76       | 0.35 | 1.62  | 0.4582 | 0.71                  | 0.33 | 1.52  | 0.3470 |
| PLEKHG1   | rs142712208 | G/A                         | 6   | 0.97         | 3927                        | All    | SMA only       | 0.97      | 228                       | R   | 2.88       | 0.35 | 24.02 | 0.3888 | 3.10                  | 0.37 | 26.17 | 0.3621 |
| PLEKHG1   | rs15116938  | C/T                         | 6   | 0.97         | 3939                        | All    | SMA only       | 0.96      | 228                       | R   | 2.89       | 0.35 | 24.09 | 0.3876 | 3.11                  | 0.37 | 26.23 | 0.3611 |
| PLEKHG1   | rs151293197 | C/G                         | 6   | 0.97         | 3940                        | All    | SMA only       | 0.97      | 228                       | R   | 2.89       | 0.35 | 24.09 | 0.3875 | 3.11                  | 0.37 | 26.24 | 0.3610 |
| PLEKHG1   | rs2131263   | C/T                         | 6   | 0.96         | 3938                        | All    | SMA only       | 0.96      | 228                       | R   | 2.16       | 0.27 | 17.38 | 0.5103 | 2.09                  | 0.26 | 16.97 | 0.5281 |
| PLEKHG1   | rs55958968  | A/G                         | 6   | 0.95         | 3932                        | All    | SMA only       | 0.94      | 228                       | A   | 1.23       | 0.83 | 1.81  | 0.3141 | 1.28                  | 0.87 | 1.90  | 0.2221 |
| PLEKHG1   | rs76924464  | G/A                         | 6   | 0.97         | 3940                        | All    | SMA only       | 0.97      | 228                       | R   | 2.89       | 0.35 | 24.09 | 0.3875 | 3.11                  | 0.37 | 26.25 | 0.3609 |
| PLEKHG1   | rs79100774  | G/C                         | 6   | 0.97         | 3939                        | All    | SMA only       | 0.97      | 228                       | R   | 2.89       | 0.35 | 24.09 | 0.3876 | 3.11                  | 0.37 | 26.23 | 0.3612 |
| SNORD48   | rs116288147 | C/T                         | 6   | 0.76         | 3896                        | All    | SMA only       | 0.79      | 227                       | A   | 0.85       | 0.67 | 1.07  | 0.1539 | 0.82                  | 0.65 | 1.03  | 0.0855 |
| TNF       | rs1799964   | T/C                         | 6   | 0.73         | 3938                        | All    | SMA only       | 0.71      | 228                       | R   | 1.05       | 0.86 | 1.30  | 0.6195 | 1.13                  | 0.70 | 1.84  | 0.6212 |
| TNF       | rs1800629   | G/A                         | 6   | 0.91         | 3940                        | All    | SMA only       | 0.90      | 228                       | R   | 1.74       | 0.53 | 5.74  | 0.3991 | 1.81                  | 0.54 | 5.99  | 0.3711 |
| TNF       | rs1800750   | G/A                         | 6   | 0.95         | 3868                        | All    | SMA only       | 0.92      | 125                       | H   | 1.62       | 0.98 | 2.66  | 0.0734 | 1.71                  | 1.04 | 2.83  | 0.0474 |
| TNF       | rs3093662   | A/G                         | 6   | 0.89         | 3936                        | All    | SMA only       | 0.90      | 227                       | H   | 0.79       | 0.55 | 1.14  | 0.1984 | 0.77                  | 0.53 | 1.11  | 0.1531 |
| TNF       | rs361525    | G/A                         | 6   | 0.93         | 3948                        | All    | SMA only       | 0.93      | 229                       | R   | -          | -    | -     | -      | -                     | -    | -     | -      |
| CD36      | rs3211938   | T/G                         | 7   | 0.90         | 3942                        | All    | SMA only       | 0.91      | 230                       | R   | 0.42       |      |       |        |                       |      |       |        |

|         |                                 |     |    |      |      |     |          |      |     |    |      |      |      |                        |      |      |      |                        |
|---------|---------------------------------|-----|----|------|------|-----|----------|------|-----|----|------|------|------|------------------------|------|------|------|------------------------|
| MKI67   | rs115947774                     | A/G | 10 | 1.00 | 3931 | All | SMA only | 1.00 | 226 | A  | 0.67 | 0.09 | 4.94 | 0.6734                 | 0.57 | 0.08 | 4.21 | 0.5448                 |
| MKI67   | rs148494166                     | T/C | 10 | 1.00 | 3913 | All | SMA only | 1.00 | 214 | A  | -    | -    | -    | -                      | -    | -    | -    | -                      |
| HBB     | rs334                           | A/T | 11 | 0.92 | 3949 | All | SMA only | 0.98 | 228 | H  | 0.10 | 0.04 | 0.27 | 9.68×10 <sup>-12</sup> | 0.10 | 0.04 | 0.28 | 3.87×10 <sup>-11</sup> |
| RRM1    | rs116472045                     | A/G | 11 | 0.98 | 3939 | All | SMA only | 0.97 | 228 | H  | 1.98 | 1.10 | 3.56 | 0.0368                 | 2.01 | 1.11 | 3.64 | 0.0334                 |
| RTN3    | rs542998                        | T/C | 11 | 0.57 | 3929 | All | SMA only | 0.51 | 201 | D  | 1.28 | 1.05 | 1.56 | 0.0164                 | 1.44 | 1.04 | 2.00 | 0.0234                 |
| TRIM5   | rs7935564                       | G/A | 11 | 0.56 | 3871 | All | SMA only | 0.51 | 206 | D  | 1.47 | 1.06 | 2.05 | 0.0177                 | 1.44 | 1.03 | 2.00 | 0.0269                 |
| CAND1   | rs10459266                      | C/A | 12 | 0.79 | 3938 | All | SMA only | 0.76 | 228 | H  | 1.31 | 1.00 | 1.73 | 0.0547                 | 1.32 | 1.00 | 1.74 | 0.0522                 |
| CAND1   | rs12307123                      | C/T | 12 | 0.77 | 3933 | All | SMA only | 0.78 | 228 | H  | 0.83 | 0.62 | 1.11 | 0.2087                 | 0.84 | 0.63 | 1.12 | 0.2402                 |
| CAND1   | rs1566830                       | G/T | 12 | 0.74 | 3940 | All | SMA only | 0.74 | 227 | H  | 0.84 | 0.64 | 1.11 | 0.2251                 | 0.84 | 0.64 | 1.12 | 0.2338                 |
| GRIP1   | rs1394263                       | T/C | 12 | 0.74 | 3914 | All | SMA only | 0.74 | 225 | H  | 0.83 | 0.62 | 1.10 | 0.1805                 | 0.83 | 0.62 | 1.10 | 0.1887                 |
| IL22    | rs1012356                       | A/T | 12 | 0.51 | 3940 | All | SMA only | 0.50 | 229 | D  | 1.07 | 0.82 | 1.40 | 0.6041                 | 1.10 | 0.80 | 1.50 | 0.5615                 |
| IL22    | rs2227478                       | A/G | 12 | 0.62 | 3939 | All | SMA only | 0.60 | 230 | D  | 1.19 | 0.90 | 1.57 | 0.2291                 | 1.14 | 0.86 | 1.51 | 0.3608                 |
| IL22    | rs2227485                       | G/A | 12 | 0.58 | 3928 | All | SMA only | 0.60 | 226 | R  | 0.67 | 0.45 | 1.00 | 0.0380                 | 0.69 | 0.46 | 1.03 | 0.0602                 |
| IL22    | rs2227491                       | C/T | 12 | 0.60 | 3870 | All | SMA only | 0.62 | 227 | R  | 0.69 | 0.46 | 1.05 | 0.0695                 | 0.68 | 0.45 | 1.03 | 0.0549                 |
| IL22    | rs2227507                       | T/C | 12 | 0.96 | 3948 | All | SMA only | 0.96 | 230 | R  | -    | -    | -    | -                      | -    | -    | -    | -                      |
| TPTE2   | rs182873742                     | C/G | 13 | 1.00 | 3940 | All | SMA only | 1.00 | 228 | A  | -    | -    | -    | -                      | -    | -    | -    | -                      |
| RPS6KL1 | rs3742785                       | C/A | 14 | 0.71 | 3714 | All | SMA only | 0.66 | 222 | D  | 1.38 | 1.05 | 1.81 | 0.0212                 | 1.40 | 1.06 | 1.84 | 0.0156                 |
| SPTB    | rs229587                        | T/C | 14 | 0.66 | 3872 | All | SMA only | 0.66 | 210 | H  | 0.90 | 0.68 | 1.20 | 0.4737                 | 0.89 | 0.67 | 1.18 | 0.4127                 |
| YLPM1   | rs10139016                      | C/T | 14 | 0.75 | 3937 | All | SMA only | 0.70 | 227 | D  | 1.33 | 1.02 | 1.74 | 0.0381                 | 1.36 | 1.04 | 1.78 | 0.0243                 |
| ADCY9   | rs10775349                      | C/G | 16 | 0.80 | 3941 | All | SMA only | 0.79 | 207 | H  | 1.08 | 0.81 | 1.45 | 0.6033                 | 1.08 | 0.81 | 1.46 | 0.5945                 |
| ADCY9   | rs2230739                       | A/G | 16 | 0.91 | 3944 | All | SMA only | 0.91 | 208 | H  | 0.61 | 0.08 | 4.48 | 0.5993                 | 1.08 | 0.75 | 1.58 | 0.6750                 |
| HBA     | α <sup>-3.7</sup> -thalassaemia | I/D | 16 | 0.59 | 3946 | All | SMA only | 0.67 | 218 | A  | 0.71 | 0.57 | 0.87 | 0.0009                 | 0.70 | 0.57 | 0.86 | 0.0007                 |
| IL4     | rs2243250                       | T/C | 16 | 0.80 | 3902 | All | SMA only | 0.77 | 224 | H  | 1.31 | 1.00 | 1.72 | 0.0560                 | 1.30 | 0.98 | 1.71 | 0.0716                 |
| IL4R    | rs1805015                       | T/C | 16 | 0.58 | 3927 | All | SMA only | 0.59 | 229 | D  | 0.91 | 0.69 | 1.20 | 0.5018                 | 0.90 | 0.68 | 1.19 | 0.4620                 |
| ADORA2B | rs2535611                       | T/C | 17 | 0.90 | 3911 | All | SMA only | 0.90 | 207 | R  | 0.45 | 0.06 | 3.27 | 0.3649                 | 0.40 | 0.05 | 2.94 | 0.2958                 |
| NOS2    | rs1800482                       | G/C | 17 | 0.92 | 3922 | All | SMA only | 0.91 | 229 | H  | 1.18 | 0.83 | 1.69 | 0.3695                 | 1.20 | 0.84 | 1.72 | 0.3328                 |
| NOS2    | rs2297518                       | G/A | 17 | 0.86 | 3910 | All | SMA only | 0.85 | 205 | A  | 1.09 | 0.83 | 1.44 | 0.5371                 | 1.07 | 0.81 | 1.42 | 0.6169                 |
| NOS2    | rs8078340                       | C/T | 17 | 0.79 | 3948 | All | SMA only | 0.80 | 230 | H  | 0.82 | 0.61 | 1.10 | 0.1803                 | 0.83 | 0.62 | 1.11 | 0.2009                 |
| NOS2    | rs9282799                       | C/T | 17 | 0.97 | 3949 | All | SMA only | 0.97 | 229 | H  | 1.34 | 0.78 | 2.30 | 0.3142                 | 1.29 | 0.75 | 2.22 | 0.3804                 |
| TBX2    | rs73991577                      | A/G | 17 | 1.00 | 3937 | All | SMA only | 1.00 | 228 | A  | 0.91 | 0.12 | 6.82 | 0.9245                 | 0.78 | 0.10 | 5.91 | 0.8061                 |
| EMR1    | rs373533                        | G/T | 19 | 0.54 | 3863 | All | SMA only | 0.51 | 207 | R  | 1.19 | 0.86 | 1.64 | 0.3115                 | 1.15 | 0.83 | 1.59 | 0.4097                 |
| EMR1    | rs461645                        | C/T | 19 | 0.53 | 3933 | All | SMA only | 0.51 | 208 | R  | 1.19 | 0.86 | 1.64 | 0.3071                 | 1.15 | 0.83 | 1.59 | 0.4081                 |
| ICAM    | rs5498                          | A/G | 19 | 0.89 | 3908 | All | SMA only | 0.88 | 226 | R  | 1.91 | 0.81 | 4.49 | 0.1707                 | 1.73 | 0.73 | 4.09 | 0.2410                 |
| GNAS    | rs8386                          | C/T | 20 | 0.81 | 3944 | All | SMA only | 0.79 | 230 | R  | 1.68 | 0.92 | 3.09 | 0.1159                 | 1.69 | 0.92 | 3.10 | 0.1153                 |
| DERL3   | rs1128127                       | G/A | 22 | 0.50 | 3911 | All | SMA only | 0.57 | 228 | A  | 0.78 | 0.64 | 0.94 | 0.0076                 | 0.79 | 0.65 | 0.96 | 0.0154                 |
| CD40LG  | rs1126535                       | T/C | x  | 0.85 | 3934 | M+F | SMA only | 0.86 | 229 | H  | 0.60 | 0.37 | 0.98 | 0.0280                 | 0.68 | 0.41 | 1.14 | 0.1355                 |
| CD40LG  | rs1126535                       | T/C | x  | 0.85 | 3934 | F   | SMA only | 0.86 | 229 | H  | 0.70 | 0.42 | 1.17 | 0.1605                 | 0.73 | 0.47 | 1.14 | 0.1341                 |
| CD40LG  | rs1126535                       | T/C | x  | 0.85 | 3934 | M   | SMA only | 0.86 | 229 | HM | 0.93 | 0.57 | 1.50 | 0.7596                 | 0.94 | 0.58 | 1.52 | 0.7940                 |
| CD40LG  | rs3092945                       | T/C | x  | 0.79 | 3927 | M+F | SMA only | 0.69 | 227 | A  | 1.94 | 1.41 | 2.68 | 0.0001                 | 1.35 | 1.14 | 1.59 | 0.0005                 |
| CD40LG  | rs3092945                       | T/C | x  | 0.79 | 3927 | F   | SMA only | 0.69 | 227 | H  | 1.78 | 1.30 | 2.43 | 0.0005                 | 1.74 | 1.27 | 2.39 | 0.0008                 |
| CD40LG  | rs3092945                       | T/C | x  | 0.79 | 3927 | M   | SMA only | 0.69 | 227 | HM | 0.65 | 0.44 | 0.95 | 0.0321                 | 0.66 | 0.45 | 0.97 | 0.0411                 |
| G6PD    | rs1050828                       | C/T | x  | 0.81 | 3940 | M+F | SMA only | 0.76 | 229 | R  | 1.74 | 1.23 | 2.48 | 0.0033                 | 1.63 | 1.13 | 2.36 | 0.0122                 |
| G6PD    | rs1050828                       | C/T | x  | 0.81 | 3940 | F   | SMA only | 0.76 | 229 | H  | 0.85 | 0.54 | 1.33 | 0.4602                 | 0.84 | 0.54 | 1.32 | 0.4465                 |
| G6PD    | rs1050828                       | C/T | x  | 0.81 | 3940 | M   | SMA only | 0.76 | 229 | HM | 1.72 | 1.16 | 2.54 | 0.0093                 | 1.76 | 1.18 | 2.60 | 0.0070                 |
| G6PD    | rs1050829                       | T/C | x  | 0.60 | 3928 | M+F | SMA only | 0.57 | 229 | R  | 0.80 | 0.57 | 1.11 | 0.1659                 | 1.12 | 0.83 | 1.51 | 0.4527                 |
| G6PD    | rs1050829                       | T/C | x  | 0.60 | 3928 | F   | SMA only | 0.57 | 229 | H  | 0.84 | 0.62 | 1.13 | 0.2401                 | 0.83 | 0.62 | 1.13 | 0.2426                 |
| G6PD    | rs1050829                       | T/C | x  | 0.60 | 3928 | M   | SMA only | 0.57 | 229 | HM | 0.75 | 0.53 | 1.07 | 0.1164                 | 0.76 | 0.53 | 1.08 | 0.1282                 |

\* The rs8176719 polymorphism identifies blood-group O in the homozygous deletion form. The derived allele of rs8176746 identifies blood-group B. Chr = chromosome; DAF = derived allele frequency; MO = genotype model [A – additive, D – dominant, H – heterozygote, HM – hemizygous males, R – recessive] with respect to the derived allele; OR = Odds Ratio; LCI = Lower Confidence Interval (95%); UCI = Upper Confidence Interval; P = p-value using a logistic regression model as described in methods. § ORs and p-values unadjusted and adjusted for ethnic group, gender and *rs334*. Only those individuals solely having SMA were included in this analysis.

**Table S10: Odds ratios for SMA only for all polymorphisms investigated.**

| Gene      | SNPID       | Alleles<br>(ancestral/<br>derived) | Chr | DAF<br>Controls | No. of<br>genotype<br>in controls | Sample | Case<br>Phenotype | DAF<br>Cases | No. of<br>genotypes<br>in cases | MO | Unadjusted |      |       |        | Adjusted <sup>s</sup> |      |       |          |
|-----------|-------------|------------------------------------|-----|-----------------|-----------------------------------|--------|-------------------|--------------|---------------------------------|----|------------|------|-------|--------|-----------------------|------|-------|----------|
|           |             |                                    |     |                 |                                   |        |                   |              |                                 |    | OR         | LCL  | UCL   | P      | OR                    | LCL  | UCL   | P        |
| AJAP1     | rs113788643 | A/G                                | 1   | 0.08            | 3940                              | All    | RD_only           | 0.06         | 157                             | R  | -          | -    | -     | -      | -                     | -    | -     | -        |
| AJAP1     | rs6674631   | G/A                                | 1   | 0.13            | 3928                              | All    | RD_only           | 0.14         | 157                             | H  | 1.28       | 0.89 | 1.85  | 0.1872 | 1.33                  | 0.92 | 1.93  | 0.15938  |
| ATP2B4    | rs10900585  | G/T                                | 1   | 0.34            | 3762                              | All    | RD_only           | 0.37         | 157                             | H  | 1.66       | 1.05 | 2.85  | 0.0229 | 1.67                  | 1.08 | 2.44  | 0.0251   |
| ATP2B4    | rs1541255   | A/G                                | 1   | 0.33            | 3933                              | All    | RD_only           | 0.36         | 157                             | H  | 0.63       | 0.48 | 0.87  | 0.0275 | 0.66                  | 0.50 | 0.90  | 0.027579 |
| ATP2B4    | rs3753036   | G/A                                | 1   | 0.04            | 3939                              | All    | RD_only           | 0.04         | 157                             | R  | 4.94       | 0.57 | 42.62 | 0.2241 | 7.94                  | 0.83 | 76.21 | 0.2218   |
| ATP2B4    | rs4951074   | G/A                                | 1   | 0.32            | 3934                              | All    | RD_only           | 0.35         | 157                             | H  | 1.32       | 0.96 | 1.82  | 0.0879 | 1.09                  | 0.59 | 2.04  | 0.063237 |
| ATP2B4    | rs55868763  | G/C                                | 1   | 0.33            | 3931                              | All    | RD_only           | 0.36         | 157                             | H  | 1.39       | 1.01 | 1.92  | 0.0432 | 1.49                  | 1.10 | 1.98  | 0.0440   |
| CR1       | rs17047660  | A/G                                | 1   | 0.16            | 3923                              | All    | RD_only           | 0.18         | 156                             | A  | 1.15       | 0.85 | 1.55  | 0.3637 | 1.22                  | 0.90 | 1.66  | 0.33548  |
| CR1       | rs17047661  | G/A                                | 1   | 0.32            | 3934                              | All    | RD_only           | 0.33         | 155                             | R  | 1.37       | 0.85 | 2.22  | 0.2151 | 1.22                  | 0.73 | 2.03  | 0.2094   |
| DARC      | rs2814778   | G/A                                | 1   | 0.00            | 3944                              | All    | RD_only           | 0.00         | 151                             | H  | -          | -    | -     | -      | -                     | -    | -     | -        |
| GBP7      | rs1803632   | G/C                                | 1   | 0.49            | 3942                              | All    | RD_only           | 0.49         | 156                             | H  | 0.85       | 0.61 | 1.17  | 0.3037 | 0.89                  | 0.64 | 1.23  | 0.3454   |
| IL10      | rs1800890   | A/T                                | 1   | 0.24            | 3945                              | All    | RD_only           | 0.22         | 156                             | R  | 0.29       | 0.09 | 0.91  | 0.0092 | 0.27                  | 0.08 | 0.88  | 0.009432 |
| IL10      | rs1800896   | T/C                                | 1   | 0.38            | 3943                              | All    | RD_only           | 0.36         | 156                             | R  | 0.75       | 0.45 | 1.25  | 0.2542 | 0.74                  | 0.44 | 1.25  | 0.2693   |
| IL10      | rs3024500   | G/A                                | 1   | 0.45            | 3928                              | All    | RD_only           | 0.45         | 155                             | H  | 1.35       | 0.97 | 1.87  | 0.0707 | 1.36                  | 0.98 | 1.90  | 0.057556 |
| LPHN2     | rs146428334 | A/G                                | 1   | 0.00            | 3930                              | All    | RD_only           | 0.01         | 157                             | H  | 1.53       | 0.36 | 6.43  | 0.5876 | 1.54                  | 0.36 | 6.61  | 0.5752   |
| LPHN2     | rs4650365   | T/C                                | 1   | 0.20            | 3936                              | All    | RD_only           | 0.19         | 157                             | R  | 0.70       | 0.25 | 1.91  | 0.4562 | 0.77                  | 0.28 | 2.11  | 0.48287  |
| LPHN2     | rs72933304  | C/A                                | 1   | 0.09            | 3942                              | All    | RD_only           | 0.09         | 157                             | H  | 1.12       | 0.73 | 1.70  | 0.6173 | 1.14                  | 0.74 | 1.76  | 0.5766   |
| LPHN2     | rs72933310  | T/C                                | 1   | 0.09            | 3927                              | All    | RD_only           | 0.10         | 157                             | H  | 1.13       | 0.75 | 1.71  | 0.5678 | 1.14                  | 0.75 | 1.74  | 0.52604  |
| LPHN2     | rs72933350  | T/C                                | 1   | 0.05            | 3940                              | All    | RD_only           | 0.07         | 157                             | A  | 1.40       | 0.89 | 2.22  | 0.1663 | 1.47                  | 0.92 | 2.35  | 0.1538   |
| IL1A      | rs17561     | G/T                                | 2   | 0.16            | 3938                              | All    | RD_only           | 0.20         | 156                             | R  | 2.15       | 1.02 | 4.51  | 0.0664 | 2.39                  | 1.13 | 5.09  | 0.064612 |
| IL1B      | rs1143634   | C/T                                | 2   | 0.11            | 3941                              | All    | RD_only           | 0.10         | 156                             | A  | 0.84       | 0.57 | 1.22  | 0.3494 | 0.81                  | 0.55 | 1.20  | 0.3628   |
| LAPTM4A   | rs973128    | C/G                                | 2   | 0.44            | 3885                              | All    | RD_only           | 0.35         | 156                             | D  | 0.55       | 0.40 | 0.75  | 0.0003 | 0.53                  | 0.38 | 0.74  | 0.000191 |
| LOC727982 | rs10188961  | A/G                                | 2   | 0.40            | 3934                              | All    | RD_only           | 0.44         | 157                             | A  | 1.20       | 0.95 | 1.50  | 0.1242 | 1.17                  | 0.93 | 1.47  | 0.1616   |
| LOC727982 | rs1371474   | T/C                                | 2   | 0.27            | 3933                              | All    | RD_only           | 0.31         | 157                             | H  | 1.63       | 1.18 | 2.25  | 0.0029 | 1.69                  | 1.22 | 2.35  | 0.002967 |
| LOC727982 | rs1371478   | C/T                                | 2   | 0.27            | 3909                              | All    | RD_only           | 0.30         | 157                             | H  | 1.71       | 1.24 | 2.36  | 0.0011 | 1.73                  | 1.25 | 2.40  | 0.0019   |
| SDC1      | rs11899121  | C/G                                | 2   | 0.47            | 3921                              | All    | RD_only           | 0.50         | 157                             | D  | 1.24       | 0.85 | 1.80  | 0.2514 | 1.27                  | 0.87 | 1.85  | 0.29507  |
| ZSWIM2    | rs144778284 | C/T                                | 2   | 0.00            | 3937                              | All    | RD_only           | 0.00         | 157                             | H  | 1.13       | 0.15 | 8.51  | 0.9058 | 1.31                  | 0.17 | 10.14 | 0.9004   |
| ZSWIM2    | rs4316902   | A/G                                | 2   | 0.18            | 3910                              | All    | RD_only           | 0.17         | 153                             | H  | 0.75       | 0.51 | 1.10  | 0.1343 | 0.79                  | 0.53 | 1.16  | 0.16013  |
| ARL14     | rs74954675  | A/C                                | 3   | 0.08            | 3907                              | All    | RD_only           | 0.08         | 156                             | R  | -          | -    | -     | -      | -                     | -    | -     | -        |
| ARL14     | rs75731597  | A/C                                | 3   | 0.08            | 3491                              | All    | RD_only           | 0.10         | 157                             | R  | -          | -    | -     | -      | -                     | -    | -     | -        |
| ARL14     | rs76033371  | A/G                                | 3   | 0.09            | 3939                              | All    | RD_only           | 0.10         | 157                             | R  | -          | -    | -     | -      | -                     | -    | -     | -        |
| B3GALNT1  | rs12107243  | G/C                                | 3   | 0.49            | 3934                              | All    | RD_only           | 0.46         | 157                             | A  | 0.89       | 0.71 | 1.13  | 0.3422 | 0.93                  | 0.74 | 1.18  | 0.39756  |
| IL17RD    | rs6780995   | A/G                                | 3   | 0.41            | 3939                              | All    | RD_only           | 0.40         | 156                             | R  | 0.96       | 0.62 | 1.47  | 0.8356 | 0.98                  | 0.63 | 1.51  | 0.8753   |
| IL17RE    | rs708567    | A/G                                | 3   | 0.50            | 3881                              | All    | RD_only           | 0.45         | 154                             | A  | 0.82       | 0.66 | 1.04  | 0.0967 | 0.81                  | 0.64 | 1.02  | 0.11682  |
| TLR9      | rs187084    | T/C                                | 3   | 0.33            | 3933                              | All    | RD_only           | 0.33         | 151                             | R  | 0.83       | 0.48 | 1.43  | 0.4990 | 1.14                  | 0.81 | 1.58  | 0.4593   |
| FREM3     | rs149914432 | A/C                                | 4   | 0.10            | 3915                              | All    | RD_only           | 0.06         | 157                             | H  | 0.46       | 0.26 | 0.80  | 0.0025 | 0.48                  | 0.24 | 0.95  | 0.002561 |
| FREM3     | rs184895969 | C/T                                | 4   | 0.00            | 3940                              | All    | RD_only           | 0.01         | 157                             | H  | 3.13       | 1.09 | 9.02  | 0.0649 | 8.15                  | 2.19 | 30.36 | 0.0633   |
| FREM3     | rs184908374 | G/A                                | 4   | 0.00            | 3943                              | All    | RD_only           | 0.01         | 157                             | H  | 2.90       | 0.86 | 9.74  | 0.1313 | 6.51                  | 1.54 | 27.44 | 0.12848  |
| FREM3     | rs186790584 | A/T                                | 4   | 0.10            | 3941                              | All    | RD_only           | 0.06         | 157                             | H  | 0.47       | 0.27 | 0.81  | 0.0031 | 0.47                  | 0.27 | 0.8   | 0.0033   |
| FREM3     | rs186873296 | A/G                                | 4   | 0.10            | 3926                              | All    | RD_only           | 0.06         | 157                             | H  | 0.47       | 0.27 | 0.83  | 0.0038 | 0.48                  | 0.29 | 0.82  | 0.003987 |
| GAB1      | rs7663712   | A/G                                | 4   | 0.02            | 3938                              | All    | RD_only           | 0.01         | 157                             | A  | 0.51       | 0.19 | 1.39  | 0.1433 | 0.51                  | 0.19 | 1.38  | 0.1530   |
| INPP4B    | rs13103597  | C/T                                | 4   | 0.27            | 3925                              | All    | RD_only           | 0.21         | 157                             | D  | 0.64       | 0.46 | 0.90  | 0.0086 | 0.70                  | 0.48 | 1.02  | 0.004952 |
| INPP4B    | rs77389579  | G/T                                | 4   | 0.07            | 3937                              | All    | RD_only           | 0.04         | 157                             | A  | 0.57       | 0.32 | 1.01  | 0.0358 | 0.70                  | 0.46 | 0.9   | 0.0213   |
| TLR1      | rs4833095   | C/T                                | 4   | 0.09            | 3921                              | All    | RD_only           | 0.12         | 150                             | A  | 1.40       | 0.98 | 2.01  | 0.0764 | 1.31                  | 0.90 | 1.89  | 0.070727 |
| TLR6      | rs5743809   | T/C                                | 4   | 0.06            | 3884                              | All    | RD_only           | 0.06         | 145                             | R  | 3.68       | 0.82 | 16.40 | 0.1441 | 3.71                  | 0.81 | 17.04 | 0.1424   |
| TLR6      | rs5743810   | C/T                                | 4   | 0.02            | 3936                              | All    | RD_only           | 0.03         | 151                             | H  | 2.02       | 1.00 | 4.09  | 0.0737 | 2.02                  | 0.99 | 4.14  | 0.071669 |
| USP38     | rs28459062  | T/C                                | 4   | 0.16            | 3931                              | All    | RD_only           | 0.18         | 157                             | D  | 1.11       | 0.79 | 1.57  | 0.5522 | 1.05                  | 0.78 | 1.43  | 0.5949   |
| USP38     | rs4266246   | C/T                                | 4   | 0.22            | 3928                              | All    | RD_only           | 0.22         | 157                             | R  | 1.42       | 0.73 | 2.74  | 0.3195 | 1.34                  | 0.69 | 2.61  | 0.29847  |
| C6        | rs1801033   | A/C                                | 5   | 0.47            | 3927                              | All    | RD_only           | 0.44         | 150                             | D  | 0.72       | 0.51 | 1.02  | 0.0654 | 0.72                  | 0.51 | 1.02  | 0.0586   |
| IL13      | rs20541     | C/T                                | 5   | 0.22            | 3796                              | All    | RD_only           | 0.24         | 144                             | A  | 1.13       | 0.86 | 1.48  | 0.3936 | 1.13                  | 0.86 | 1.48  | 0.34347  |
| IRF       | rs2706384   | C/A                                | 5   | 0.38            | 3819                              | All    | RD_only           | 0.38         | 144                             | R  | 1.13       | 0.72 | 1.79  | 0.6008 | 1.06                  | 0.67 | 1.69  | 0.5697   |
| CTLA      | rs2242665   | A/G                                | 6   | 0.26            | 3853                              | All    | RD_only           | 0.32         | 150                             | R  | 1.83       | 1.10 | 3.05  | 0.0289 | 1.32                  | 1.02 | 1.70  | 0.025206 |
| GABBR1    | rs192151845 | G/A                                | 6   | 0.01            | 3943                              | All    | RD_only           | 0.01         | 157                             | H  | 1.33       | 0.41 | 4.32  | 0.6438 | 0.88                  | 0.21 | 3.67  | 0.8750   |
| HCG4      | rs114980857 | C/T                                | 6   | 0.21            | 3843                              | All    | RD_only           | 0.20         | 150                             | A  | 0.91       | 0.69 | 1.22  | 0.5392 | 0.89                  | 0.67 | 1.19  | 0.57831  |
| HSPA1B    | rs6457452   | C/T                                | 6   | 0.19            | 3917                              | All    | RD_only           | 0.17         | 157                             | A  | 0.86       | 0.63 | 1.16  | 0.3047 | 0.85                  | 0.63 | 1.16  | 0.2810   |
| IL20RA    | rs1555498   | C/T                                | 6   | 0.46            | 3947                              | All    | RD_only           | 0.44         | 156                             | D  | 0.82       | 0.58 | 1.15  | 0.2508 | 0.87                  | 0.61 | 1.24  | 0.30236  |
| LTA       | rs2239704   | G/T                                | 6   | 0.12            | 3896                              | All    | RD_only           | 0.14         | 153                             | H  | 1.37       | 0.95 | 1.97  | 0.0955 | 1.32                  | 0.91 | 1.91  | 0.0873   |
| LTA       | rs909253    | T/C                                | 6   | 0.49            | 3921                              | All    | RD_only           | 0.48         | 155                             | D  | 0.96       | 0.67 | 1.38  | 0.8402 | 1.00                  | 0.79 | 1.25  | 0.91093  |
| PLEKHG1   | rs114726617 | G/A                                | 6   | 0.04            | 3940                              | All    | RD_only           | 0.05         | 157                             | H  | 1.41       | 0.81 | 2.43  | 0.2391 | 1.37                  | 0.77 | 2.44  | 0.3355   |
| PLEKHG1   | rs141555199 | C/G                                | 6   | 0.02            | 3943                              | All    | RD_only           | 0.02         | 157                             | R  | -          | -    | -     | -      | -                     | -    | -     | -        |
| PLEKHG1   | rs142712208 | G/A                                | 6   | 0.03            | 3927                              | All    | RD_only           | 0.04         | 157                             | H  | 1.29       | 0.70 | 2.36  | 0.4273 | 1.38                  | 0.74 | 2.57  | 0.3974   |
| PLEKHG1   | rs15116938  | C/T                                | 6   | 0.03            | 3939                              | All    | RD_only           | 0.04         | 157                             | R  | -          | -    | -     | -      | -                     | -    | -     | -        |
| PLEKHG1   | rs151293197 | C/G                                | 6   | 0.03            | 3940                              | All    | RD_only           | 0.04         | 156                             | H  | 1.25       | 0.68 | 2.29  | 0.4826 | 1.32                  | 0.71 | 2.46  | 0.4501   |
| PLEKHG1   | rs2131263   | C/T                                | 6   | 0.04            | 3938                              | All    | RD_only           | 0.05         | 157                             | H  | 1.41       | 0.81 | 2.43  | 0.2397 | 1.37                  | 0.77 | 2.44  | 0.33629  |
| PLEKHG1   | rs55958968  | A/G                                | 6   | 0.05            | 3932                              | All    | RD_only           | 0.07         | 157                             | H  | 1.42       | 0.89 | 2.29  | 0.1578 | 1.39                  | 0.85 | 2.25  | 0.1400   |
| PLEKHG1   | rs76924464  | G/A                                | 6   | 0.03            | 3940                              | All    | RD_only           | 0.04         | 157                             | R  | -          | -    | -     | -      | -                     | -    | -     | -        |
| PLEKHG1   | rs79100774  | G/C                                | 6   | 0.03            | 3939                              | All    | RD_only           | 0.04         | 157                             | R  | -          | -    | -     | -      | -                     | -    | -     | -        |
| SNORD48   | rs116288147 | C/T                                | 6   | 0.24            | 3896                              | All    | RD_only           | 0.21         | 156                             | A  | 0.86       | 0.65 | 1.14  | 0.2896 | 0.55                  | 0.22 | 1.39  | 0.17612  |
| TNF       | rs1799964   | T/C                                | 6   | 0.27            | 3938                              | All    | RD_only           | 0.24         | 155                             | R  | 0.58       | 0.27 | 1.25  | 0.1315 | 0.50                  | 0.22 | 1.14  | 0.0640   |
| TNF       | rs1800629   | G/A                                | 6   | 0.09            | 3940                              | All    | RD_only           | 0.09         | 156                             | R  | 3.46       | 1.20 | 9.97  | 0.0477 | 3.37                  | 1.13 | 9.98  | 0.04709  |
| TNF       | rs1800750   | G/A                                | 6   | 0.05            | 3868                              | All    | RD_only           | 0.03         | 58                              | A  | 0.66       | 0.24 | 1.77  | 0.3711 | 0.67                  | 0.25 | 1.81  | 0.3678   |
| TNF       | rs3093662   | A/G                                | 6   | 0.11            | 3936                              | All    | RD_only           | 0.10         | 154                             | D  | 0.87       | 0.58 | 1.32  | 0.5198 | 0.87                  | 0.57 | 1.32  | 0.54979  |
| TNF       | rs361525    | G/A                                | 6   | 0.07            | 3948                              | All    | RD_only           | 0.05         | 156                             | R  | -          | -    | -     | -      | -                     | -    | -     | -        |
| CD36      | rs3211938   | T/G                                | 7   | 0.10            | 3942                              | All    | RD_only           | 0.09         | 155                             | H  | 0.88       | 0.56 | 1.37  | 0.5574 | 0.89                  | 0.57 | 1.40  | 0.57785  |
| NOD1      | rs2075820   | G/A                                | 7   | 0.38            | 3941                              | All    | RD                |              |                                 |    |            |      |       |        |                       |      |       |          |

|                |                              |     |    |      |      |     |         |      |     |    |      |      |       |                       |      |      |       |                       |
|----------------|------------------------------|-----|----|------|------|-----|---------|------|-----|----|------|------|-------|-----------------------|------|------|-------|-----------------------|
| <i>MKI67</i>   | rs11016116                   | A/G | 10 | 0.02 | 3944 | All | RD_only | 0.03 | 157 | R  | -    | -    | -     | -                     | -    | -    | -     | -                     |
| <i>MKI67</i>   | rs115947774                  | A/G | 10 | 0.00 | 3931 | All | RD_only | 0.00 | 156 | H  | 0.91 | 0.12 | 6.79  | 0.9269                | 0.79 | 0.10 | 5.98  | 0.9345                |
| <i>MKI67</i>   | rs148494166                  | T/C | 10 | 0.00 | 3913 | All | RD_only | 0.01 | 146 | H  | 3.58 | 0.81 | 15.78 | 0.1496                | 3.30 | 0.74 | 14.82 | 0.14532               |
| <i>HBB</i>     | rs334                        | A/T | 11 | 0.08 | 3949 | All | RD_only | 0.02 | 156 | A  | 0.18 | 0.08 | 0.45  | 5.0x10 <sup>-07</sup> | 0.19 | 0.08 | 0.46  | 5.8x10 <sup>-07</sup> |
| <i>RRM1</i>    | rs116472045                  | A/G | 11 | 0.02 | 3939 | All | RD_only | 0.04 | 157 | H  | 2.64 | 1.42 | 4.90  | 0.0060                | 2.59 | 1.38 | 4.86  | 0.005081              |
| <i>RTN3</i>    | rs542998                     | T/C | 11 | 0.43 | 3929 | All | RD_only | 0.41 | 147 | H  | 0.88 | 0.63 | 1.22  | 0.4422                | 0.82 | 0.58 | 1.15  | 0.3977                |
| <i>TRIM5</i>   | rs7935564                    | G/A | 11 | 0.44 | 3871 | All | RD_only | 0.47 | 151 | R  | 1.40 | 0.95 | 2.05  | 0.0963                | 1.29 | 0.87 | 1.90  | 0.091014              |
| <i>CAND1</i>   | rs10459266                   | C/A | 12 | 0.21 | 3938 | All | RD_only | 0.28 | 157 | D  | 1.69 | 1.23 | 2.33  | 0.0014                | 1.75 | 1.26 | 2.42  | 0.0009                |
| <i>CAND1</i>   | rs12307123                   | C/T | 12 | 0.23 | 3933 | All | RD_only | 0.26 | 156 | A  | 1.22 | 0.94 | 1.58  | 0.1323                | 1.17 | 0.90 | 1.52  | 0.17144               |
| <i>CAND1</i>   | rs1566830                    | G/T | 12 | 0.26 | 3940 | All | RD_only | 0.30 | 157 | R  | 1.76 | 1.05 | 2.97  | 0.0449                | 1.76 | 1.04 | 2.98  | 0.0409                |
| <i>GRIP1</i>   | rs1394263                    | T/C | 12 | 0.26 | 3914 | All | RD_only | 0.30 | 157 | R  | 1.76 | 1.05 | 2.96  | 0.0459                | 1.74 | 1.03 | 2.95  | 0.041826              |
| <i>IL22</i>    | rs1012356                    | A/T | 12 | 0.49 | 3940 | All | RD_only | 0.47 | 156 | R  | 0.85 | 0.57 | 1.26  | 0.4147                | 0.88 | 0.59 | 1.31  | 0.4368                |
| <i>IL22</i>    | rs2227478                    | A/G | 12 | 0.38 | 3939 | All | RD_only | 0.40 | 156 | H  | 1.19 | 0.86 | 1.64  | 0.2908                | 1.25 | 0.90 | 1.73  | 0.24654               |
| <i>IL22</i>    | rs2227485                    | G/A | 12 | 0.42 | 3928 | All | RD_only | 0.40 | 156 | R  | 0.68 | 0.42 | 1.09  | 0.0939                | 0.67 | 0.41 | 1.08  | 0.0977                |
| <i>IL22</i>    | rs2227491                    | C/T | 12 | 0.40 | 3870 | All | RD_only | 0.41 | 151 | H  | 1.14 | 0.82 | 1.58  | 0.4365                | 1.13 | 0.81 | 1.57  | 0.38947               |
| <i>IL22</i>    | rs2227507                    | T/C | 12 | 0.04 | 3948 | All | RD_only | 0.04 | 156 | R  | -    | -    | -     | -                     | -    | -    | -     | -                     |
| <i>TPTE2</i>   | rs182873742                  | C/G | 13 | 0.00 | 3940 | All | RD_only | 0.00 | 157 | H  | -    | -    | -     | -                     | -    | -    | -     | -                     |
| <i>RPS6KL1</i> | rs3742785                    | C/A | 14 | 0.29 | 3714 | All | RD_only | 0.25 | 148 | R  | 0.69 | 0.36 | 1.33  | 0.2424                | 0.83 | 0.63 | 1.08  | 0.2026                |
| <i>SPTB</i>    | rs229587                     | T/C | 14 | 0.34 | 3872 | All | RD_only | 0.30 | 155 | A  | 0.82 | 0.64 | 1.05  | 0.1067                | 0.82 | 0.64 | 1.05  | 0.10252               |
| <i>YLP1</i>    | rs10139016                   | C/T | 14 | 0.25 | 3937 | All | RD_only | 0.24 | 157 | R  | 0.78 | 0.38 | 1.60  | 0.4752                | 0.78 | 0.37 | 1.61  | 0.5046                |
| <i>ADCY9</i>   | rs10775349                   | C/G | 16 | 0.20 | 3941 | All | RD_only | 0.21 | 151 | R  | 1.75 | 0.90 | 3.40  | 0.1217                | 1.90 | 0.97 | 3.71  | 0.11955               |
| <i>ADCY9</i>   | rs2230739                    | A/G | 16 | 0.09 | 3944 | All | RD_only | 0.10 | 151 | R  | 2.58 | 0.78 | 8.59  | 0.1706                | 3.13 | 0.92 | 10.67 | 0.1687                |
| <i>HBA</i>     | $\alpha^{3-7}$ -thalassaemia | I/D | 16 | 0.41 | 3946 | All | RD_only | 0.37 | 153 | D  | 0.72 | 0.52 | 0.98  | 0.0340                | 0.76 | 0.54 | 0.98  | 0.036851              |
| <i>IL4</i>     | rs2243250                    | T/C | 16 | 0.20 | 3902 | All | RD_only | 0.18 | 154 | R  | 0.45 | 0.14 | 1.42  | 0.1209                | 0.47 | 0.15 | 1.51  | 0.1230                |
| <i>ILAR</i>    | rs1805015                    | T/C | 16 | 0.42 | 3927 | All | RD_only | 0.44 | 156 | D  | 1.10 | 0.78 | 1.55  | 0.5977                | 1.12 | 0.81 | 1.56  | 0.63147               |
| <i>ADORA2B</i> | rs2535611                    | T/C | 17 | 0.10 | 3911 | All | RD_only | 0.13 | 151 | D  | 1.26 | 0.86 | 1.86  | 0.2420                | 1.28 | 0.86 | 1.89  | 0.2169                |
| <i>NOS2</i>    | rs1800482                    | G/C | 17 | 0.08 | 3922 | All | RD_only | 0.09 | 154 | R  | 1.96 | 0.46 | 8.34  | 0.4061                | 2.50 | 0.56 | 11.15 | 0.40375               |
| <i>NOS2</i>    | rs2297518                    | G/A | 17 | 0.14 | 3910 | All | RD_only | 0.14 | 149 | R  | 2.08 | 0.89 | 4.87  | 0.1234                | 2.02 | 0.85 | 4.79  | 0.1207                |
| <i>NOS2</i>    | rs8078340                    | C/T | 17 | 0.21 | 3948 | All | RD_only | 0.20 | 156 | R  | 0.15 | 0.02 | 1.04  | 0.0061                | 0.13 | 0.02 | 0.97  | 0.006273              |
| <i>NOS2</i>    | rs9282799                    | C/T | 17 | 0.03 | 3949 | All | RD_only | 0.02 | 155 | A  | 0.63 | 0.25 | 1.54  | 0.2725                | 0.66 | 0.27 | 1.62  | 0.2840                |
| <i>TBX2</i>    | rs73991577                   | A/G | 17 | 0.00 | 3937 | All | RD_only | 0.00 | 157 | H  | -    | -    | -     | -                     | -    | -    | -     | -                     |
| <i>EMR1</i>    | rs373533                     | G/T | 19 | 0.46 | 3863 | All | RD_only | 0.47 | 151 | R  | 0.99 | 0.67 | 1.47  | 0.9646                | 1.04 | 0.72 | 1.51  | 0.9102                |
| <i>EMR1</i>    | rs461645                     | C/T | 19 | 0.47 | 3933 | All | RD_only | 0.47 | 151 | D  | 1.02 | 0.71 | 1.47  | 0.9061                | 1.07 | 0.73 | 1.55  | 0.80482               |
| <i>ICAM</i>    | rs5498                       | A/G | 19 | 0.11 | 3908 | All | RD_only | 0.10 | 154 | R  | 0.44 | 0.06 | 3.19  | 0.3493                | 0.44 | 0.06 | 3.22  | 0.3534                |
| <i>GNAS</i>    | rs8386                       | C/T | 20 | 0.19 | 3944 | All | RD_only | 0.18 | 155 | H  | 0.89 | 0.63 | 1.27  | 0.5190                | 0.90 | 0.63 | 1.29  | 0.52994               |
| <i>DERL3</i>   | rs1128127                    | G/A | 22 | 0.50 | 3911 | All | RD_only | 0.47 | 156 | D  | 0.87 | 0.61 | 1.23  | 0.4269                | 0.88 | 0.61 | 1.26  | 0.3972                |
| <i>CD40LG</i>  | rs1126535                    | T/C | X  | 0.15 | 3934 | M+F | RD_only | 0.10 | 156 | D  | 0.60 | 0.38 | 0.94  | 0.0184                | 0.59 | 0.37 | 0.94  | 0.020226              |
| <i>CD40LG</i>  | rs1126535                    | T/C | X  | 0.16 | 1947 | F   | RD_only | 0.10 | 80  | A  | 0.59 | 0.35 | 0.99  | 0.0311                | 0.61 | 0.37 | 1.00  | 0.0351                |
| <i>CD40LG</i>  | rs1126535                    | C/T | X  | 0.85 | 1987 | M   | RD_only | 0.89 | 76  | HM | 1.49 | 0.71 | 3.13  | 0.2740                | 1.50 | 0.73 | 3.17  | 0.2940                |
| <i>CD40LG</i>  | rs3092945                    | T/C | X  | 0.21 | 3927 | M+F | RD_only | 0.24 | 154 | D  | 1.19 | 0.84 | 1.68  | 0.3412                | 1.15 | 0.81 | 1.64  | 0.3059                |
| <i>CD40LG</i>  | rs3092945                    | T/C | X  | 0.21 | 1942 | F   | RD_only | 0.25 | 79  | A  | 1.30 | 0.89 | 1.88  | 0.1786                | 1.32 | 0.90 | 1.89  | 0.1986                |
| <i>CD40LG</i>  | rs3092945                    | C/T | X  | 0.78 | 1985 | M   | RD_only | 0.77 | 75  | HM | 0.99 | 0.57 | 1.71  | 0.9629                | 1.00 | 0.58 | 1.72  | 0.9786                |
| <i>G6PD</i>    | rs1050828                    | C/T | X  | 0.19 | 3940 | M+F | RD_only | 0.20 | 155 | H  | 1.12 | 0.70 | 1.79  | 0.6468                | 1.05 | 0.64 | 1.70  | 0.64676               |
| <i>G6PD</i>    | rs1050828                    | C/T | X  | 0.20 | 1951 | F   | RD_only | 0.22 | 79  | A  | 1.12 | 0.75 | 1.67  | 0.5802                | 1.16 | 0.78 | 1.69  | 0.6102                |
| <i>G6PD</i>    | rs1050828                    | C/T | X  | 0.19 | 1989 | M   | RD_only | 0.18 | 76  | HM | 0.98 | 0.54 | 1.77  | 0.9503                | 0.99 | 0.57 | 1.84  | 0.9808                |
| <i>G6PD</i>    | rs1050829                    | T/C | X  | 0.40 | 3928 | M+F | RD_only | 0.38 | 155 | A  | 0.92 | 0.76 | 1.12  | 0.3931                | 0.79 | 0.51 | 1.21  | 0.4246                |
| <i>G6PD</i>    | rs1050829                    | T/C | X  | 0.41 | 1952 | F   | RD_only | 0.41 | 79  | R  | 0.96 | 0.52 | 1.77  | 0.9017                | 0.97 | 0.55 | 1.79  | 0.9617                |
| <i>G6PD</i>    | rs1050829                    | C/T | X  | 0.60 | 1976 | M   | RD_only | 0.66 | 76  | HM | 1.27 | 0.78 | 2.05  | 0.3344                | 1.29 | 0.79 | 2.08  | 0.3784                |

\* The rs8176719 polymorphism identifies blood-group O in the homozygous deletion form. The derived allele of rs8176746 identifies blood-group B. Chr = chromosome; DAF = derived allele frequency; MO = genotype model [A – additive, D – dominant, H – heterozygote, HM – hemizygous males, R – recessive] with respect to the derived allele; OR = Odds Ratio; LCI = Lower Confidence Interval (95%); UCI = Upper Confidence Interval; P = p-value using a logistic regression model as described in methods. § ORs and p-values unadjusted and adjusted for ethnic group, gender and *rs334*. Only those individuals solely having RD were included in this analysis.

**Table S11: Odds ratios for RD only for all polymorphisms investigated.**



| Gene 1    | Gene 2    | No. of cases by genotype |            |            |            |            |            | No. of controls by genotype |            |            |            |            |            | P    |
|-----------|-----------|--------------------------|------------|------------|------------|------------|------------|-----------------------------|------------|------------|------------|------------|------------|------|
|           |           | REF<br>REF               | REF<br>HET | HET<br>REF | HET<br>HET | DER<br>REF | DER<br>HET | REF<br>REF                  | REF<br>HET | HET<br>REF | HET<br>HET | DER<br>REF | DER<br>HET |      |
| HBA       | HBB       | 820                      | 16         | 994        | 22         | 250        | 13         | 1131                        | 216        | 1649       | 288        | 537        | 92         | 0.02 |
| HBA       | ABO       | 412                      | 369        | 462        | 457        | 129        | 110        | 725                         | 501        | 1058       | 753        | 342        | 250        | 0.05 |
| HBA       | LPHN2     | 720                      | 124        | 890        | 116        | 216        | 45         | 1147                        | 195        | 1615       | 322        | 533        | 101        | 0.05 |
| ARL14     | HBB       | 1680                     | 48         | 392        | 7          | 17         | 1          | 2471                        | 464        | 424        | 70         | 31         | 3          | 0.06 |
| INPP4B    | RPS6KLI   | 938                      | 826        | 89         | 64         | 0          | 1          | 1673                        | 1229       | 250        | 184        | 8          | 3          | 0.07 |
| HBA       | ARL14     | 656                      | 163        | 814        | 169        | 208        | 49         | 1026                        | 166        | 1460       | 243        | 469        | 91         | 0.07 |
| HBA       | INPP4B    | 772                      | 69         | 929        | 83         | 230        | 30         | 1188                        | 1219       | 301        | 237        | 21         | 10         | 0.07 |
| HBB       | LOC727982 | 1844                     | 278        | 44         | 13         | 7          | 4          | 2774                        | 520        | 495        | 94         | 28         | 5          | 0.08 |
| ABO       | IL10      | 694                      | 404        | 590        | 347        | 124        | 70         | 1239                        | 728        | 839        | 582        | 156        | 87         | 0.08 |
| HBB       | LPHN2     | 1844                     | 278        | 44         | 13         | 7          | 4          | 2774                        | 520        | 495        | 94         | 28         | 5          | 0.09 |
| LOC727982 | RPS6KLI   | 524                      | 426        | 435        | 396        | 71         | 70         | 1029                        | 749        | 726        | 538        | 168        | 119        | 0.11 |
| ATP2B4    | FREM3     | 895                      | 105        | 900        | 109        | 165        | 19         | 1425                        | 288        | 1434       | 312        | 342        | 69         | 0.13 |
| LOC727982 | LPHN2     | 946                      | 136        | 806        | 145        | 148        | 15         | 1764                        | 330        | 1231       | 225        | 268        | 51         | 0.13 |
| INPP4B    | LOC727982 | 980                      | 886        | 102        | 67         | 0          | 2          | 1835                        | 1260       | 275        | 195        | 6          | 7          | 0.15 |
| ATP2B4    | RPS6KLI   | 451                      | 430        | 474        | 409        | 102        | 54         | 849                         | 628        | 871        | 640        | 208        | 147        | 0.20 |
| ABO       | INPP4B    | 928                      | 102        | 901        | 69         | 183        | 13         | 1825                        | 286        | 1308       | 190        | 221        | 32         | 0.20 |
| ARL14     | IL10      | 1014                     | 648        | 239        | 145        | 14         | 4          | 1697                        | 1061       | 295        | 171        | 16         | 16         | 0.23 |
| ABO       | ATP2B4    | 474                      | 460        | 448        | 453        | 82         | 100        | 726                         | 967        | 665        | 672        | 118        | 112        | 0.29 |
| IL10      | LPHN2     | 1128                     | 163        | 690        | 117        | 82         | 16         | 1905                        | 341        | 1185       | 224        | 203        | 54         | 0.30 |
| HBA       | FREM3     | 750                      | 86         | 892        | 116        | 235        | 23         | 1129                        | 204        | 1575       | 355        | 510        | 110        | 0.35 |
| IL10      | INPP4B    | 1179                     | 113        | 752        | 57         | 83         | 15         | 1954                        | 302        | 1234       | 174        | 215        | 40         | 0.36 |
| ARL14     | INPP4B    | 1601                     | 143        | 362        | 38         | 14         | 4          | 2573                        | 370        | 420        | 77         | 30         | 4          | 0.40 |
| IL10      | RPS6KLI   | 598                      | 533        | 382        | 317        | 48         | 41         | 1108                        | 829        | 690        | 508        | 135        | 83         | 0.42 |
| ATP2B4    | HBB       | 971                      | 26         | 983        | 25         | 175        | 6          | 1487                        | 244        | 1466       | 287        | 354        | 62         | 0.44 |
| FREM3     | INPP4B    | 1910                     | 48         | 102        | 131        | 2          | 2          | 3122                        | 83         | 255        | 408        | 12         | 20         | 0.45 |
| ARL14     | LOC727982 | 855                      | 763        | 203        | 166        | 8          | 9          | 1604                        | 1083       | 261        | 197        | 16         | 15         | 0.50 |
| ATP2B4    | INPP4B    | 911                      | 95         | 932        | 81         | 172        | 12         | 1510                        | 219        | 1527       | 242        | 360        | 55         | 0.50 |
| HBA       | IL10      | 489                      | 318        | 613        | 368        | 156        | 92         | 791                         | 473        | 1112       | 712        | 366        | 232        | 0.50 |
| ARL14     | FREM3     | 1554                     | 183        | 357        | 42         | 13         | 4          | 2432                        | 488        | 392        | 102        | 18         | 4          | 0.50 |
| ABO       | HBB       | 1006                     | 26         | 957        | 25         | 192        | 5          | 1779                        | 328        | 1282       | 210        | 205        | 51         | 0.51 |
| ARL14     | ATP2B4    | 802                      | 796        | 182        | 190        | 6          | 10         | 1329                        | 1318       | 202        | 244        | 14         | 17         | 0.54 |
| IL10      | LOC727982 | 640                      | 565        | 400        | 346        | 45         | 40         | 1214                        | 851        | 777        | 514        | 128        | 101        | 0.54 |
| INPP4B    | LPHN2     | 1736                     | 271        | 164        | 24         | 1          | 1          | 2859                        | 522        | 421        | 93         | 40         | 4          | 0.56 |
| FREM3     | HBB       | 1899                     | 48         | 220        | 8          | 5          | 0          | 2716                        | 478        | 552        | 109        | 32         | 7          | 0.58 |
| FREM3     | LOC727982 | 965                      | 853        | 115        | 99         | 3          | 3          | 1744                        | 1181       | 357        | 262        | 19         | 16         | 0.65 |
| HBB       | IL10      | 1270                     | 791        | 31         | 24         | 8          | 3          | 1902                        | 1196       | 349        | 211        | 19         | 11         | 0.66 |
| FREM3     | RPS6KLI   | 914                      | 806        | 112        | 82         | 1          | 4          | 1570                        | 1177       | 331        | 233        | 26         | 8          | 0.68 |
| HBA       | RPS6KLI   | 391                      | 338        | 479        | 398        | 121        | 112        | 639                         | 498        | 985        | 683        | 311        | 234        | 0.69 |
| ARL14     | RPS6KLI   | 819                      | 705        | 185        | 161        | 6          | 10         | 1429                        | 1070       | 252        | 176        | 18         | 13         | 0.74 |
| ARL14     | LPHN2     | 1511                     | 235        | 347        | 51         | 16         | 2          | 2467                        | 471        | 428        | 67         | 26         | 8          | 0.74 |
| HBB       | INPP4B    | 1944                     | 181        | 53         | 4          | 10         | 1          | 2880                        | 421        | 503        | 87         | 24         | 13         | 0.75 |
| ABO       | RPS6KLI   | 488                      | 415        | 443        | 399        | 95         | 77         | 1042                        | 751        | 737        | 552        | 126        | 95         | 0.75 |
| FREM3     | IL10      | 1146                     | 731        | 140        | 78         | 3          | 2          | 1840                        | 1169       | 392        | 280        | 24         | 13         | 0.76 |
| ATP2B4    | LOC727982 | 488                      | 438        | 502        | 440        | 91         | 79         | 929                         | 634        | 967        | 645        | 221        | 170        | 0.76 |
| LPHN2     | RPS6KLI   | 900                      | 761        | 126        | 130        | 3          | 3          | 1625                        | 1175       | 294        | 236        | 12         | 9          | 0.86 |
| ABO       | LPHN2     | 886                      | 147        | 842        | 123        | 169        | 26         | 1756                        | 354        | 1276       | 218        | 217        | 34         | 0.86 |
| ABO       | FREM3     | 913                      | 112        | 873        | 96         | 174        | 21         | 1735                        | 355        | 1228       | 257        | 201        | 49         | 0.88 |
| HBA       | ATP2B4    | 375                      | 392        | 476        | 455        | 116        | 120        | 588                         | 605        | 876        | 874        | 276        | 294        | 0.91 |
| FREM3     | LPHN2     | 1692                     | 263        | 302        | 30         | 5          | 1          | 2694                        | 494        | 552        | 113        | 33         | 7          | 0.91 |
| HBA       | LOC727982 | 414                      | 362        | 497        | 443        | 127        | 116        | 740                         | 479        | 1046       | 744        | 336        | 242        | 0.95 |
| ATP2B4    | IL10      | 588                      | 370        | 595        | 376        | 111        | 65         | 1005                        | 620        | 1017       | 640        | 238        | 153        | 0.97 |
| ABO       | LOC727982 | 498                      | 451        | 486        | 415        | 100        | 84         | 1140                        | 792        | 815        | 554        | 141        | 92         | 0.98 |
| HBB       | RPS6KLI   | 998                      | 858        | 23         | 25         | 5          | 5          | 1639                        | 1173       | 280        | 238        | 16         | 11         | 0.99 |

REF: reference homozygote genotype; HET: Heterozygote genotype; DER: derived allele homozygote genotype. p-values were adjusted for ethnicity and gender.

**Table S12: Pairwise interactions between the polymorphisms (1 per gene) at autosomal loci at which we found significant associations in our primary analyses using the likelihood ratio approach (Main Text Table 2).**

| Gene                                 | SNP ID      | genotype | Hb   |        |       |        |                      |                      | MCV  |        |       |       |                       |                       | RBC  |        |      |      |                       |                        |
|--------------------------------------|-------------|----------|------|--------|-------|--------|----------------------|----------------------|------|--------|-------|-------|-----------------------|-----------------------|------|--------|------|------|-----------------------|------------------------|
|                                      |             |          | N    | G mean | LCL   | UCL    | P value              | Regress P*           | N    | G mean | LCL   | UCL   | P value               | Regress P*            | N    | G mean | LCL  | UCL  | P value               | Regress P*             |
| <i>ATP2B4</i>                        | rs1541255   | AA       | 1010 | 60.58  | 59.03 | 62.17  | NA                   |                      | 963  | 73.67  | 73.09 | 74.25 | NA                    |                       | 966  | 2.64   | 2.57 | 2.72 | NA                    |                        |
| <i>ATP2B4</i>                        | rs1541255   | AG       | 1016 | 62.22  | 60.63 | 63.84  | 0.33                 | 0.13                 | 969  | 73.59  | 73.01 | 74.18 | 0.98                  | 0.77                  | 969  | 2.70   | 2.63 | 2.78 | 0.49                  | 0.20                   |
| <i>ATP2B4</i>                        | rs1541255   | GG       | 185  | 63.72  | 59.97 | 67.70  | 0.29                 |                      | 176  | 73.55  | 72.20 | 74.92 | 0.99                  |                       | 177  | 2.76   | 2.59 | 2.95 | 0.44                  |                        |
| <i>IL10</i>                          | rs1800890   | AA       | 1313 | 61.33  | 59.95 | 62.74  | NA                   |                      | 1264 | 73.81  | 73.30 | 74.33 | NA                    |                       | 1264 | 2.67   | 2.60 | 2.73 | NA                    |                        |
| <i>IL10</i>                          | rs1800890   | AT       | 821  | 61.48  | 59.74 | 63.28  | 0.99                 | 0.40                 | 774  | 73.11  | 72.47 | 73.77 | 0.22                  | 0.10                  | 778  | 2.68   | 2.59 | 2.76 | 0.99                  | 0.43                   |
| <i>IL10</i>                          | rs1800890   | TT       | 99   | 58.69  | 54.02 | 63.76  | 0.57                 |                      | 92   | 73.69  | 71.81 | 75.61 | 0.99                  |                       | 92   | 2.63   | 2.40 | 2.88 | 0.94                  |                        |
| <i>LPHN2</i>                         | rs72933304  | CC       | 1912 | 61.77  | 60.62 | 62.95  | NA                   |                      | 1828 | 73.64  | 73.22 | 74.06 | NA                    |                       | 1829 | 2.68   | 2.63 | 2.74 | NA                    |                        |
| <i>LPHN2</i>                         | rs72933304  | AC       | 296  | 60.74  | 57.90 | 63.72  | 0.80                 | 0.65                 | 278  | 73.50  | 72.43 | 74.60 | 0.97                  | 0.09                  | 281  | 2.67   | 2.54 | 2.82 | 0.99                  | 0.43                   |
| <i>LPHN2</i>                         | rs72933304  | AA       | 8    | 63.64  | 47.50 | 85.10  | 0.98                 |                      | 7    | 79.81  | 72.70 | 87.50 | 0.21                  |                       | 7    | 2.65   | 1.90 | 3.69 | 1.00                  |                        |
| <i>LOC727982</i>                     | rs1371478   | CC       | 1088 | 62.43  | 60.89 | 64.01  | NA                   |                      | 1035 | 74.03  | 73.47 | 74.59 | NA                    |                       | 1037 | 2.70   | 2.63 | 2.78 | NA                    |                        |
| <i>LOC727982</i>                     | rs1371478   | CT       | 958  | 61.23  | 59.61 | 62.88  | 0.55                 | 0.03                 | 915  | 73.29  | 72.70 | 73.89 | 0.18                  | 0.05                  | 918  | 2.67   | 2.59 | 2.75 | 0.79                  | 0.15                   |
| <i>LOC727982</i>                     | rs1371478   | TT       | 163  | 58.61  | 54.94 | 62.52  | 0.17                 |                      | 156  | 72.93  | 71.52 | 74.38 | 0.35                  |                       | 156  | 2.60   | 2.42 | 2.79 | 0.56                  |                        |
| <i>ARL14</i>                         | rs75731597  | AA       | 1754 | 62.00  | 60.79 | 63.23  | NA                   |                      | 1674 | 73.68  | 73.24 | 74.12 | NA                    |                       | 1676 | 2.69   | 2.63 | 2.75 | NA                    |                        |
| <i>ARL14</i>                         | rs75731597  | AC       | 401  | 61.21  | 58.74 | 63.78  | 0.85                 | 0.19                 | 384  | 73.15  | 72.24 | 74.07 | 0.57                  | 0.006                 | 385  | 2.70   | 2.59 | 2.83 | 0.98                  | 0.02                   |
| <i>ARL14</i>                         | rs75731597  | CC       | 18   | 56.54  | 46.57 | 68.66  | 0.62                 |                      | 16   | 80.60  | 75.81 | 85.69 | 0.01                  |                       | 17   | 2.14   | 1.73 | 2.64 | 0.09                  |                        |
| <i>FREM3</i>                         | rs186873296 | AA       | 1967 | 61.36  | 60.23 | 62.51  | NA                   |                      | 1875 | 73.66  | 73.24 | 74.08 | NA                    |                       | 1876 | 2.67   | 2.62 | 2.73 | NA                    |                        |
| <i>FREM3</i>                         | rs186873296 | AG       | 233  | 62.94  | 59.63 | 66.44  | 0.66                 | 0.01                 | 222  | 73.54  | 72.34 | 74.76 | 0.98                  | 0.51                  | 225  | 2.72   | 2.56 | 2.88 | 0.84                  | 0.10                   |
| <i>FREM3</i>                         | rs186873296 | GG       | 6    | 84.39  | 60.20 | 118.10 | 0.15                 |                      | 6    | 71.46  | 64.60 | 78.90 | 0.82                  |                       | 6    | 3.08   | 2.15 | 4.41 | 0.72                  |                        |
| <i>INPP4B</i>                        | rs77389579  | GG       | 2019 | 61.40  | 60.28 | 62.53  | NA                   |                      | 1927 | 73.68  | 73.26 | 74.09 | NA                    |                       | 1928 | 2.67   | 2.62 | 2.73 | NA                    |                        |
| <i>INPP4B</i>                        | rs77389579  | GT       | 188  | 63.77  | 60.05 | 67.73  | 0.46                 | 0.16                 | 178  | 73.25  | 71.91 | 74.61 | 0.83                  | 0.07                  | 180  | 2.74   | 2.57 | 2.93 | 0.73                  | 0.18                   |
| <i>INPP4B</i>                        | rs77389579  | TT       | 2    | 56.58  | 31.50 | 101.00 | 0.96                 |                      | 2    | 62.09  | 52.10 | 73.80 | 0.13                  |                       | 2    | 2.90   | 1.55 | 5.41 | 0.96                  |                        |
| <i>ABO</i>                           | rs8176719   | Non-O    | 1178 | 57.49  | 55.95 | 59.07  | NA                   |                      | 1125 | 71.56  | 70.97 | 72.15 | NA                    |                       | 1126 | 2.54   | 2.29 | 2.44 | NA                    |                        |
| <i>ABO</i>                           | rs8176719   | O        | 1045 | 62.87  | 61.29 | 64.49  | 0.80                 | 0.35                 | 996  | 73.78  | 73.20 | 74.36 | 0.13                  | 0.08                  | 999  | 2.76   | 2.68 | 2.84 | 0.96                  | 0.45                   |
| <i>ABO</i>                           | rs8176746   | CC       | 1529 | 6.19   | 6.06  | 6.32   | NA                   |                      | 189  | 72.36  | 71.07 | 73.67 | NA                    |                       | 1458 | 2.70   | 2.64 | 2.76 | NA                    |                        |
| <i>ABO</i>                           | rs8176746   | AC       | 622  | 6.02   | 5.83  | 6.23   | 0.35                 | 0.08                 | 942  | 73.56  | 72.97 | 74.15 | 0.23                  | 0.23                  | 598  | 2.61   | 2.52 | 2.70 | 0.26                  | 0.07                   |
| <i>ABO</i>                           | rs8176746   | AA       | 76   | 5.79   | 5.27  | 6.37   | 0.37                 |                      | 996  | 73.78  | 73.20 | 74.36 | 0.13                  |                       | 73   | 2.59   | 2.34 | 2.88 | 0.74                  |                        |
| <i>HBB</i>                           | rs334       | AA       | 2159 | 61.27  | 60.20 | 62.35  | NA                   |                      | 2058 | 73.55  | 73.15 | 73.94 | NA                    |                       | 2062 | 2.67   | 2.62 | 2.72 | NA                    |                        |
| <i>HBB</i>                           | rs334       | AT       | 57   | 73.54  | 66.01 | 81.92  | 0.003                | 5.1x10 <sup>-7</sup> | 55   | 70.89  | 68.59 | 73.28 | 0.08                  | 1.0x10 <sup>-9</sup>  | 55   | 3.40   | 3.03 | 3.82 | 0.0002                | 8.57x10 <sup>-11</sup> |
| <i>HBB</i>                           | rs334       | TT       | 11   | 30.07  | 23.52 | 38.45  | 5.1x10 <sup>-8</sup> |                      | 11   | 89.56  | 83.18 | 96.44 | 6.1x10 <sup>-7</sup>  |                       | 11   | 1.13   | 0.87 | 1.46 | 4.3x10 <sup>-10</sup> |                        |
| <i>RPS6KLI</i>                       | rs3742785   | CC       | 1032 | 62.86  | 61.26 | 64.50  | NA                   |                      | 985  | 73.54  | 72.97 | 74.12 | NA                    |                       | 987  | 2.71   | 2.64 | 2.79 | NA                    |                        |
| <i>RPS6KLI</i>                       | rs3742785   | CA       | 896  | 59.98  | 58.35 | 61.67  | 0.04                 | 0.001                | 855  | 73.73  | 73.12 | 74.36 | 0.90                  | 0.24                  | 857  | 2.63   | 2.55 | 2.71 | 0.28                  | 0.01                   |
| <i>RPS6KLI</i>                       | rs3742785   | AA       | 187  | 57.98  | 54.57 | 61.60  | 0.04                 |                      | 176  | 74.34  | 72.97 | 75.73 | 0.55                  |                       | 176  | 2.50   | 2.34 | 2.67 | 0.06                  |                        |
| $\alpha$ <sup>-3.7</sup> thalassemia |             | Norm     | 853  | 61.12  | 59.43 | 62.87  | NA                   |                      | 819  | 76.78  | 76.16 | 77.41 | NA                    |                       | 819  | 2.54   | 2.46 | 2.61 | NA                    |                        |
| $\alpha$ <sup>-3.7</sup> thalassemia |             | Het      | 1026 | 62.23  | 60.66 | 63.85  | 0.62                 |                      | 974  | 72.88  | 72.34 | 73.43 | 5.4x10 <sup>-11</sup> | 8.3x10 <sup>-61</sup> | 975  | 2.72   | 2.65 | 2.80 | 0.002                 |                        |
| $\alpha$ <sup>-3.7</sup> thalassemia |             | Hom      | 264  | 62.16  | 59.09 | 65.38  | 0.84                 | 0.49                 | 252  | 66.80  | 65.82 | 67.78 | 5.4x10 <sup>-11</sup> |                       | 254  | 3.03   | 2.87 | 3.20 | 6.6x10 <sup>-8</sup>  | 1.11x10 <sup>-10</sup> |
| <i>CD40LG</i> <sup>§</sup>           | rs3092945   | TT       | 1459 | 61.93  | 60.61 | 63.28  | NA                   |                      | 1390 | 73.48  | 73.00 | 73.97 | NA                    |                       | 1392 | 2.70   | 2.64 | 2.76 | NA                    |                        |
| <i>CD40LG</i>                        | rs3092945   | TC       | 388  | 60.00  | 57.55 | 62.56  | 0.38                 | 0.12                 | 366  | 74.66  | 73.70 | 75.63 | 0.08                  | 0.28                  | 369  | 2.56   | 2.45 | 2.68 | 0.12                  | 0.28                   |
| <i>CD40LG</i> <sup>§</sup>           | rs3092945   | CC       | 379  | 60.52  | 58.02 | 63.13  | 0.61                 |                      | 367  | 72.75  | 71.82 | 73.70 | 0.37                  |                       | 366  | 2.68   | 2.56 | 2.81 | 0.97                  |                        |
| <i>G6PD</i> <sup>§</sup>             | rs1050828   | CC       | 1643 | 61.93  | 60.68 | 63.20  | NA                   |                      | 1574 | 73.17  | 72.71 | 73.62 | NA                    |                       | 1575 | 2.71   | 2.65 | 2.77 | NA                    |                        |
| <i>G6PD</i>                          | rs1050828   | CT       | 306  | 61.76  | 58.92 | 64.74  | 0.99                 | 0.001                | 286  | 75.12  | 74.03 | 76.23 | 0.003                 | 0.003                 | 288  | 2.58   | 2.45 | 2.72 | 0.20                  | 0.01                   |
| <i>G6PD</i> <sup>§</sup>             | rs1050828   | TT       | 271  | 57.04  | 54.26 | 59.97  | 0.008                |                      | 257  | 74.33  | 73.19 | 75.48 | 0.15                  |                       | 258  | 2.53   | 2.39 | 2.67 | 0.06                  |                        |

Only those polymorphisms with the most significant associations with severe malaria phenotypes (main text Table 2) were analysed with red blood cell indices.

N = number of individuals; G mean = geometric mean; LCL = lower confidence level (95%), UCL = upper confidence level (95%); HB = haemoglobin (g/l); MCV = mean cell volume (fL); RBC = red blood cell count ( $\times 10^{12}/l$ ); P value; Regress P = adjusted for gender, age, rs334 and ethnicity using linear regression. <sup>§</sup>Hemizygous males are coded as homozygotes.

**Table S13: Association of Red Blood Cell indices for all severe malaria cases.**

| Gene      | SNPID                         | *Individual loci        |                    |                         |                    |                         |                    | §Combined - 13 loci |                    |                    |
|-----------|-------------------------------|-------------------------|--------------------|-------------------------|--------------------|-------------------------|--------------------|---------------------|--------------------|--------------------|
|           |                               | Observed scale          |                    | Logit scale             |                    | Probit scale            |                    | Observed scale      | Logit scale        | Probit scale       |
|           |                               | Case-control population | General population | Case-control population | General population | Case-control population | General population | General population  | General population | General population |
| HBB       | rs334                         | 0.0390                  | 0.0282             | 0.0361                  | 0.0334             | 0.0361                  | 0.0033             | 0.0295              | 0.0354             | 0.0354             |
| FREM3     | rs186873296                   | 0.0098                  | 0.0071             | 0.0080                  | 0.0078             | 0.0080                  | 0.0334             | 0.0064              | 0.0076             | 0.0076             |
| FREM3     | rs186790584                   | 0.0092                  | 0.0066             | 0.0074                  | 0.0073             | 0.0074                  | 0.0078             |                     |                    |                    |
| FREM3     | rs149914432                   | 0.0089                  | 0.0064             | 0.0072                  | 0.0071             | 0.0072                  | 0.0073             |                     |                    |                    |
| ABO       | rs8176746                     | 0.0065                  | 0.0047             | 0.0049                  | 0.0048             | 0.0049                  | 0.0071             | 0.0041              | 0.0044             | 0.0045             |
| ABO       | rs8176719                     | 0.0061                  | 0.0044             | 0.0046                  | 0.0046             | 0.0046                  | 0.0048             | 0.0011              | 0.0012             | 0.0011             |
| INPP4B    | rs77389579                    | 0.0055                  | 0.0040             | 0.0044                  | 0.0044             | 0.0044                  | 0.0046             | 0.0001              | 0.0003             | 0.0003             |
| HBA       | $\alpha^{-3.7}$ -thalassaemia | 0.0042                  | 0.0031             | 0.0033                  | 0.0033             | 0.0033                  | 0.0044             | 0.0021              | 0.0023             | 0.0022             |
| INPP4B    | rs13103597                    | 0.0034                  | 0.0025             | 0.0026                  | 0.0026             | 0.0026                  | 0.0026             |                     |                    |                    |
| LOC727982 | rs1371478                     | 0.0033                  | 0.0024             | 0.0025                  | 0.0025             | 0.0025                  | 0.0025             | 0.0027              | 0.0030             | 0.0029             |
| LOC727982 | rs1371474                     | 0.0031                  | 0.0023             | 0.0024                  | 0.0024             | 0.0024                  | 0.0024             |                     |                    |                    |
| ARL14     | rs75731597                    | 0.0031                  | 0.0022             | 0.0023                  | 0.0023             | 0.0023                  | 0.0023             | 0.0019              | 0.0021             | 0.0020             |
| ARL14     | rs74954675                    | 0.0026                  | 0.0019             | 0.0020                  | 0.0019             | 0.0020                  | 0.0019             |                     |                    |                    |
| ARL14     | rs76033371                    | 0.0025                  | 0.0018             | 0.0019                  | 0.0018             | 0.0019                  | 0.0018             |                     |                    |                    |
| IL10      | rs1800890                     | 0.0018                  | 0.0013             | 0.0015                  | 0.0015             | 0.0015                  | 0.0015             | 0.0013              | 0.0015             | 0.0015             |
| IL10      | rs3024500                     | 0.0018                  | 0.0013             | 0.0013                  | 0.0013             | 0.0013                  | 0.0013             |                     |                    |                    |
| RPS6KL1   | rs3742785                     | 0.0016                  | 0.0012             | 0.0012                  | 0.0012             | 0.0012                  | 0.0012             | 0.0008              | 0.0009             | 0.0009             |
| EMR1      | rs373533                      | 0.0015                  | 0.0011             | 0.0012                  | 0.0012             | 0.0012                  | 0.0012             | 0.0012              | 0.0013             | 0.0014             |
| EMR1      | rs461645                      | 0.0014                  | 0.0010             | 0.0011                  | 0.0011             | 0.0011                  | 0.0011             |                     |                    |                    |
| LPHN2     | rs72933304                    | 0.0014                  | 0.0010             | 0.0011                  | 0.0011             | 0.0011                  | 0.0011             | 0.0007              | 0.0008             | 0.0008             |
| ATP2B4    | rs55868763                    | 0.0013                  | 0.0010             | 0.0010                  | 0.0010             | 0.0010                  | 0.0010             | 0.0007              | 0.0007             | 0.0008             |
| ATP2B4    | rs1541255                     | 0.0013                  | 0.0010             | 0.0010                  | 0.0010             | 0.0010                  | 0.0010             | <b>Total</b>        | <b>0.0525</b>      | <b>0.0571</b>      |
| USP38     | rs28459062                    | 0.0013                  | 0.0010             | 0.0010                  | 0.0010             | 0.0010                  | 0.0010             |                     |                    |                    |
| IL1A      | rs17561                       | 0.0013                  | 0.0010             | 0.0010                  | 0.0010             | 0.0010                  | 0.0010             |                     |                    |                    |
| LPHN2     | rs4650365                     | 0.0012                  | 0.0009             | 0.0009                  | 0.0009             | 0.0009                  | 0.0009             |                     |                    |                    |
| ATP2B4    | rs10900585                    | 0.0012                  | 0.0009             | 0.0009                  | 0.0009             | 0.0009                  | 0.0009             |                     |                    |                    |
| DERL3     | rs1128127                     | 0.0012                  | 0.0009             | 0.0009                  | 0.0009             | 0.0009                  | 0.0009             |                     |                    |                    |
| ATP2B4    | rs4951074                     | 0.0011                  | 0.0008             | 0.0009                  | 0.0009             | 0.0009                  | 0.0009             |                     |                    |                    |
| TRIM5     | rs7935564                     | 0.0011                  | 0.0008             | 0.0008                  | 0.0008             | 0.0008                  | 0.0008             |                     |                    |                    |
| LOC727982 | rs10188961                    | 0.0010                  | 0.0007             | 0.0008                  | 0.0008             | 0.0008                  | 0.0008             |                     |                    |                    |
| IL20RA    | rs1555498                     | 0.0010                  | 0.0007             | 0.0008                  | 0.0008             | 0.0008                  | 0.0008             |                     |                    |                    |
| GBP7      | rs1803632                     | 0.0010                  | 0.0007             | 0.0008                  | 0.0008             | 0.0008                  | 0.0008             |                     |                    |                    |
| IL22      | rs2227485                     | 0.0010                  | 0.0007             | 0.0008                  | 0.0008             | 0.0008                  | 0.0008             |                     |                    |                    |
| TLR4      | rs4986790                     | 0.0007                  | 0.0005             | 0.0007                  | 0.0007             | 0.0007                  | 0.0007             |                     |                    |                    |
| IRF1      | rs2706384                     | 0.0009                  | 0.0007             | 0.0007                  | 0.0007             | 0.0007                  | 0.0007             |                     |                    |                    |
| GRIP1     | rs1394263                     | 0.0010                  | 0.0007             | 0.0007                  | 0.0007             | 0.0007                  | 0.0007             |                     |                    |                    |
| LPHN2     | rs72933350                    | 0.0009                  | 0.0007             | 0.0007                  | 0.0007             | 0.0007                  | 0.0007             |                     |                    |                    |
| IL4       | rs2243250                     | 0.0009                  | 0.0007             | 0.0007                  | 0.0007             | 0.0007                  | 0.0007             |                     |                    |                    |
| HSPA1B    | rs6457452                     | 0.0009                  | 0.0006             | 0.0007                  | 0.0007             | 0.0007                  | 0.0007             |                     |                    |                    |
| ADCY9     | rs2230739                     | 0.0008                  | 0.0006             | 0.0006                  | 0.0006             | 0.0006                  | 0.0006             |                     |                    |                    |
| LPHN2     | rs72933310                    | 0.0008                  | 0.0006             | 0.0006                  | 0.0006             | 0.0006                  | 0.0006             |                     |                    |                    |
| CAND1     | rs1566830                     | 0.0008                  | 0.0006             | 0.0006                  | 0.0006             | 0.0006                  | 0.0006             |                     |                    |                    |
| IL22      | rs2227491                     | 0.0008                  | 0.0006             | 0.0006                  | 0.0006             | 0.0006                  | 0.0006             |                     |                    |                    |
| IL22      | rs1012356                     | 0.0008                  | 0.0006             | 0.0006                  | 0.0006             | 0.0006                  | 0.0006             |                     |                    |                    |
| PLEKHG1   | rs141555199                   | 0.0007                  | 0.0005             | 0.0006                  | 0.0006             | 0.0006                  | 0.0006             |                     |                    |                    |
| ADORA2B   | rs2535611                     | 0.0007                  | 0.0005             | 0.0005                  | 0.0005             | 0.0005                  | 0.0005             |                     |                    |                    |
| GNAS      | rs8386                        | 0.0007                  | 0.0005             | 0.0005                  | 0.0005             | 0.0005                  | 0.0005             |                     |                    |                    |
| PLEKHG1   | rs55958968                    | 0.0007                  | 0.0005             | 0.0005                  | 0.0005             | 0.0005                  | 0.0005             |                     |                    |                    |
| CAND1     | rs10459266                    | 0.0007                  | 0.0005             | 0.0005                  | 0.0005             | 0.0005                  | 0.0005             |                     |                    |                    |
| IL1B      | rs1143634                     | 0.0006                  | 0.0004             | 0.0005                  | 0.0005             | 0.0005                  | 0.0005             |                     |                    |                    |
| TBX2      | rs73991577                    | 0.0005                  | 0.0004             | 0.0005                  | 0.0005             | 0.0005                  | 0.0005             |                     |                    |                    |
| TLR1      | rs4833095                     | 0.0006                  | 0.0004             | 0.0004                  | 0.0004             | 0.0004                  | 0.0004             |                     |                    |                    |
| IL10      | rs1800896                     | 0.0005                  | 0.0004             | 0.0004                  | 0.0004             | 0.0004                  | 0.0004             |                     |                    |                    |
| NOS2      | rs9282799                     | 0.0005                  | 0.0004             | 0.0004                  | 0.0004             | 0.0004                  | 0.0004             |                     |                    |                    |
| AJAP1     | rs6674631                     | 0.0005                  | 0.0004             | 0.0004                  | 0.0004             | 0.0004                  | 0.0004             |                     |                    |                    |
| NOS2      | rs8078340                     | 0.0005                  | 0.0004             | 0.0004                  | 0.0004             | 0.0004                  | 0.0004             |                     |                    |                    |
| CR1       | rs17047660                    | 0.0005                  | 0.0004             | 0.0004                  | 0.0004             | 0.0004                  | 0.0004             |                     |                    |                    |
| ICAM      | rs5498                        | 0.0005                  | 0.0003             | 0.0004                  | 0.0004             | 0.0004                  | 0.0004             |                     |                    |                    |
| TPTE2     | rs182873742                   | 0.0004                  | 0.0003             | 0.0003                  | 0.0003             | 0.0003                  | 0.0003             |                     |                    |                    |
| TNF       | rs1800629                     | 0.0004                  | 0.0003             | 0.0003                  | 0.0003             | 0.0003                  | 0.0003             |                     |                    |                    |
| RTN3      | rs542998                      | 0.0004                  | 0.0003             | 0.0003                  | 0.0003             | 0.0003                  | 0.0003             |                     |                    |                    |
| IL17RD    | rs6780995                     | 0.0003                  | 0.0002             | 0.0002                  | 0.0002             | 0.0002                  | 0.0002             |                     |                    |                    |
| CAND1     | rs12307123                    | 0.0003                  | 0.0002             | 0.0002                  | 0.0002             | 0.0002                  | 0.0002             |                     |                    |                    |
| PLEKHG1   | rs114726617                   | 0.0003                  | 0.0002             | 0.0002                  | 0.0002             | 0.0002                  | 0.0002             |                     |                    |                    |
| TLR6      | rs5743810                     | 0.0002                  | 0.0001             | 0.0002                  | 0.0002             | 0.0002                  | 0.0002             |                     |                    |                    |
| PLEKHG1   | rs142712208                   | 0.0003                  | 0.0002             | 0.0002                  | 0.0002             | 0.0002                  | 0.0002             |                     |                    |                    |
| PLEKHG1   | rs2131263                     | 0.0003                  | 0.0002             | 0.0002                  | 0.0002             | 0.0002                  | 0.0002             |                     |                    |                    |
| AJAP1     | kgp15825649                   | 0.0003                  | 0.0002             | 0.0002                  | 0.0002             | 0.0002                  | 0.0002             |                     |                    |                    |
| MKI67     | rs115947774                   | 0.0003                  | 0.0002             | 0.0002                  | 0.0002             | 0.0002                  | 0.0002             |                     |                    |                    |
| TNF       | rs361525                      | 0.0003                  | 0.0002             | 0.0002                  | 0.0002             | 0.0002                  | 0.0002             |                     |                    |                    |
| CTLA      | rs2242665                     | 0.0002                  | 0.0002             | 0.0002                  | 0.0002             | 0.0002                  | 0.0002             |                     |                    |                    |
| TNF       | rs1800750                     | 0.0002                  | 0.0001             | 0.0002                  | 0.0002             | 0.0002                  | 0.0002             |                     |                    |                    |
| TNF       | rs3093662                     | 0.0002                  | 0.0002             | 0.0002                  | 0.0002             | 0.0002                  | 0.0002             |                     |                    |                    |
| TLR6      | rs5743809                     | 0.0002                  | 0.0002             | 0.0002                  | 0.0002             | 0.0002                  | 0.0002             |                     |                    |                    |
| SDCI      | rs11899121                    | 0.0002                  | 0.0002             | 0.0002                  | 0.0002             | 0.0002                  | 0.0002             |                     |                    |                    |
| LTA       | rs2239704                     | 0.0002                  | 0.0002             | 0.0002                  | 0.0002             | 0.0002                  | 0.0002             |                     |                    |                    |
| IL13      | rs20541                       | 0.0002                  | 0.0001             | 0.0002                  | 0.0002             | 0.0002                  | 0.0002             |                     |                    |                    |
| TLR9      | rs187084                      | 0.0002                  | 0.0001             | 0.0002                  | 0.0002             | 0.0002                  | 0.0002             |                     |                    |                    |
| SNORD48   | rs116288147                   | 0.0002                  | 0.0001             | 0.0001                  | 0.0001             | 0.0001                  | 0.0001             |                     |                    |                    |
| ILAR      | rs1805015                     | 0.0002                  | 0.0001             | 0.0001                  | 0.0001             | 0.0001                  | 0.0001             |                     |                    |                    |

|                 |             |        |        |        |        |        |        |
|-----------------|-------------|--------|--------|--------|--------|--------|--------|
| <i>PLEKHG1</i>  | rs15116938  | 0.0002 | 0.0001 | 0.0001 | 0.0001 | 0.0001 | 0.0001 |
| <i>RRM1</i>     | kgp12768002 | 0.0001 | 0.0001 | 0.0001 | 0.0001 | 0.0001 | 0.0001 |
| <i>CR1</i>      | rs17047661  | 0.0002 | 0.0001 | 0.0001 | 0.0001 | 0.0001 | 0.0001 |
| <i>SPTB</i>     | rs229587    | 0.0002 | 0.0001 | 0.0001 | 0.0001 | 0.0001 | 0.0001 |
| <i>PLEKHG1</i>  | rs76924464  | 0.0001 | 0.0001 | 0.0001 | 0.0001 | 0.0001 | 0.0001 |
| <i>PLEKHG1</i>  | rs151293197 | 0.0001 | 0.0001 | 0.0001 | 0.0001 | 0.0001 | 0.0001 |
| <i>PLEKHG1</i>  | rs79100774  | 0.0001 | 0.0001 | 0.0001 | 0.0001 | 0.0001 | 0.0001 |
| <i>LTA</i>      | rs909253    | 0.0001 | 0.0001 | 0.0001 | 0.0001 | 0.0001 | 0.0001 |
| <i>MKI67</i>    | rs148494166 | 0.0001 | 0.0001 | 0.0001 | 0.0001 | 0.0001 | 0.0001 |
| <i>NOS2</i>     | rs1800482   | 0.0001 | 0.0001 | 0.0001 | 0.0001 | 0.0001 | 0.0001 |
| <i>MKI67</i>    | rs11016116  | 0.0001 | 0.0001 | 0.0001 | 0.0001 | 0.0001 | 0.0001 |
| <i>ABO</i>      | rs8176750   | 0.0001 | 0.0001 | 0.0001 | 0.0001 | 0.0001 | 0.0001 |
| <i>HCG4</i>     | rs114980857 | 0.0001 | 0.0001 | 0.0001 | 0.0001 | 0.0001 | 0.0001 |
| <i>TNF</i>      | rs1799964   | 0.0001 | 0.0001 | 0.0001 | 0.0001 | 0.0001 | 0.0001 |
| <i>B3GALNT1</i> | rs12107243  | 0.0001 | 0.0001 | 0.0001 | 0.0001 | 0.0001 | 0.0001 |
| <i>CD36</i>     | rs3211938   | 0.0001 | 0.0000 | 0.0001 | 0.0001 | 0.0001 | 0.0001 |
| <i>LPHN2</i>    | rs146428334 | 0.0001 | 0.0000 | 0.0000 | 0.0000 | 0.0000 | 0.0000 |
| <i>IL17RE</i>   | rs708567    | 0.0001 | 0.0000 | 0.0000 | 0.0000 | 0.0000 | 0.0000 |
| <i>NOS2</i>     | rs2297518   | 0.0001 | 0.0000 | 0.0000 | 0.0000 | 0.0000 | 0.0000 |
| <i>IL22</i>     | rs2227478   | 0.0000 | 0.0000 | 0.0000 | 0.0000 | 0.0000 | 0.0000 |
| <i>ATP2B4</i>   | rs3753036   | 0.0000 | 0.0000 | 0.0000 | 0.0000 | 0.0000 | 0.0000 |
| <i>NOD1</i>     | rs2075820   | 0.0000 | 0.0000 | 0.0000 | 0.0000 | 0.0000 | 0.0000 |
| <i>ABO</i>      | rs56390333  | 0.0000 | 0.0000 | 0.0000 | 0.0000 | 0.0000 | 0.0000 |
| <i>IL22</i>     | rs2227507   | 0.0000 | 0.0000 | 0.0000 | 0.0000 | 0.0000 | 0.0000 |
| <i>GABBR1</i>   | rs192151845 | 0.0000 | 0.0000 | 0.0000 | 0.0000 | 0.0000 | 0.0000 |
| <i>GAB1</i>     | rs7663712   | 0.0000 | 0.0000 | 0.0000 | 0.0000 | 0.0000 | 0.0000 |
| <i>FREM3</i>    | rs184895969 | 0.0000 | 0.0000 | 0.0000 | 0.0000 | 0.0000 | 0.0000 |
| <i>C6</i>       | rs1801033   | 0.0000 | 0.0000 | 0.0000 | 0.0000 | 0.0000 | 0.0000 |
| <i>ADCY9</i>    | rs10775349  | 0.0000 | 0.0000 | 0.0000 | 0.0000 | 0.0000 | 0.0000 |
| <i>FREM3</i>    | rs184908374 | 0.0000 | 0.0000 | 0.0000 | 0.0000 | 0.0000 | 0.0000 |
| <i>DARC</i>     | rs2814778   | 0.0000 | 0.0000 | 0.0000 | 0.0000 | 0.0000 | 0.0000 |
| <i>TLR4</i>     | rs4986791   | 0.0000 | 0.0000 | 0.0000 | 0.0000 | 0.0000 | 0.0000 |

\*Estimates are the proportion of the total variance explained by each polymorphism individually when estimated on the scale shown ("Observed" where computed on the 0-1 scale and transformed to the underlying liability scale; "Logit" and "Probit" where computed using the logit and probit transformations to model them on the liability scale). Estimates from the case-control data ("Case-control") are inflated due to ascertainment bias and thus are adjusted to give the values expected in the general population ("General"). Estimates are missing for markers that had <5 genotypes carrying the minor allele. The model here included sex as a fixed effect but not ethnic group. When ethnic group was included, the estimates decreased by a factor of 0.91 on average. §Estimates when simultaneously fitting the most significant SNP for each of 12 genes explaining the most amount of variance individually under the logit model. Two SNPs for the ABO locus are included because they independently explained significant amounts of variance. The total variance explained by these 13 markers is shown in bold below these with adjustment for ascertainment bias.

**Table S14: Proportions of variance explained by individual markers**

|                                |    | BlpI RFLP assay for the<br>Dantu hybrid gene |                |             |
|--------------------------------|----|----------------------------------------------|----------------|-------------|
|                                |    | Non-Dantu                                    | Dantu positive | Total       |
| iPLEX assay for<br>rs186873296 | AA | 1685*                                        | 13             | <b>1698</b> |
|                                | AG | 17                                           | 213*           | <b>230</b>  |
|                                | GG | 1                                            | 9*             | <b>10</b>   |
| <b>Total</b>                   |    | <b>1703</b>                                  | <b>235</b>     | <b>1938</b> |

All severe malaria cases (n=2244) were genotyped for the Dantu hybrid gene; data are shown for samples with both a valid rs186873296 and Dantu result. The BlpI RFLP assay does not distinguish readily between heterozygous and homozygous states for Dantu. RFLP=restriction fragment length polymorphism. \*Concordant data between assays.

**Table S15: Concordance between iPLEX assay for rs186873296 and the BlpI RFLP assay for the Dantu hybrid in paediatric cases of severe malaria**

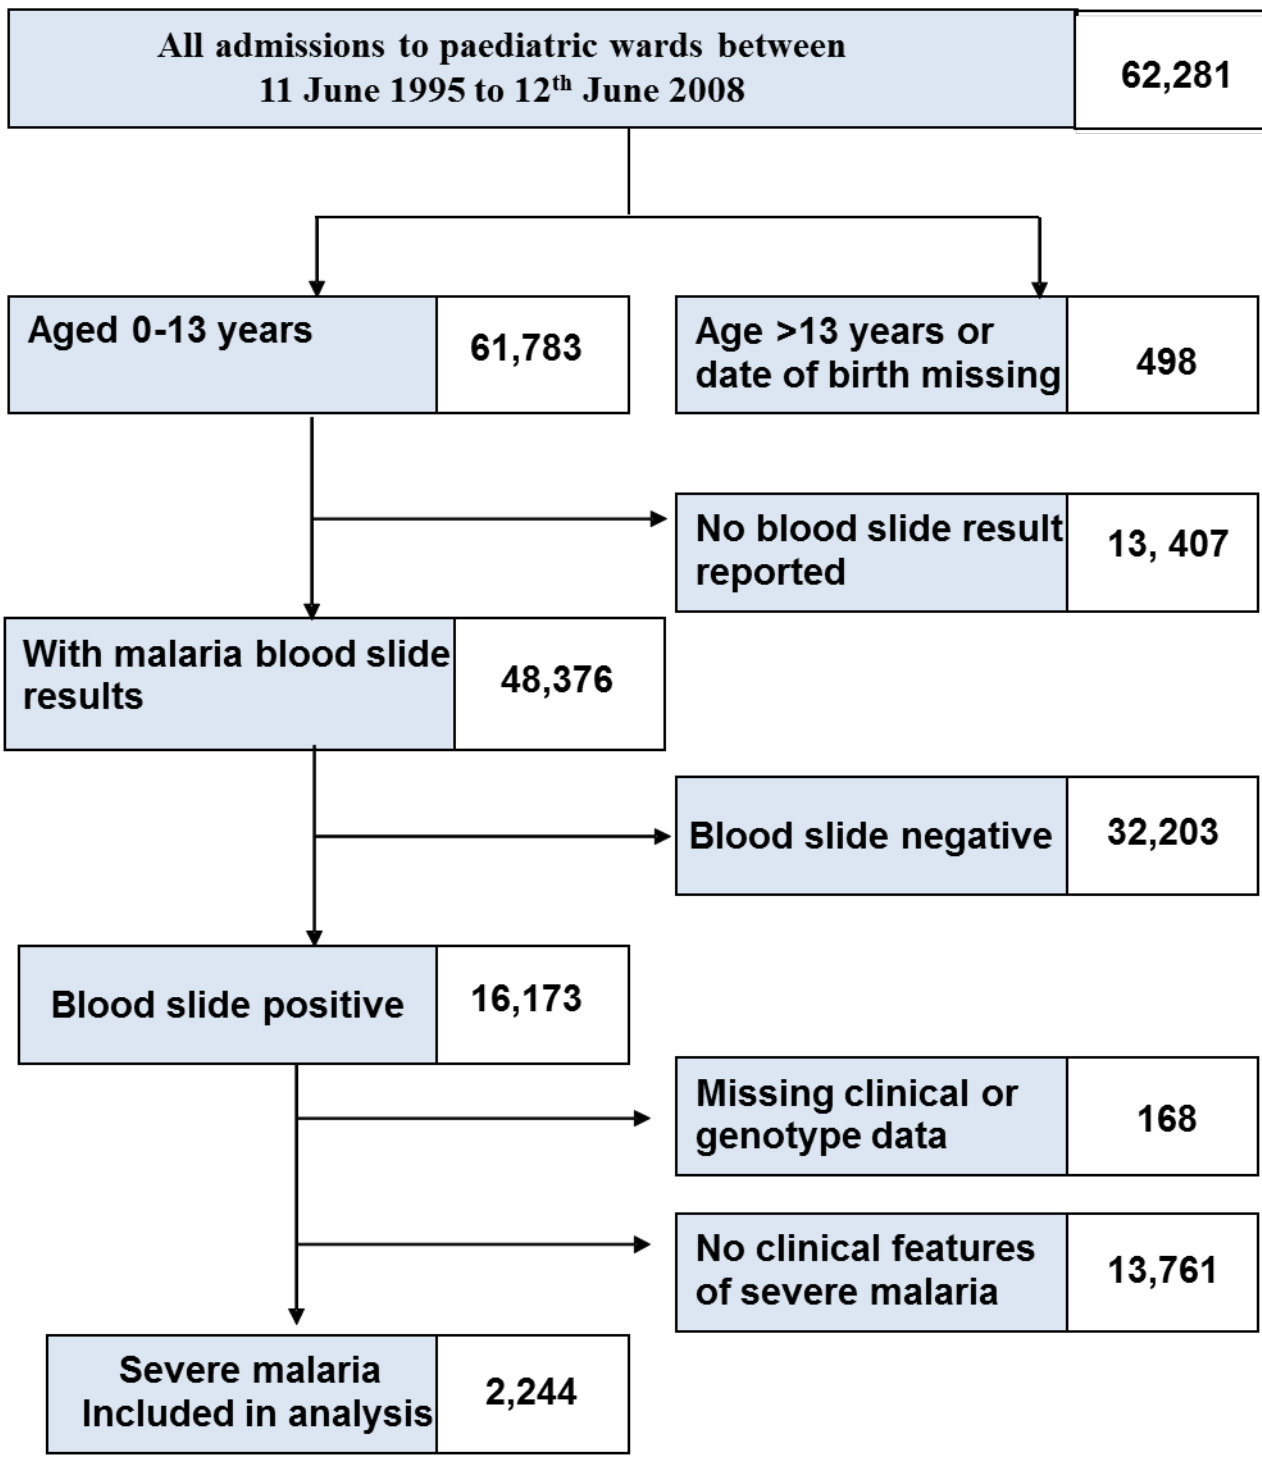

Figure S1: Flow diagram showing the selection of severe malaria cases.

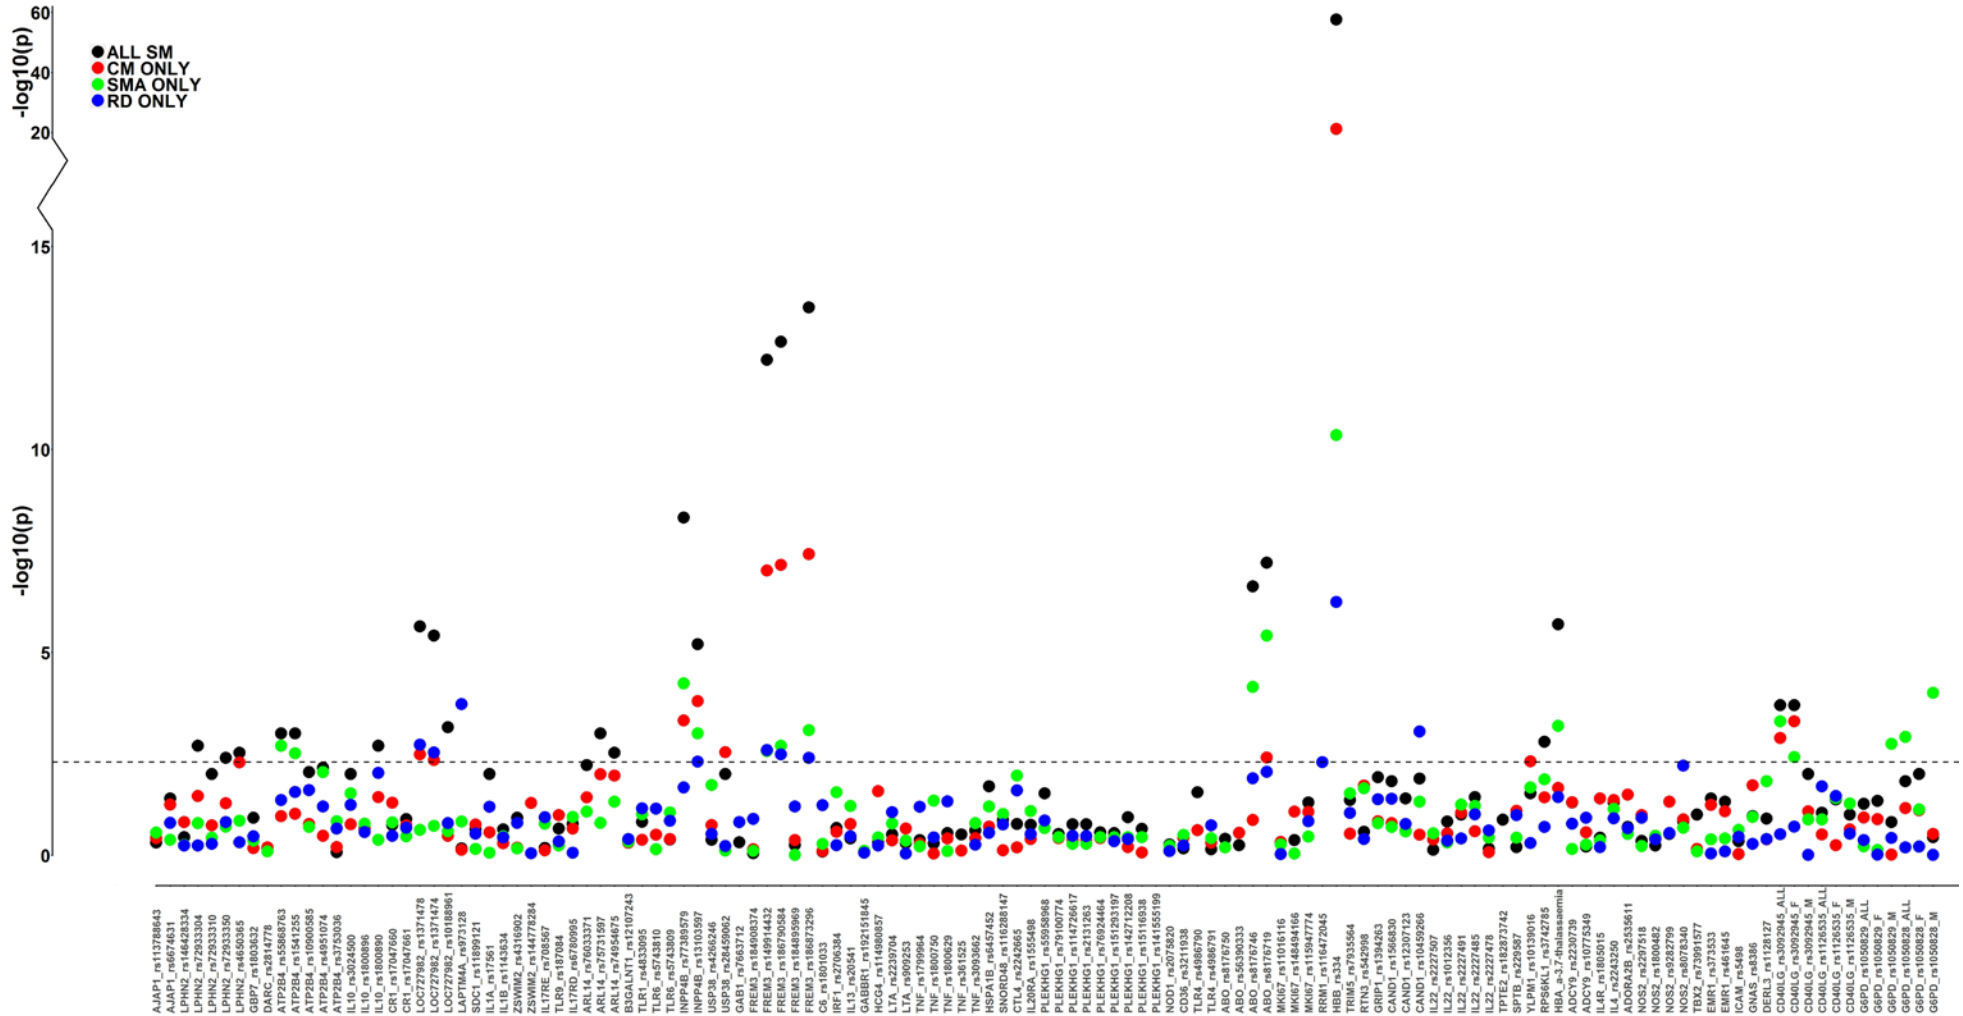

**Figure S2. Manhattan plot showing the distribution of p-values for association tests with severe malaria phenotypes.**

All SM; all individuals with any severe malaria phenotype; CM, cerebral malaria only; SMA, severe malaria anaemia only; RD, respiratory distress only. We tested for associations using additive (A), dominant (D), heterozygous (H), hemizygous (HM) and recessive (R) genetic models and the minimum p-value (as  $-\log_{10}[p]$ ) for each polymorphism across the models is shown. Analyses were adjusted for gender, ethnic group and rs334 genotype. The dashed horizontal line represents the significance threshold of  $p < 0.005$  determined by permutation testing (see methods). Polymorphisms tested are listed in chromosomal order (see Supplementary Table 1 for details).

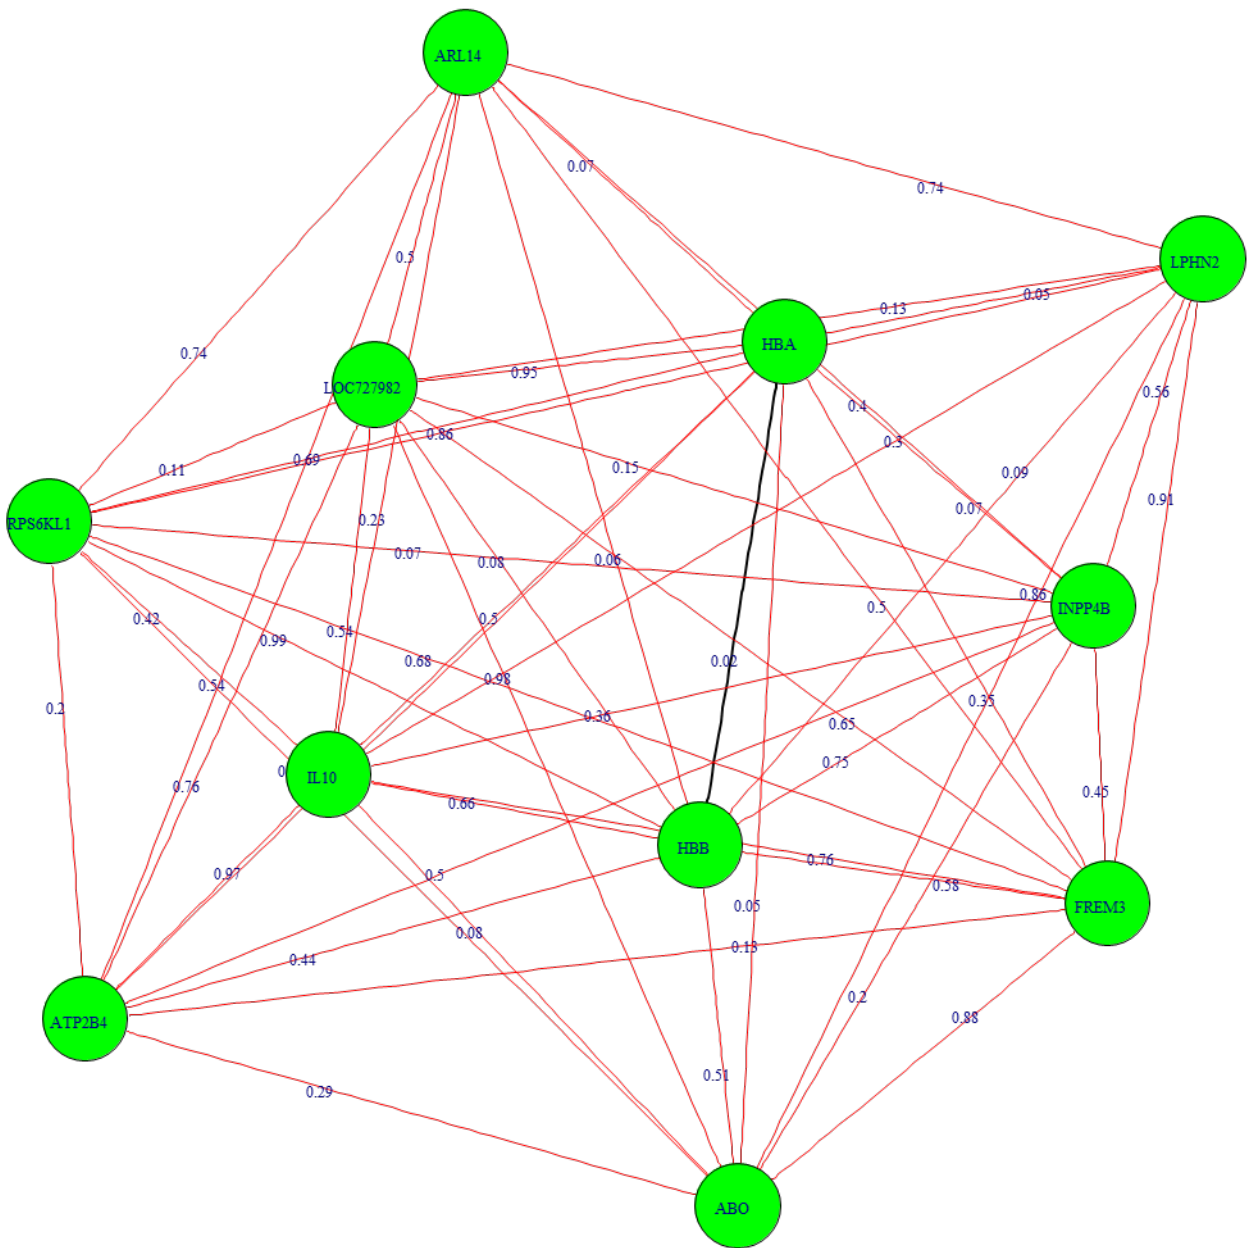

The figure shows a graphical representation of the data in Supplementary Table S12. The polymorphisms used for the pairwise interaction analysis were those shown in the main text Table 2. The nodes in the figure are labelled according with the gene name for the polymorphisms. The lines connecting the nodes show the p-values for the interactions. p-values were adjusted for ethnicity and gender.

**Figure S3: Network diagram for interaction of polymorphim pairs in severe malaria.**



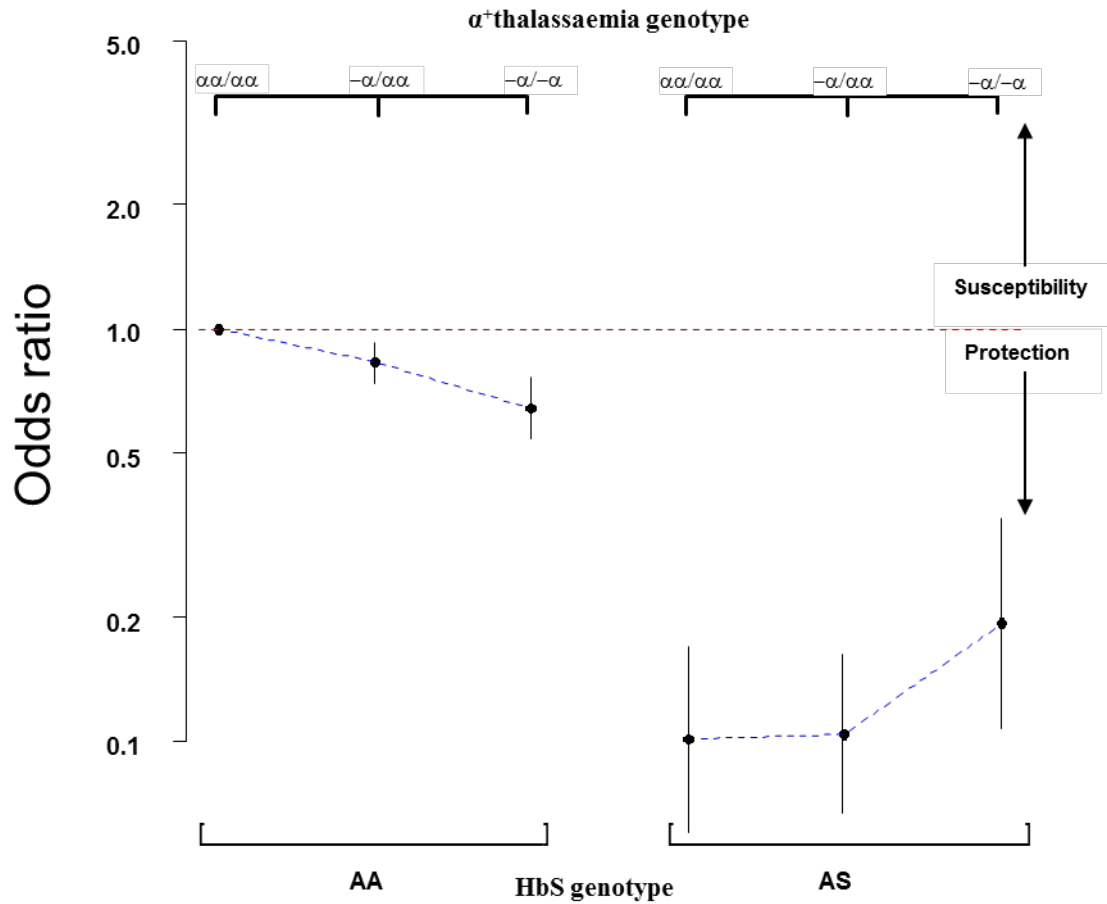

| Allele group | a    | b     | c                    | d                     | e                     | f                    |
|--------------|------|-------|----------------------|-----------------------|-----------------------|----------------------|
| Cases        | 828  | 1002  | 252                  | 16                    | 22                    | 13                   |
| Controls     | 1131 | 1649  | 537                  | 216                   | 288                   | 92                   |
| P-value      | ref  | 0.002 | $5.8 \times 10^{-7}$ | $3.1 \times 10^{-18}$ | $1.4 \times 10^{-23}$ | $4.0 \times 10^{-8}$ |

For each combination of genotypes (x-axis), we computed the odds ratio  $\pm$  95% CI (y-axis) and p-value relative to the reference group ( $\alpha^+$ thalassaemia:  $\alpha\alpha/\alpha\alpha/\text{HbAA}$ ). The red line shows the point of no effect. The odds ratio has been plotted on a log scale so that the distances above and below 1 represent the same size of effect although opposite effect. We also list the sample size for cases and controls. Allele group “a” shows the baseline for normal  $\alpha^+$ thalassaemia and HbAA. As shown in allele groups “a”, “b” and “c”, on a normal HbAA background,  $\alpha^+$ thalassaemia tends to protect reaching an OR of 0.6 in the homozygote state. However, this trend for protection is not seen in individuals with HbAS, indeed the  $\alpha^+$ thalassaemia locus reduces the effect of HbAS (OR 0.1 to 0.2).

**Figure S4: Two-way epistatic interactions between rs334 (HbS) and  $\alpha^{3.7}$ -thalassaemia for all severe malaria cases.**

**A**

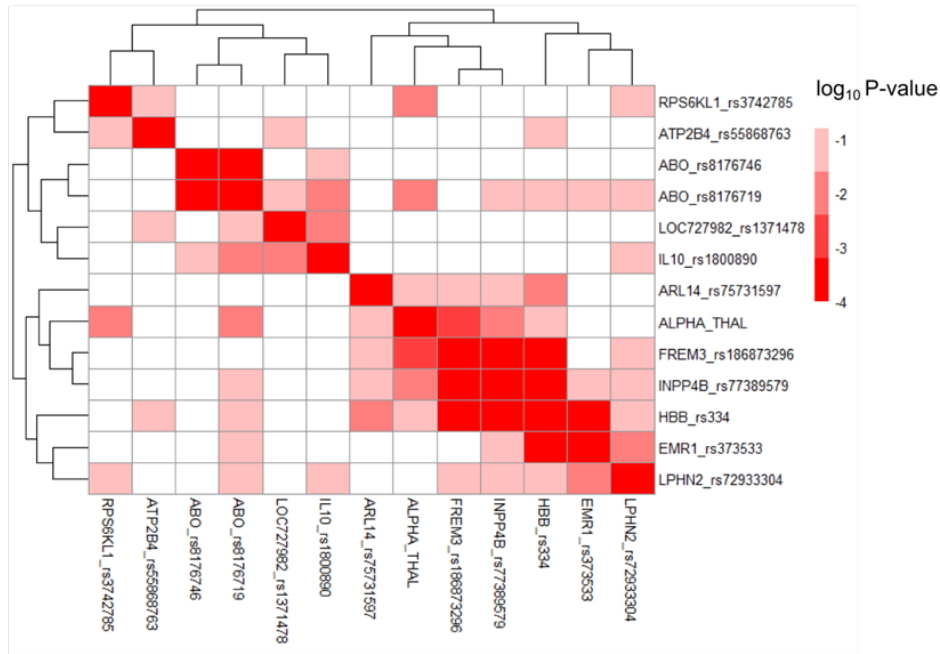

**B**

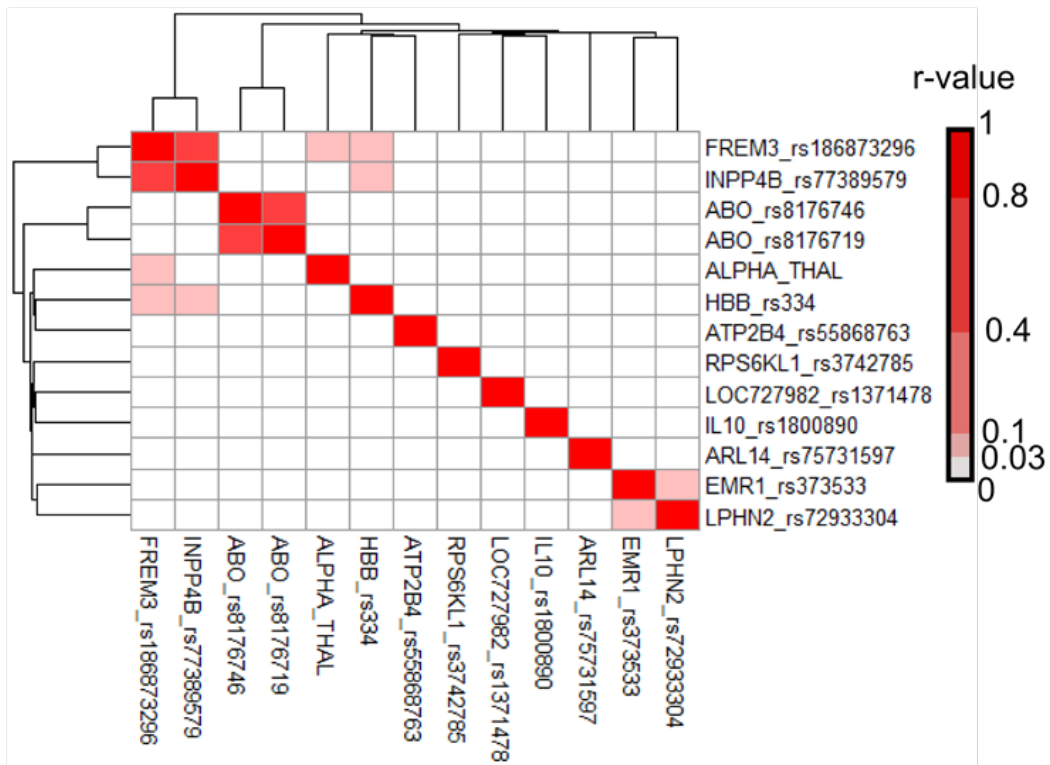

Panels A and B show the p-value and r-value for each pairing of the 13 polymorphisms (Figure 3 and Supplementary Table 14) explaining the variability in severe malaria among individuals in the general population (one SNP per gene except for ABO where both rs8176719 and 8176746 independently explained significant amounts of variance).

A: p-value: Colour indicates significance of linkage disequilibria by  $\chi^2$  test. polymorphism pairs are clustered and ordered according to closeness of p-values.

B: r-value: Colour indicates the strength of the correlation between genotypes (r-value). Values of  $r > 0.03$  are highly significant by  $\chi^2$  test ( $P < 0.001$ ). polymorphism pairs are clustered and ordered according to relatedness of r-values.

**Figure S5. Linkage disequilibria among the 13 polymorphisms explaining most of the variance in the population.**

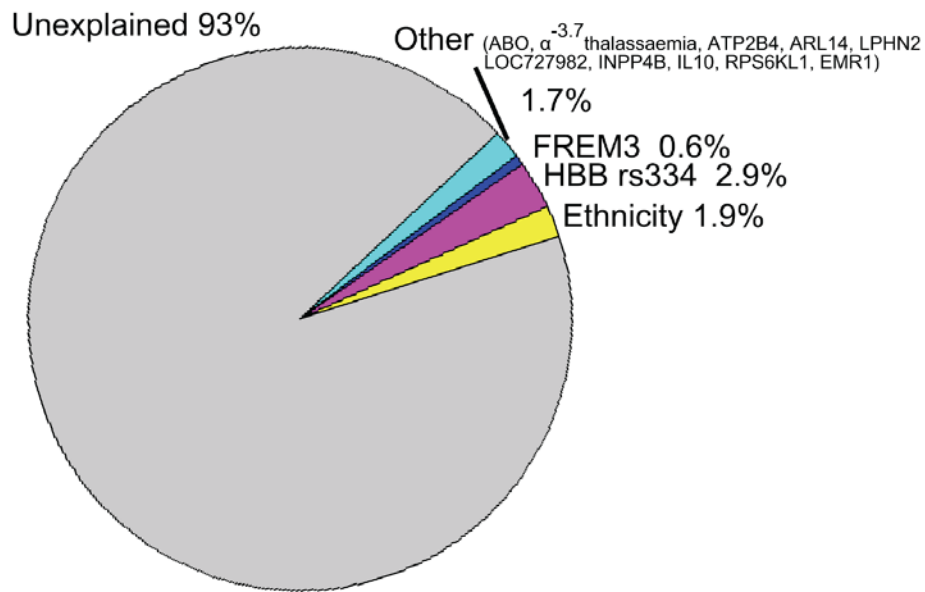

**Figure S6. Proportion of variance in the risk of severe malaria among children that is explained by genetic polymorphisms and other factors.** Values pertain to the general population and were obtained by analysing on the observed (0-1) scale and then transforming to the underlying liability scale (see Supplementary Table 12).

## **MalariaGEN Consortium members**

This list can also be viewed at;

<https://www.malariagen.net/projects/consortial-project-1/malariagen-consortium-members>

## **MalariaGEN Resource Centre**

**Wellcome Centre for Human Genetics, University of Oxford, Oxford, UK;  
The Big Data Institute, University of Oxford, Oxford, UK and The Wellcome  
Sanger Institute, Hinxton, Cambridgeshire, UK**

Aaron Vanderwal, Abier Elzein, Aceme Nyika, Alieu Mendy, Alistair Miles, Andrea Diss, Angeliki Kerasidou, Angie Green, Anna E. Jeffreys, Bronwyn MacInnis, Catherine Hughes, Catherine Moyes, Chris C.A. Spencer, Christina Hubbard, Cinzia Malangone, Claire Potter, Daniel Mead, David Barnwell, Dominic P. Kwiatkowski, Dushyanth Jyothi, Eleanor Drury, Elilan Somaskantharajah, Eliza Hilton, Ellen Leffler, Gareth Maslen, Gavin Band, George Busby, Geraldine M. Clarke, Ioannis Ragoussis, Jacob Almagro Garcia, Jane Rogers, Jantina deVries, Jennifer Shelton, Jiannis Ragoussis, Jim Stalker, Joanne Rodford, John O'Brien, Julie Evans, Kate Rowlands, Katharine Cook, Kathryn Fitzpatrick, Katja Kivinen, Kerrin Small, Kimberly J. Johnson, Kirk A. Rockett, Lee Hart, Magnus Manske, Marilyn McCreight, Marryat Stevens, Matti Pirinen, Meike Hennsman, Michael Parker, Miguel SanJoaquin, Nuno Sepúlveda, Olivia Cook, Olivo Miotto, Panos Deloukas, Rachel Craik, Rebecca Wrigley, Renee Watson, Richard Pearson, Robert Hutton, Samuel Oyola, Sarah Auburn, Shivang Shah, Si Quang Le, Sile Molloy, Susan Bull, Susana Campino, Taane G. Clark, Valentín Ruano-Rubio, Victoria Cornelius, Yik Ying Teo.

## **National Institute for Biological Standards, South Mimms, Hertfordshire, UK**

Patrick Corran, Nilupa Silva, Paul Risley.

## **The Wellcome Trust, London, UK**

Alan Doyle.

## **Bernhard-Nocht-Institut für Tropenmedizin, Hamburg, Germany**

Jennifer Evans, Rolf Horstmann.

**Howard Hughes Medical Institute, University of Maryland, Baltimore, Maryland, USA**

Chris Plowe.

**National Institute of Allergy and Infectious Diseases, Bethesda, Maryland, USA**

Patrick Duffy.

**Foundation for the National Institutes of Health, Bethesda, Maryland, USA**

Dan Carucci, Michael Gottlieb.

**The Institut Pasteur de Dakar, Dakar, Senegal and The Institut Pasteur de Dakar, Paris, France**

Adama Tall, Alioune Badara Ly, Amagana Dolo, Anavaj Sakuntabhai, Odile Puijalon.

**Medical Research Council Laboratories, Banjul Gambia**

Abdou Bah, Abdoulie Camara, Abubacar Sadiq, Aja Abie Khan, Amie Jobarteh, Anthony Mendy, Augustine Ebonyi, Bakary Danso, Bintou Taal, Climent Casals-Pascual, David J. Conway, Emmanuel Onykwelu, Fatoumatta Sisay-Joof, Giorgio Sirugo, Haddy Kanyi, Haddy Njie, Herbert Obu, Horeja Saine, Idrissa Sambou, Ismaela Abubakar, Jalimory Njie, Janet Fullah, Jula Jaiteh, Kalifa A. Bojang, Kebba Jammeh, Kumba Sabally-Ceesay, Lamin Manneh, Landing Camara, Lawrence Yamoah, Madi Njie, Malick Njie, Margaret Pinder, Mariatou Jallow, Mohammed Aiyegbo, Momodou Jasseh, Momodou Lamin Keita, Momodou Saidy-Khan, Muminatou Jallow, Ndey Ceesay, Oba Rasheed, Pa Lamin Ceesay, Pamela Esangbedo, Ramou Cole-Ceesay, Rasaq Olaosebikan, Simon Correa, Sophie Njie, Stanley Usen, Yaya Dibba.

## **University Of Bamako, Bamako Mali**

Abdoulaye Barry, Abdoulaye Djimdé, Abdourahmane H. Sall, Amadou Abathina, Amadou Niangaly, Awa Dembele, Belco Poudiougou, Elizabeth Diarra, Kariatou Bamba, Mahamadou A. Thera, Ogobara Doumbo, Ousmane Toure, Salimata Konate, Sibiry Sissoko, Mahamadou Diakite.

## **Centre National De Recherche Et De Formation Sur Le Paludisme, Ouagadougou Burkina Faso**

Amadou T. Konate, David Modiano, Edith C. Bougouma, Germana Bancone, Issa N. Ouedraogo, Jaques Simpore, Sodiomon B. Sirima, Valentina D. Mangano, Marita Troye-Blomberg.

## **Noguchi Memorial Institute For Medical Research With Navrongo Health Research Centre, Navrongo, Ghana**

Abraham R. Oduro, Abraham V. O. Hodgson, Anita Ghansah, Francis Nkrumah, Frank Atuguba, Kwadwo A. Koram, Lucas N. Amenga-Etego, Michael D. Wilson, Nana Akosua Ansah, Nathan Mensah, Patrick A. Ansah, Thomas Anyorigiya, Victor Asoala, William O. Rogers.

## **Kwame Nkrumah University Of Science And Technology, Kumasi, Ghana**

Alex Osei Akoto, Alex Owusu Ofori, Anthony Enimil, Daniel Ansong, David Sambian, Emmanuel Asafo-Agyei, Justice Sylverken, Sampson Antwi, Tsiri Agbenyega.

## **University Of Ibadan, Ibadan, Nigeria**

Adebola E. Orimadegun, Folakemi Anjol Amodu, Olajumoke Oni, Olayemi O. Omotade, Olukemi Amodu, Subulade Olaniyan.

### **University Of Buea, Buea, Cameroon**

Andre Ndi, Clarisse Yafi, Eric Akum Achidi, Eric Mibunwe, Judith Anchang-Kimbi, Regina Mugri, Richard Besingi, Tobias O. Apinjoh, Vincent Titanji.

### **University Of Khatoum, Khartoum, Sudan**

Ahmed Elhassan, Ayman Hussein, Hiba Mohamed, Ibrahim Elhassan, Muntaser Ibrahim.

### **KEMRI-Wellcome Research Programme, Kilifi, Kenya**

Gilbert Kokwaro, Tom Oluoch, Alexander Macharia, Carolyne M. Ndila, Charles Newton, Daniel H. Opi, Dorcas Kamuya, Evasius Bauni, Kevin Marsh, Norbert Peshu, Sassy Molyneux, Sophie Uyoga, Thomas N. Williams, Vicki Marsh.

### **Joint Malaria Programme, Kilimanjaro Christian Medical Centre And London School Of Hygiene And Tropical Medicine, Moshi, Tanzania**

Alphaxard Manjurano, Behzad Nadjm, Caroline Maxwell, Chris Drakeley, Eleanor Riley, Frank Mtei, George Mtove, Hannah Wangai, Hugh Reyburn, Sarah Joseph.

### **National Institute For Medical Research, Tanga, Tanzania**

Deus Ishengoma, Martha Lemnge, Theonest Mutabingwa.

### **Muhimbili University Of Health And Allied Sciences Of The University Of Dar Es Salaam, Dar Es Salaam, Tanzania**

Julie Makani, Sharon Cox.

**Blantyre Malaria Project With Malawi-Liverpool-Wellcome Programme,  
Blantyre, Malawi**

Ajib Phiri, Annie Munthali, David Kachala, Labes Njiragoma, Malcolm E. Molyneux, Mike Moore, Neema Ntunthama, Paul Pensulo, Terrie Taylor, Vysaul Nyirongo.

**The University of Colombo, Colombo, Sri Lanka**

Richard Carter, Deepika Fernando, Nadira Karunaweera, Rajika Dewasurendra.

**Mahidol University, Bangkok, Thailand**

Prapat Suriyaphol, Pratap Singhasivanon.

**Oxford University Clinical Research Unit, Ho Chi Minh City, Vietnam**

Cameron P. Simmons, Cao Quang Thai, Dinh Xuan Sinh, Jeremy Farrar, Ly Van Chuong, Nguyen Hoan Phu, Nguyen T. Hieu, Nguyen Thi Hoang Mai, Nguyen Thi Ngoc Quyen, Nicholas Day, Sarah J. Dunstan, Sean E. O'Riordan, Tran Thi Hong Chau, Tran Tinh Hien.

**Papua New Guinea Institute For Medical Research, Madang, Papua New  
Guinea**

Angela Allen, Enmoore Lin, Harin Karunajeewa, Ivo Mueller, John Reeder, Laurens Manning, Moses Laman, Pascal Michon, Peter Siba, Stephen Allen, Timothy M. E. Davis.
